# Supplementary material
Source: publisher site journal article supplement (https://www.dovepress.com/article/231796)
Supplement: Supplementary file 1 [file get_supplementary_file.php]

**Supplementary Material**

**Cell culture** **and transient transfection**

Human CC cell lines (HeLa and SiHa), bought fromKeygen Biotech (Nanjing, China), were cultured in DMEM medium (HyClone, Logan, UT, USA) supplemented with 10% fetal bovine serum (FBS, Gibico, Carlsbad, CA, USA) and 1% penicillin-streptomycin solution in a humidified 37℃, 5% CO2 atmosphere. C-33 A (HPV-) cells, bought from GeneChem (Shanghai, China), were cultured in MEM (HyClone, Logan, UT, USA) containing FBS and penicillin-streptomycin solution at the same concentration as indicated above. MIR22HG overexpression plasmid and GV146 empty vector (GeneChem, Shanghai, China) were transiently transfected using Lipofectamine 2000 (Invitrogen, Carlsbad, CA, USA) according to manufacturer’s instructions. Empty or overexpression plasmids after the cells were cultured for 48 hours, the cells were collected and RNA extracted or functionally analyzed. Briefly, 5*105 cells were plated in 6-well plates for 24 hours and subsequently incubated with the transfection mixture for 48 hours before cell collection and RNA extraction or functional analysis.

**RNAs extraction and qRT-PCR**

Total RNA was isolated by TRIzol reagent (Invitrogen) and subsequently reverse transcribed with application of cDNA Reverse Transcription Kit (Toyobo, Osaka, Japan). Real-time PCR was carried out using SYBR® Green PCR kit (Toyobo). The housekeeping gene GAPDH was used as loading controls. Premiers sequences were listed in Table S7.

**CCK-8 assays**

The transfected cells (5 × 103 cells/well) were seeded in 96-well plates and cells of each group were set up in parallel with 6 duplicate holes. At 24, 48, 72 or 96 hours respectively, 10μl CCK-8 reagent (Beyotime, Shanghai, China) was added to each plate for another 2 hours of incubation at 37°C. The absorbance was then tested at a wavelength of 450 nm (OD 450 value).

**Transwell assays**

For invasion assays, after 48 hours of transfection, 4×105 cells were added to the upper compartment of Matrigel-coated (BD, Franklin Lakes, NJ, USA) invasion chambers (8-mm pore size, Corning, New York, USA) and 500 μL of DMEM/MEM supplemented with 10% FBS was added to the lower chamber. After 24 hours, cells at the bottom of the chamber were fixed with 100% methanol and stained with 0.1% crystal violet. Air dried cells counted under a microscope and five randomly fields were counted randomly in each well. Migration was also measured according to the above method without Matrigel.

**
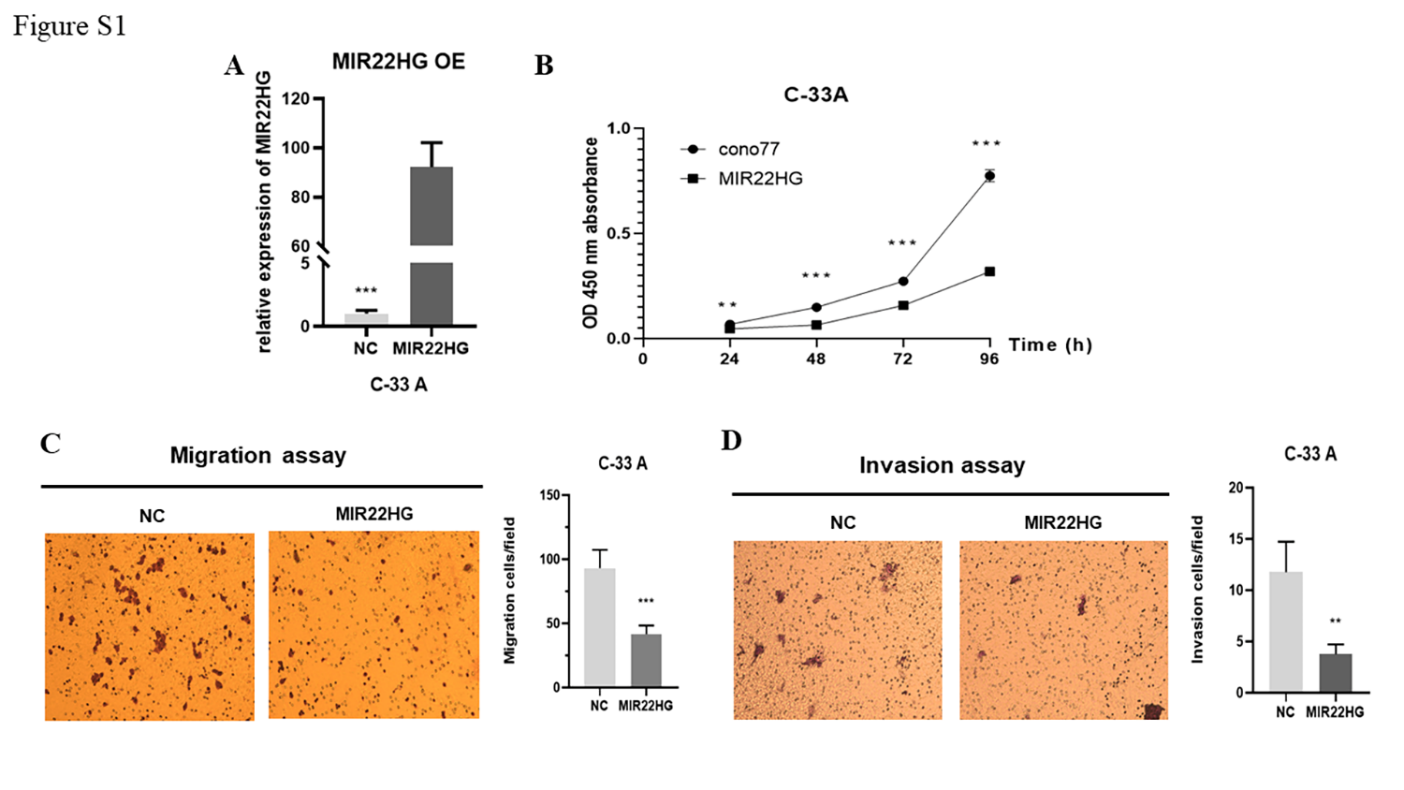
**

**Figure S1 MIR22HG overexpression inhibited C-33 A cells proliferation.**

(A) qRT-PCR determined expression efficiency of transfection with MIR22HG in C-33 A cells. Quantitative normalization of MIR22HG was performed in each sample using GAPDH expression as an internal control. (B) The CCK-8 assay was conducted to measure cell proliferation in C-33 A cells after transfection with MIR22HG. (C and D) Transwell assays were used for testing the migration and invasion ability of C-33 A cells after transfection with MIR22HG (10X). ***P<0.001, **P<0.01, *P<0.05.

**Table S1 The annotated 4072 lncRNAs from the website of HGNC**

| HGNC ID | Chromosomal Symbol | Location | Entrez Gene ID | Ensembl Gene ID |
| --- | --- | --- | --- | --- |
| HGNC:37133 | A1BG-AS1 | 19q13.43 | 503538 | ENSG00000268895 |
| HGNC:27057 | A2M-AS1 | 12p13.31 | 144571 | ENSG00000245105 |
| HGNC:41022 | A2ML1-AS1 | 12p13.31 | 100874108 | ENSG00000256661 |
| HGNC:41523 | A2ML1-AS2 | 12p13.31 | 106478979 | ENSG00000256904 |
| HGNC:50301 | AADACL2-AS1 | 3q25.1 | 101928142 | ENSG00000242908 |
| HGNC:51526 | AATBC | 21q22.3 | 284837 | ENSG00000215458 |
| HGNC:49667 | ABALON | 20q11.21 | 103021294 | ENSG00000281376 |
| HGNC:39983 | ABCA9-AS1 | 17q24.2 | 104355297 | ENSG00000231749 |
| HGNC:40055 | ABCC5-AS1 | 3q27.1 | 100873982 | ENSG00000223882 |
| HGNC:53628 | ABCF1-DT | 6p21.33 | 107986587 |  |
| HGNC:18289 | ABHD11-AS1 | 7q11.23 | 171022 | ENSG00000225969 |
| HGNC:49685 | ABHD15-AS1 | 17q11.2 | 104355133 | ENSG00000264031 |
| HGNC:41426 | ACAP2-IT1 | 3q29 | 100874306 | ENSG00000229325 |
| HGNC:40701 | ACBD3-AS1 | 1q42.12 | 107985353 | ENSG00000234478 |
| HGNC:41112 | ACOXL-AS1 | 2q13 | 400997 | ENSG00000204581 |
| HGNC:45169 | ACTA2-AS1 | 10q23.31 | 100132116 | ENSG00000180139 |
| HGNC:20131 | ACTN1-AS1 | 14q24.1 | 161159 | ENSG00000259062 |
| HGNC:53965 | ACTR3-AS1 | 2q14.1 | 101060091 |  |
| HGNC:44161 | ACVR2B-AS1 | 3p22.2 | 100128640 | ENSG00000229589 |
| HGNC:40625 | ADAMTS9-AS1 | 3p14.1 | 101929335 | ENSG00000241158 |
| HGNC:42435 | ADAMTS9-AS2 | 3p14.1 | 100507098 | ENSG00000241684 |
| HGNC:40797 | ADAMTS19-AS1 | 5q23.3 | 103689846 | ENSG00000249421 |
| HGNC:32041 | ADAMTSL4-AS1 | 1q21.2 | 574406 | ENSG00000203804 |
| HGNC:23299 | ADARB2-AS1 | 10p15.3 | 642394 | ENSG00000205696 |
| HGNC:48682 | ADD3-AS1 | 10q25.1 | 100505933 | ENSG00000203876 |
| HGNC:49543 | ADGRA1-AS1 | 10q26.3 | 100128127 | ENSG00000256925 |
| HGNC:53314 | ADGRD1-AS1 | 12q24.33 | 105755954 | ENSG00000256151 |
| HGNC:50604 | ADGRL3-AS1 | 4q13.1 | 101927186 | ENSG00000248692 |
| HGNC:40648 | ADIPOQ-AS1 | 3q27.3 | 100874095 | ENSG00000226482 |
| HGNC:45127 | ADIRF-AS1 | 10q23.2 | 100133190 | ENSG00000272734 |
| HGNC:51227 | ADNP-AS1 | 20q13.13 | 101927631 | ENSG00000259456 |
| HGNC:37122 | ADORA2A-AS1 | 22q11.23 | 646023 | ENSG00000178803 |
| HGNC:44144 | ADPGK-AS1 | 15q24.1 | 100287559 | ENSG00000260898 |
| HGNC:28141 | AFAP1-AS1 | 4p16.1 | 84740 | ENSG00000272620 |
| HGNC:21236 | AFDN-DT | 6q27 | 653483 | ENSG00000198221 |
| HGNC:53447 | AFF1-AS1 | 4q21.3 | 100506746 |  |
| HGNC:41334 | AFF2-IT1 | Xq28 | 100874269 | ENSG00000223516 |
| HGNC:41427 | AGAP1-IT1 | 2q37.2 | 100506749 | ENSG00000235529 |
| HGNC:48633 | AGAP2-AS1 | 12q14.1 | 100130776 | ENSG00000255737 |
| HGNC:48617 | AGBL1-AS1 | 15q25.3 | 727915 | ENSG00000260125 |
| HGNC:41482 | AGBL4-IT1 | 1p33 | 100874313 | ENSG00000225623 |
| HGNC:41133 | AGBL5-AS1 | 2p23.3 | 100874031 | ENSG00000231636 |
| HGNC:41484 | AGBL5-IT1 | 2p23.3 | 106481744 | ENSG00000229122 |
| HGNC:20988 | AGPAT4-IT1 | 6q26 | 79992 | ENSG00000279355 |
| HGNC:34515 | AIRN | 6q25.3 | 100271873 | ENSG00000268257 |
| HGNC:41304 | AKT3-IT1 | 1q44 | 100874263 | ENSG00000228939 |
| HGNC:40244 | ALDH1L1-AS1 | 3q21.3 | 100874204 | ENSG00000250218 |
| HGNC:42446 | ALDH1L1-AS2 | 3q21.3 | 100862662 | ENSG00000246022 |
| HGNC:41409 | ALG9-IT1 | 11q23.1 | 100874303 | ENSG00000254450 |
| HGNC:41277 | ALG13-AS1 | Xq23 | 106478971 | ENSG00000229487 |
| HGNC:48670 | ALKBH3-AS1 | 11p11.2 | 100507300 | ENSG00000244926 |
| HGNC:41305 | ALMS1-IT1 | 2p13.1 | 100874291 | ENSG00000230002 |
| HGNC:51342 | ALOX12-AS1 | 17p13.1 | 100506713 | ENSG00000215067 |
| HGNC:41306 | AMMECR1-IT1 | Xq23 | 100874352 | ENSG00000224142 |
| HGNC:54102 | ANK3-DT | 10q21.2 | 105378320 | ENSG00000254271 |
| HGNC:39891 | ANKRD10-IT1 | 13q34 | 100505494 | ENSG00000229152 |
| HGNC:41298 | ANKRD33B-AS1 | 5p15.2 | 100874247 | ENSG00000250106 |
| HGNC:48618 | ANKRD34C-AS1 | 15q25.1 | 729911 | ENSG00000259234 |
| HGNC:41477 | ANKRD44-IT1 | 2q33.1 | 101927547 | ENSG00000236977 |
| HGNC:40016 | ANO1-AS1 | 11q13.3 | 100873981 | ENSG00000254902 |
| HGNC:25672 | ANP32A-IT1 | 15q23 | 80035 |  |
| HGNC:41307 | AOAH-IT1 | 7p14.2 | 100874264 | ENSG00000230539 |
| HGNC:44114 | AP4B1-AS1 | 1p13.2 | 100287722 | ENSG00000226167 |
| HGNC:27152 | APCDD1L-DT | 20q13.32 | 149773 | ENSG00000231290 |
| HGNC:40079 | APOA1-AS | 11q23.3 | 104326055 | ENSG00000235910 |
| HGNC:43836 | APOBEC3B-AS1 | 22q13.1 | 100874530 | ENSG00000249310 |
| HGNC:44173 | APTR | 7q11.23 | 100505854 | ENSG00000214293 |
| HGNC:26399 | AQP4-AS1 | 18q11.2 | 147429 | ENSG00000260372 |
| HGNC:39993 | ARAP1-AS1 | 11q13.4 | 100874075 | ENSG00000256007 |
| HGNC:39994 | ARAP1-AS2 | 11q13.4 | 100506020 | ENSG00000245148 |
| HGNC:51593 | ARF4-AS1 | 3p14.3 | 106144532 | ENSG00000272146 |
| HGNC:20279 | ARHGAP5-AS1 | 14q12 | 84837 | ENSG00000258655 |
| HGNC:42944 | ARHGAP22-IT1 | 10q11.22 | 100689073 | ENSG00000248682 |
| HGNC:40792 | ARHGAP26-AS1 | 5q31.3 | 100874239 | ENSG00000226272 |
| HGNC:41429 | ARHGAP26-IT1 | 5q31.3 | 100874372 | ENSG00000230789 |
| HGNC:41235 | ARHGAP31-AS1 | 3q13.33 | 100874246 | ENSG00000241155 |
| HGNC:40083 | ARHGEF3-AS1 | 3p14.3 | 100874200 | ENSG00000240198 |
| HGNC:39816 | ARHGEF7-AS1 | 13q34 | 100874226 | ENSG00000227352 |
| HGNC:40717 | ARHGEF7-AS2 | 13q34 | 100874238 | ENSG00000235875 |
| HGNC:41408 | ARHGEF7-IT1 | 13q34 | 100874371 | ENSG00000233644 |
| HGNC:41401 | ARHGEF9-IT1 | Xq11.1 | 100874355 | ENSG00000231729 |
| HGNC:39996 | ARHGEF19-AS1 | 1p36.13 | 100874233 | ENSG00000234166 |
| HGNC:41048 | ARHGEF26-AS1 | 3q25.2 | 100507524 | ENSG00000243069 |
| HGNC:41483 | ARHGEF38-IT1 | 4q24 | 100874374 | ENSG00000249885 |
| HGNC:53032 | ARLNC1 | 16q23.2 | 100996425 | ENSG00000260896 |
| HGNC:41008 | ARMC2-AS1 | 6q21 | 101929716 | ENSG00000230290 |
| HGNC:41038 | ARMCX3-AS1 | Xq22.1 | 100128574 | ENSG00000228275 |
| HGNC:49892 | ARNTL2-AS1 | 12p11.23 | 101928646 | ENSG00000245311 |
| HGNC:40785 | ARPP21-AS1 | 3p22.3 | 100874098 | ENSG00000230830 |
| HGNC:23395 | ARRDC1-AS1 | 9q34.3 | 85026 | ENSG00000203993 |
| HGNC:44145 | ARRDC3-AS1 | 5q14.3 | 100129716 | ENSG00000281357 |
| HGNC:40085 | ARSD-AS1 | Xp22.33 | 100506356 | ENSG00000229851 |
| HGNC:24998 | ASAP1-IT1 | 8q24.21 | 29065 |  |
| HGNC:48917 | ASAP1-IT2 | 8q24.21 | 100507117 | ENSG00000280543 |
| HGNC:25442 | ASB16-AS1 | 17q21.31 | 339201 | ENSG00000267080 |
| HGNC:44146 | ASH1L-AS1 | 1q22 | 645676 | ENSG00000235919 |
| HGNC:41449 | ASH1L-IT1 | 1q22 | 106478976 | ENSG00000227773 |
| HGNC:25811 | ASMTL-AS1 | Xp22.33 and Yp11.32 | 80161 | ENSG00000236017 |
| HGNC:51175 | ASTN2-AS1 | 9q33.1 | 100128505 | ENSG00000229105 |
| HGNC:49496 | ATE1-AS1 | 10q26.13 | 100130887 | ENSG00000226864 |
| HGNC:40914 | ATG10-AS1 | 5q14.1 | 100874022 | ENSG00000248192 |
| HGNC:41455 | ATG10-IT1 | 5q14.1 | 100874311 | ENSG00000236447 |
| HGNC:28262 | ATP1A1-AS1 | 1p13.1 | 84852 | ENSG00000203865 |
| HGNC:40088 | ATP1B3-AS1 | 3q23 | 100874077 | ENSG00000244124 |
| HGNC:51370 | ATP2A1-AS1 | 16p11.2 | 100289092 | ENSG00000260442 |
| HGNC:27883 | ATP2B1-AS1 | 12q21.33 | 338758 | ENSG00000271614 |
| HGNC:41309 | ATP2B2-IT1 | 3p25.3 | 100874324 | ENSG00000236999 |
| HGNC:41310 | ATP2B2-IT2 | 3p25.3 | 100874325 | ENSG00000224771 |
| HGNC:53167 | ATP2C2-AS1 | 16q24.1 | 105371374 | ENSG00000261286 |
| HGNC:51118 | ATP6V1B1-AS1 | 2p13.3 | 101927750 | ENSG00000239322 |
| HGNC:44180 | ATP6V0E2-AS1 | 7q36.1 | 401431 | ENSG00000204934 |
| HGNC:40645 | ATP11A-AS1 | 13q34 | 100874205 | ENSG00000232684 |
| HGNC:41095 | ATP13A4-AS1 | 3q29 | 101929198 | ENSG00000225473 |
| HGNC:41281 | ATP13A5-AS1 | 3q29 | 100874218 | ENSG00000236508 |
| HGNC:51838 | ATXN2-AS | 12q24.12 | 102723619 | ENSG00000258099 |
| HGNC:10561 | ATXN8OS | 13q21.33 | 6315 | ENSG00000230223 |
| HGNC:51558 | AZIN1-AS1 | 8q22.3 | 100506753 | ENSG00000253320 |
| HGNC:16424 | B3GALT5-AS1 | 21q22.2 | 114041 | ENSG00000184809 |
| HGNC:49910 | B4GALT1-AS1 | 9p21.1 | 101929639 | ENSG00000233554 |
| HGNC:40090 | B4GALT4-AS1 | 3q13.32 | 100874201 | ENSG00000240254 |
| HGNC:50461 | BAALC-AS1 | 8q22.3 | 100499183 | ENSG00000247081 |
| HGNC:28595 | BAALC-AS2 | 8q22.3 | 157556 | ENSG00000236939 |
| HGNC:44171 | BABAM2-AS1 | 2p23.2 | 100302650 |  |
| HGNC:37125 | BACE1-AS | 11q23.3 | 100379571 | ENSG00000278768 |
| HGNC:16024 | BACE2-IT1 | 21q22.2 | 282569 | ENSG00000224388 |
| HGNC:40008 | BACH1-AS1 | 21q21.3 | 106478962 | ENSG00000232118 |
| HGNC:40006 | BACH1-IT1 | 21q21.3 |  | ENSG00000248476 |
| HGNC:40007 | BACH1-IT2 | 21q21.3 | 100874322 | ENSG00000228817 |
| HGNC:16455 | BACH1-IT3 | 21q21.3 | 54147 | ENSG00000234293 |
| HGNC:44342 | BAIAP2-DT | 17q25.3 | 440465 | ENSG00000226137 |
| HGNC:43877 | BANCR | 9q21.11-q21.12 | 100885775 | ENSG00000278910 |
| HGNC:50673 | BARX1-DT | 9q22.32 | 101928040 | ENSG00000235601 |
| HGNC:26609 | BASP1-AS1 | 5p15.1 | 285696 | ENSG00000215196 |
| HGNC:50700 | BBOX1-AS1 | 11p14.2-p14.1 | 103695435 | ENSG00000254560 |
| HGNC:22170 | BCAR4 | 16p13.13 | 400500 | ENSG00000262117 |
| HGNC:44113 | BCDIN3D-AS1 | 12q13.12 | 100286844 | ENSG00000258057 |
| HGNC:1022 | BCYRN1 | 2p21 | 618 | ENSG00000236824 |
| HGNC:20608 | BDNF-AS | 11p14.1 | 497258 | ENSG00000245573 |
| HGNC:51114 | BEAN1-AS1 | 16q21 | 101927726 | ENSG00000261656 |
| HGNC:28425 | BFSP2-AS1 | 3q22.1 | 85003 | ENSG00000249993 |
| HGNC:49033 | BGLT3 | 11p15.4 | 103344929 | ENSG00000260629 |
| HGNC:44471 | BHLHE40-AS1 | 3p26.1 | 100507582 | ENSG00000235831 |
| HGNC:51588 | BICRA-AS1 | 19q13.33 | 106144534 | ENSG00000269806 |
| HGNC:25868 | BIN3-IT1 | 8p21.3 | 80094 |  |
| HGNC:40641 | BIRC6-AS1 | 2p22.3 | 100874009 | ENSG00000230046 |
| HGNC:50490 | BIRC6-AS2 | 2p22.3 | 103752586 | ENSG00000279897 |
| HGNC:51290 | BISPR | 19p13.11 | 105221694 | ENSG00000282851 |
| HGNC:48597 | BLACAT1 | 1q32.1 | 101669762 | ENSG00000281406 |
| HGNC:20484 | BLACE | 7q36.3 | 338436 | ENSG00000204960 |
| HGNC:53612 | BMF-AS1 | 15q15.1 | 110806288 | ENSG00000259409 |
| HGNC:40096 | BMP7-AS1 | 20q13.31 | 102723590 | ENSG00000235032 |
| HGNC:50864 | BMPR1B-DT | 4q22.3 | 100507012 | ENSG00000249599 |
| HGNC:53727 | BNC2-AS1 | 9p22.2 | 111216284 | ENSG00000234779 |
| HGNC:35125 | BOK-AS1 | 2q37.3 | 100379249 | ENSG00000234235 |
| HGNC:42922 | BOLA3-AS1 | 2p13.1 | 100507171 | ENSG00000225439 |
| HGNC:13228 | BPESC1 | 3q23 | 60467 | ENSG00000232416 |
| HGNC:40614 | BRWD1-AS1 | 21q22.2 | 100874093 | ENSG00000238141 |
| HGNC:16423 | BRWD1-AS2 | 21q22.2 | 103091865 | ENSG00000255568 |
| HGNC:41920 | BRWD1-IT1 | 21q22.2 | 106480743 | ENSG00000237373 |
| HGNC:40102 | BSN-AS1 | 3p21.31 | 106478963 | ENSG00000235120 |
| HGNC:42445 | BSN-DT | 3p21.31 | 100132677 | ENSG00000226913 |
| HGNC:40959 | BTBD9-AS1 | 6p21.2 | 101929425 | ENSG00000226533 |
| HGNC:53145 | BTG3-AS1 | 21q21.1 | 110806272 | ENSG00000280594 |
| HGNC:21223 | BVES-AS1 | 6q21 | 154442 | ENSG00000203808 |
| HGNC:44351 | C1QTNF1-AS1 | 17q25.3 | 100507410 | ENSG00000265096 |
| HGNC:39906 | C1QTNF9-AS1 | 13q12.12 | 100874232 | ENSG00000240868 |
| HGNC:27461 | C1RL-AS1 | 12p13.31 | 283314 | ENSG00000205885 |
| HGNC:49464 | C2-AS1 | 6p21.33 | 102060414 | ENSG00000281756 |
| HGNC:54045 | C2CD4D-AS1 | 1q21.3 | 100132111 | ENSG00000234614 |
| HGNC:41063 | C3orf67-AS1 | 3p14.2 | 101929238 | ENSG00000242428 |
| HGNC:39753 | C4A-AS1 | 6p21.33 | 106478955 | ENSG00000233627 |
| HGNC:39752 | C4B-AS1 | 6p21.33 | 106480730 | ENSG00000229776 |
| HGNC:53618 | C5-OT1 | 9q33.2 | 110599590 |  |
| HGNC:52969 | C5orf64-AS1 | 5q12.1 | 100506526 | ENSG00000251575 |
| HGNC:49679 | C5orf66-AS1 | 5q31.1 | 101927953 | ENSG00000249082 |
| HGNC:27964 | C5orf66-AS2 | 5q31.1 | 340073 | ENSG00000249647 |
| HGNC:39767 | C6orf47-AS1 | 6p21.33 | 106480731 | ENSG00000227198 |
| HGNC:27840 | C8orf34-AS1 | 8q13.2 | 286189 | ENSG00000248801 |
| HGNC:50444 | C8orf37-AS1 | 8q22.1 | 100616530 | ENSG00000253773 |
| HGNC:48713 | C9orf135-DT | 9q21.12 | 494558 | ENSG00000225626 |
| HGNC:45007 | C10orf71-AS1 | 10q11.23 | 100506769 | ENSG00000236208 |
| HGNC:1290 | C21orf62-AS1 | 21q22.11 | 54067 | ENSG00000205930 |
| HGNC:16729 | C21orf91-OT1 | 21q21.1 | 246312 | ENSG00000240770 |
| HGNC:51657 | CA3-AS1 | 8q21.2 | 100996348 | ENSG00000253549 |
| HGNC:40119 | CACNA1C-AS1 | 12p13.33 | 100652846 | ENSG00000246627 |
| HGNC:40118 | CACNA1C-AS2 | 12p13.33 | 100874235 | ENSG00000256271 |
| HGNC:40117 | CACNA1C-AS3 | 12p13.33 | 106478964 | ENSG00000256769 |
| HGNC:40116 | CACNA1C-AS4 | 12p13.33 | 100874234 | ENSG00000256025 |
| HGNC:41312 | CACNA1C-IT1 | 12p13.33 | 107984540 | ENSG00000256837 |
| HGNC:41313 | CACNA1C-IT2 | 12p13.33 | 100874369 | ENSG00000256257 |
| HGNC:41314 | CACNA1C-IT3 | 12p13.33 | 100874370 | ENSG00000256721 |
| HGNC:27377 | CACNA1G-AS1 | 17q21.33 | 253962 | ENSG00000250107 |
| HGNC:40702 | CACNA2D3-AS1 | 3p14.3 | 100874237 | ENSG00000243715 |
| HGNC:31391 | CACTIN-AS1 | 19p13.3 | 404665 | ENSG00000226800 |
| HGNC:41248 | CADM2-AS1 | 3p12.1 | 100874038 | ENSG00000239519 |
| HGNC:41247 | CADM2-AS2 | 3p12.1 | 100874037 | ENSG00000241648 |
| HGNC:40812 | CADM3-AS1 | 1q23.2 | 100131825 | ENSG00000225670 |
| HGNC:42860 | CAHM | 6q26 | 100526820 | ENSG00000270419 |
| HGNC:44682 | CALML3-AS1 | 10p15.1 | 100132159 | ENSG00000205488 |
| HGNC:53020 | CAMTA1-DT | 1p36.31 | 110841581 | ENSG00000237436 |
| HGNC:41446 | CAMTA1-IT1 | 1p36.23 | 100874340 | ENSG00000237402 |
| HGNC:48839 | CAPN10-DT | 2q37.3 | 101752400 | ENSG00000260942 |
| HGNC:51408 | CARD8-AS1 | 19q13.33 | 100505812 | ENSG00000268001 |
| HGNC:42872 | CARMN | 5q32 | 728264 | ENSG00000249669 |
| HGNC:51188 | CARNMT1-AS1 | 9q21.13 | 101927380 | ENSG00000203321 |
| HGNC:40125 | CARS-AS1 | 11p15.4 | 100852407 | ENSG00000247473 |
| HGNC:22933 | CASC2 | 10q26.11 | 255082 | ENSG00000177640 |
| HGNC:49076 | CASC6 | 6q15 | 101929083 | ENSG00000224944 |
| HGNC:45129 | CASC8 | 8q24.21 | 727677 | ENSG00000246228 |
| HGNC:48906 | CASC9 | 8q21.13 | 101805492 | ENSG00000249395 |
| HGNC:48939 | CASC11 | 8q24.21 | 100270680 | ENSG00000249375 |
| HGNC:28245 | CASC15 | 6p22.3 | 401237 | ENSG00000272168 |
| HGNC:48608 | CASC16 | 16q12.1-q12.2 | 643714 | ENSG00000249231 |
| HGNC:43911 | CASC17 | 17q24.3 | 101928165 | ENSG00000260785 |
| HGNC:49463 | CASC18 | 12q23.3 | 101929110 | ENSG00000257859 |
| HGNC:49476 | CASC19 | 8q24.21 | 103021165 | ENSG00000254166 |
| HGNC:49477 | CASC20 | 20p12.3 | 101929244 | ENSG00000229876 |
| HGNC:49836 | CASC21 | 8q24.21 | 103021164 | ENSG00000253929 |
| HGNC:50627 | CASC22 | 16q12.1 | 283854 | ENSG00000260887 |
| HGNC:50865 | CASC23 | 11p15.4 | 103581031 | ENSG00000255420 |
| HGNC:40126 | CASK-AS1 | Xp11.4 | 100873928 | ENSG00000233033 |
| HGNC:41080 | CATIP-AS1 | 2q35 | 101928513 | ENSG00000225062 |
| HGNC:41079 | CATIP-AS2 | 2q35 | 103689911 | ENSG00000237281 |
| HGNC:43664 | CBR3-AS1 | 21q22.12 | 100506428 | ENSG00000236830 |
| HGNC:45128 | CCAT1 | 8q24.21 | 100507056 | ENSG00000247844 |
| HGNC:47044 | CCAT2 | 8q24.21 | 101805488 | ENSG00000280997 |
| HGNC:41142 | CCDC13-AS1 | 3p22.1 | 100874114 | ENSG00000173811 |
| HGNC:52262 | CCDC18-AS1 | 1p22.1 | 100131564 | ENSG00000223745 |
| HGNC:28416 | CCDC26 | 8q24.21 | 137196 | ENSG00000229140 |
| HGNC:49641 | CCDC37-DT | 3q21.3 | 100506907 | ENSG00000249833 |
| HGNC:41089 | CCDC39-AS1 | 3q26.33 | 100874112 | ENSG00000243187 |
| HGNC:51340 | CCDC144NL-AS1 | 17p11.2 | 440416 | ENSG00000233098 |
| HGNC:44134 | CCDC148-AS1 | 2q24.1 | 554201 | ENSG00000227480 |
| HGNC:44105 | CCDC183-AS1 | 9q34.3 | 100131193 | ENSG00000228544 |
| HGNC:51693 | CCEPR | 10q21.1 | 105682749 |  |
| HGNC:49398 | CCND2-AS1 | 12p13.32 | 103752584 | ENSG00000255920 |
| HGNC:40130 | CCNT2-AS1 | 2q21.3 | 100129961 | ENSG00000224043 |
| HGNC:43896 | CD27-AS1 | 12p13.31 | 678655 | ENSG00000215039 |
| HGNC:40133 | CD44-AS1 | 11p13 | 109729172 | ENSG00000255443 |
| HGNC:49384 | CD81-AS1 | 11p15.5 | 101927682 | ENSG00000238184 |
| HGNC:54071 | CD200R1L-AS1 | 3q13.2 | 100129297 | ENSG00000242770 |
| HGNC:49735 | CDC37L1-DT | 9p24.1 | 101929351 | ENSG00000273061 |
| HGNC:41317 | CDC42-IT1 | 1p36.12 | 100874292 | ENSG00000230068 |
| HGNC:53088 | CDH18-AS1 | 5p14.3 | 102725105 | ENSG00000249854 |
| HGNC:31433 | CDH23-AS1 | 10q22.1 | 102723377 | ENSG00000223817 |
| HGNC:42399 | CDKN1A-AS1 | 6p21.1 | 100861512 |  |
| HGNC:23831 | CDKN2A-DT | 9p21.3 | 51198 | ENSG00000224854 |
| HGNC:34341 | CDKN2B-AS1 | 9p21.3 | 100048912 | ENSG00000240498 |
| HGNC:48926 | CDR1-AS | Xq27.1 | 103611090 |  |
| HGNC:14386 | CDRT7 | 17p12 | 94150 | ENSG00000259944 |
| HGNC:14387 | CDRT8 | 17p12 | 94151 | ENSG00000265163 |
| HGNC:25710 | CEBPA-DT | 19q13.11 | 80054 | ENSG00000267296 |
| HGNC:51226 | CEBPB-AS1 | 20q13.13 | 101927559 | ENSG00000277449 |
| HGNC:1841 | CECR3 | 22q11.1 | 27442 | ENSG00000241832 |
| HGNC:1845 | CECR7 | 22q11.1 | 100130418 | ENSG00000237438 |
| HGNC:1847 | CECR9 | 22q11.2 | 30847 | ENSG00000231004 |
| HGNC:23515 | CELF2-AS1 | 10p14 | 414196 | ENSG00000181800 |
| HGNC:44703 | CELF2-AS2 | 10p14 | 439950 | ENSG00000237986 |
| HGNC:54157 | CELF2-DT | 10p14 | 101928322 | ENSG00000270111 |
| HGNC:27055 | CEP83-DT | 12q22 | 144486 | ENSG00000278916 |
| HGNC:52664 | CERNA1 | 15q21.2 | 100129973 | ENSG00000259577 |
| HGNC:51354 | CERNA2 | 10q23.1 | 642934 | ENSG00000285972 |
| HGNC:53469 | CERNA3 | 8q12.1 | 105375847 | ENSG00000253603 |
| HGNC:51431 | CERS3-AS1 | 15q26.3 | 102723320 | ENSG00000259430 |
| HGNC:44485 | CERS6-AS1 | 2q24.3 | 100861402 | ENSG00000227617 |
| HGNC:41113 | CFAP44-AS1 | 3q13.2 | 100874029 | ENSG00000243849 |
| HGNC:45243 | CFAP58-DT | 10q25.1 | 100505869 | ENSG00000231233 |
| HGNC:14437 | CFLAR-AS1 | 2q33.1 | 65072 | ENSG00000226312 |
| HGNC:40144 | CFTR-AS1 | 7q31.2 | 111082987 | ENSG00000232661 |
| HGNC:53620 | CHAER1 | 4q12 | 105377667 |  |
| HGNC:40146 | CHKB-DT | 22q13.33 | 100144603 | ENSG00000205559 |
| HGNC:40148 | CHL1-AS1 | 3p26.3 | 101927193 | ENSG00000234661 |
| HGNC:40147 | CHL1-AS2 | 3p26.3 | 101927174 | ENSG00000224318 |
| HGNC:52778 | CHMP1B-AS1 | 18p11.21 | 109729129 | ENSG00000267165 |
| HGNC:1279 | CHODL-AS1 | 21q21.1 | 54075 | ENSG00000231755 |
| HGNC:40150 | CHRM3-AS1 | 1q43 | 100873984 | ENSG00000234601 |
| HGNC:43725 | CHRM3-AS2 | 1q43 | 100506915 | ENSG00000233355 |
| HGNC:28588 | CIRBP-AS1 | 19p13.3 | 148046 | ENSG00000267493 |
| HGNC:49426 | CISTR | 12q13.13 | 102216268 | ENSG00000260492 |
| HGNC:48997 | CKMT2-AS1 | 5q14.1 | 100131067 | ENSG00000247572 |
| HGNC:54055 | CLCA4-AS1 | 1p22.3 | 105378828 | ENSG00000236915 |
| HGNC:39907 | CLDN10-AS1 | 13q32.1 | 100874194 | ENSG00000223392 |
| HGNC:53407 | CLEC12A-AS1 | 12p13.31 | 400002 | ENSG00000231560 |
| HGNC:48586 | CLIP1-AS1 | 12q24.31 | 100507066 | ENSG00000257097 |
| HGNC:52287 | CLMAT3 | 5q33.1 | 101927096 | ENSG00000249035 |
| HGNC:30895 | CLRN1-AS1 | 3q25.1 | 116933 | ENSG00000239265 |
| HGNC:49095 | CLSTN2-AS1 | 3q23 | 101927808 | ENSG00000250433 |
| HGNC:39893 | CLYBL-AS1 | 13q32.3 | 101927465 | ENSG00000234303 |
| HGNC:39894 | CLYBL-AS2 | 13q32.3 | 100874063 | ENSG00000227659 |
| HGNC:53592 | CNNM3-DT | 2q11.2 | 100506036 | ENSG00000273265 |
| HGNC:41031 | CNOT10-AS1 | 3p22.3 | 100874109 | ENSG00000251224 |
| HGNC:48712 | CNTFR-AS1 | 9p13.3 | 415056 | ENSG00000237159 |
| HGNC:39985 | CNTN4-AS1 | 3p26.2 | 100873975 | ENSG00000237990 |
| HGNC:39986 | CNTN4-AS2 | 3p26.3 | 100873976 | ENSG00000227588 |
| HGNC:40825 | COA6-AS1 | 1q42.2 | 101927765 | ENSG00000231663 |
| HGNC:53133 | COL1A2-AS1 | 7q21.3 | 101927525 |  |
| HGNC:40156 | COL4A2-AS1 | 13q34 | 100874203 | ENSG00000232814 |
| HGNC:31368 | COL5A1-AS1 | 9q34.3 | 414316 | ENSG00000204011 |
| HGNC:23132 | COL18A1-AS1 | 21q22.3 | 378832 | ENSG00000183535 |
| HGNC:40155 | COL18A1-AS2 | 21q22.3 | 100874236 | ENSG00000224574 |
| HGNC:2238 | COPG2IT1 | 7q32 | 53844 |  |
| HGNC:38873 | COX10-AS1 | 17p12 | 100874058 | ENSG00000236088 |
| HGNC:39898 | CPB2-AS1 | 13q14.13 | 100509894 | ENSG00000235903 |
| HGNC:27523 | CPEB1-AS1 | 15q25.2 | 283692 | ENSG00000259462 |
| HGNC:49082 | CPEB2-DT | 4p15.33-p15.32 | 441009 | ENSG00000247624 |
| HGNC:53937 | CPNE8-AS1 | 12q12 | 107984504 | ENSG00000257718 |
| HGNC:30102 | CPS1-IT1 | 2q34 | 29034 | ENSG00000280837 |
| HGNC:54057 | CRIM1-DT | 2p22.2 | 100288911 | ENSG00000260025 |
| HGNC:48962 | CRPPA-AS1 | 7p21.2 | 100506025 | ENSG00000229688 |
| HGNC:51433 | CRTC3-AS1 | 15q26.1 | 101926895 | ENSG00000259736 |
| HGNC:34405 | CRYM-AS1 | 16p12.2 | 400508 | ENSG00000189149 |
| HGNC:51232 | CSE1L-AS1 | 20q13.13 | 102723483 | ENSG00000227431 |
| HGNC:40882 | CSMD2-AS1 | 1p35.1 | 402779 | ENSG00000231163 |
| HGNC:28604 | CSNK1G2-AS1 | 19p13.3 | 255193 | ENSG00000180846 |
| HGNC:27882 | CSTF3-DT | 11p13 | 338739 | ENSG00000247151 |
| HGNC:48337 | CTBP1-AS | 4p16.3 | 285463 | ENSG00000280927 |
| HGNC:28307 | CTBP1-DT | 4p16.3 | 92070 | ENSG00000196810 |
| HGNC:41054 | CXXC4-AS1 | 4q24 | 101929468 | ENSG00000245384 |
| HGNC:53009 | CXXC5-AS1 | 5q31.2 | 111082989 | ENSG00000250635 |
| HGNC:52509 | CYMP-AS1 | 1p13.3 | 440602 | ENSG00000235407 |
| HGNC:28543 | CYP1B1-AS1 | 2p22.2 | 285154 | ENSG00000232973 |
| HGNC:43715 | CYP4A22-AS1 | 1p33 | 104355148 | ENSG00000225506 |
| HGNC:31671 | CYP17A1-AS1 | 10q24.32 | 102724307 | ENSG00000203886 |
| HGNC:50694 | CYP51A1-AS1 | 7q21.2 | 613126 | ENSG00000188693 |
| HGNC:28717 | CYTOR | 2p11.2 | 112597 | ENSG00000222041 |
| HGNC:39560 | CYYR1-AS1 | 21q21.3 | 100996571 | ENSG00000197934 |
| HGNC:49443 | DAB1-AS1 | 1p32.2 | 101926890 | ENSG00000226759 |
| HGNC:51902 | DACOR1 | 15q22.33 | 100131796 |  |
| HGNC:44120 | DACT3-AS1 | 19q13.32 | 100506068 | ENSG00000245598 |
| HGNC:51429 | DALIR | 2q12 | 104940698 |  |
| HGNC:28964 | DANCR | 4q12 | 57291 | ENSG00000226950 |
| HGNC:50863 | DANT1 | Xq23 | 106029310 | ENSG00000229335 |
| HGNC:50862 | DANT2 | Xq23 | 642776 | ENSG00000235244 |
| HGNC:30243 | DAOA-AS1 | 13q33.2 | 282706 | ENSG00000232307 |
| HGNC:43591 | DAPK1-IT1 | 9q21.33 | 100506897 | ENSG00000236709 |
| HGNC:40170 | DARS-AS1 | 2q21.3 | 101928243 | ENSG00000231890 |
| HGNC:43904 | DBET | 4q35.2 | 100419743 | ENSG00000281591 |
| HGNC:24155 | DBH-AS1 | 9q34.2 | 138948 | ENSG00000225756 |
| HGNC:41147 | DCST1-AS1 | 1q21.3 | 100505666 | ENSG00000232093 |
| HGNC:44151 | DCTN1-AS1 | 2p13.1 | 100189589 | ENSG00000237737 |
| HGNC:39889 | DCUN1D2-AS | 13q34 | 100874229 | ENSG00000233613 |
| HGNC:54083 | DCXR-DT | 17q25.3 | 113523640 | ENSG00000264569 |
| HGNC:40171 | DDC-AS1 | 7p12.1 | 100129427 | ENSG00000226122 |
| HGNC:52379 | DDIT4-AS1 | 10q22.1 | 110806271 | ENSG00000269926 |
| HGNC:53464 | DDN-AS1 | 12q13.12 | 105369758 | ENSG00000257913 |
| HGNC:28694 | DDR1-DT | 6p21.33 | 414771 | ENSG00000237775 |
| HGNC:44176 | DDX11-AS1 | 12p11.21 | 100506660 | ENSG00000245614 |
| HGNC:39771 | DDX39B-AS1 | 6p21.33 | 106478957 | ENSG00000234006 |
| HGNC:42517 | DENND5B-AS1 | 12p11.21 | 100874249 | ENSG00000255867 |
| HGNC:41152 | DENND6A-AS1 | 3p14.3 | 106144528 | ENSG00000239801 |
| HGNC:51592 | DENND6A-DT | 3p14.3 | 101929159 | ENSG00000241933 |
| HGNC:50592 | DEPDC1-AS1 | 1p31.3-p31.2 | 101927220 | ENSG00000234264 |
| HGNC:16757 | DGCR5 | 22q11.21 | 26220 | ENSG00000237517 |
| HGNC:17227 | DGCR9 | 22q11.21 | 25787 | ENSG00000273032 |
| HGNC:17864 | DGCR10 | 22q11.21 | 26222 | ENSG00000273164 |
| HGNC:17226 | DGCR11 | 22q11.21 | 25786 | ENSG00000273311 |
| HGNC:17225 | DGCR12 | 22q11.21 | 25784 |  |
| HGNC:43441 | DGUOK-AS1 | 2p13.1 | 100874048 | ENSG00000237883 |
| HGNC:53969 | DHCR24-DT | 1p32.3 | 107984958 | ENSG00000233203 |
| HGNC:23175 | DHRS4-AS1 | 14q11.2 | 55449 | ENSG00000215256 |
| HGNC:38713 | DHRSX-IT1 | Xp22.33 and Yp11 | 106478924 | ENSG00000223571 |
| HGNC:16972 | DIAPH2-AS1 | Xq21.33 | 10824 | ENSG00000236256 |
| HGNC:39915 | DIAPH3-AS1 | 13q21.2 | 100874195 | ENSG00000227528 |
| HGNC:39916 | DIAPH3-AS2 | 13q21.2 | 100874196 | ENSG00000223815 |
| HGNC:43017 | DICER1-AS1 | 14q32.13 | 400242 | ENSG00000235706 |
| HGNC:53146 | DINOL | 6p21.2 | 108783646 | ENSG00000285244 |
| HGNC:44153 | DIO2-AS1 | 14q31.1 | 100628307 | ENSG00000258766 |
| HGNC:20348 | DIO3OS | 14q32.31 | 64150 | ENSG00000258498 |
| HGNC:41430 | DIP2A-IT1 | 21q22.3 | 100862692 | ENSG00000223692 |
| HGNC:17805 | DIRC3 | 2q35 | 729582 | ENSG00000231672 |
| HGNC:50636 | DIRC3-AS1 | 2q35 | 105373877 | ENSG00000233143 |
| HGNC:41325 | DISC1-IT1 | 1q42.2 | 104472714 | ENSG00000226758 |
| HGNC:33625 | DISC1FP1 | 11q14.3 | 101929222 | ENSG00000261645 |
| HGNC:2889 | DISC2 | 1q42.1 | 27184 |  |
| HGNC:13747 | DLEU1 | 13q14.2-q14.3 | 10301 | ENSG00000176124 |
| HGNC:50496 | DLEU1-AS1 | 13q14.3 | 103689915 | ENSG00000229323 |
| HGNC:13748 | DLEU2 | 13q14.2 | 8847 | ENSG00000231607 |
| HGNC:39966 | DLEU7-AS1 | 13q14.3 | 100874074 | ENSG00000237152 |
| HGNC:44154 | DLG1-AS1 | 3q29 | 100507086 | ENSG00000227375 |
| HGNC:37132 | DLG2-AS1 | 11q14.1 | 100302690 |  |
| HGNC:40182 | DLG3-AS1 | Xq13.1 | 100873930 | ENSG00000231651 |
| HGNC:45109 | DLG5-AS1 | 10q22.3 | 100128292 | ENSG00000233871 |
| HGNC:31676 | DLGAP1-AS1 | 18p11.31 | 649446 | ENSG00000177337 |
| HGNC:28146 | DLGAP1-AS2 | 18p11.31 | 84777 | ENSG00000262001 |
| HGNC:27317 | DLGAP1-AS3 | 18p11.31 | 201477 | ENSG00000263724 |
| HGNC:44333 | DLGAP1-AS4 | 18p11.31 | 101410534 | ENSG00000263878 |
| HGNC:27586 | DLGAP1-AS5 | 18p11.31 | 284215 | ENSG00000261520 |
| HGNC:50467 | DLGAP2-AS1 | 8p23.3 | 100507435 | ENSG00000253267 |
| HGNC:51223 | DLGAP4-AS1 | 20q11.23 | 101926987 | ENSG00000232907 |
| HGNC:50638 | DLX2-DT | 2q31.1 | 104326193 | ENSG00000236651 |
| HGNC:37151 | DLX6-AS1 | 7q21.3 | 285987 | ENSG00000231764 |
| HGNC:40183 | DLX6-AS2 | 7q21.3 | 100873931 |  |
| HGNC:53125 | DM1-AS | 19q13.32 | 109729182 | ENSG00000267395 |
| HGNC:40185 | DMD-AS3 | Xp21.1 | 100873916 | ENSG00000236828 |
| HGNC:48594 | DNAH17-AS1 | 17q25.3 | 100996295 | ENSG00000267432 |
| HGNC:49846 | DNAJB5-DT | 9p13.3 | 101926900 | ENSG00000281491 |
| HGNC:41029 | DNAJB8-AS1 | 3q21.3 | 285224 | ENSG00000242049 |
| HGNC:39808 | DNAJC3-DT | 13q32.1 | 100289274 | ENSG00000247400 |
| HGNC:31432 | DNAJC9-AS1 | 10q22.2 | 414245 | ENSG00000236756 |
| HGNC:42943 | DNAJC27-AS1 | 2p23.3 | 729723 | ENSG00000224165 |
| HGNC:41494 | DNM3-IT1 | 1q24.3 | 100874284 | ENSG00000233540 |
| HGNC:41228 | DNM3OS | 1q24.3 | 100628315 | ENSG00000230630 |
| HGNC:20431 | DNMBP-AS1 | 10q24.2 | 100188954 | ENSG00000227695 |
| HGNC:40876 | DOCK4-AS1 | 7q31.1 | 100506413 | ENSG00000225572 |
| HGNC:40672 | DOCK9-AS1 | 13q32.3 | 100874096 | ENSG00000229918 |
| HGNC:43696 | DOCK9-DT | 13q32.3 | 100861541 | ENSG00000260992 |
| HGNC:44147 | DPH6-DT | 15q14 | 100507466 | ENSG00000248079 |
| HGNC:50706 | DPP9-AS1 | 19p13.3 | 100131094 | ENSG00000205790 |
| HGNC:40941 | DPP10-AS1 | 2q14.1 | 389023 | ENSG00000235026 |
| HGNC:40940 | DPP10-AS2 | 2q14.1 | 106478969 | ENSG00000235717 |
| HGNC:40939 | DPP10-AS3 | 2q14.1 | 101927591 | ENSG00000231538 |
| HGNC:40195 | DPYD-AS1 | 1p21.3 | 100873932 | ENSG00000232878 |
| HGNC:40196 | DPYD-AS2 | 1p21.3 | 100873933 | ENSG00000235777 |
| HGNC:41326 | DPYD-IT1 | 1p21.3 | 100874267 | ENSG00000232542 |
| HGNC:27082 | DRAIC | 15q23 | 145837 | ENSG00000245750 |
| HGNC:40197 | DSCAM-AS1 | 21q22.2 | 100506492 | ENSG00000235123 |
| HGNC:41327 | DSCAM-IT1 | 21q22.2 | 100874326 | ENSG00000233756 |
| HGNC:51116 | DSCAS | 18q12.1 | 101927698 | ENSG00000265888 |
| HGNC:3045 | DSCR4 | 21q22.13 | 10281 | ENSG00000184029 |
| HGNC:41328 | DSCR4-IT1 | 21q22.13 | 100874327 | ENSG00000223608 |
| HGNC:16707 | DSCR8 | 21q22.13 | 84677 | ENSG00000198054 |
| HGNC:16301 | DSCR9 | 21q22.13 | 257203 | ENSG00000230366 |
| HGNC:16302 | DSCR10 | 21q22.13 | 259234 | ENSG00000233316 |
| HGNC:51115 | DSG1-AS1 | 18q12.1 | 101927718 | ENSG00000266729 |
| HGNC:51311 | DSG2-AS1 | 18q12.1 | 100652770 | ENSG00000264859 |
| HGNC:48569 | DUBR | 3q13.12 | 344595 | ENSG00000243701 |
| HGNC:41329 | E2F3-IT1 | 6p22.3 | 100874268 | ENSG00000224707 |
| HGNC:42328 | EAF1-AS1 | 3p25.1 | 100873956 | ENSG00000249786 |
| HGNC:49045 | EDNRB-AS1 | 13q22.3 | 100505518 | ENSG00000225579 |
| HGNC:49501 | EDRF1-AS1 | 10q26.2 | 101927983 | ENSG00000236991 |
| HGNC:54128 | EDRF1-DT | 10q26.2 | 399821 | ENSG00000224023 |
| HGNC:39999 | EFCAB6-AS1 | 22q13.2 | 100874197 | ENSG00000223843 |
| HGNC:44108 | EFCAB14-AS1 | 1p33 | 100130197 | ENSG00000228237 |
| HGNC:41169 | EGFLAM-AS1 | 5p13.1 | 100874117 | ENSG00000249491 |
| HGNC:41168 | EGFLAM-AS2 | 5p13.2-p13.1 | 100506475 | ENSG00000248572 |
| HGNC:41167 | EGFLAM-AS3 | 5p13.2 | 100874116 | ENSG00000249071 |
| HGNC:41166 | EGFLAM-AS4 | 5p13.2 | 100852408 | ENSG00000248730 |
| HGNC:40207 | EGFR-AS1 | 7p11.2 | 100507500 | ENSG00000224057 |
| HGNC:49077 | EGLN3-AS1 | 14q13.1 | 105370445 | ENSG00000258897 |
| HGNC:37129 | EGOT | 3p26.1 | 100126791 | ENSG00000235947 |
| HGNC:51418 | EHD4-AS1 | 15q15.1 | 101928363 | ENSG00000259883 |
| HGNC:44133 | EHHADH-AS1 | 3q27.2 | 339926 | ENSG00000223358 |
| HGNC:39751 | EHMT2-AS1 | 6p21.33 | 106478954 | ENSG00000237080 |
| HGNC:40208 | EIF1AX-AS1 | Xp22.12 | 100874078 | ENSG00000225037 |
| HGNC:44555 | EIF1B-AS1 | 3p22.1 | 440952 | ENSG00000280739 |
| HGNC:54066 | EIF2AK3-DT | 2p11.2 | 101928403 | ENSG00000234028 |
| HGNC:48616 | EIF3J-DT | 15q21.1 | 645212 | ENSG00000179523 |
| HGNC:41392 | EIPR1-IT1 | 2p25.3 | 100874301 | ENSG00000224885 |
| HGNC:49511 | ELDR | 7p11.2 | 102725541 | ENSG00000280890 |
| HGNC:40211 | ELF3-AS1 | 1q32.1 | 102723465 | ENSG00000234678 |
| HGNC:39071 | ELFN1-AS1 | 7p22.3 | 101927125 | ENSG00000236081 |
| HGNC:40765 | ELMO1-AS1 | 7p14.2 | 100861514 | ENSG00000224101 |
| HGNC:40212 | ELN-AS1 | 7q11.23 | 107986809 | ENSG00000232415 |
| HGNC:50582 | ELOA-AS1 | 1p36.11 | 100506963 | ENSG00000236810 |
| HGNC:44156 | ELOVL2-AS1 | 6p24.2 | 100506409 | ENSG00000230314 |
| HGNC:54050 | EMC1-AS1 | 1p36.13 | 101927895 | ENSG00000230424 |
| HGNC:49223 | EMC3-AS1 | 3p25.3 | 442075 | ENSG00000180385 |
| HGNC:48331 | EML2-AS1 | 19q13.32 | 100287177 | ENSG00000267757 |
| HGNC:18511 | EMX2OS | 10q26.11 | 196047 | ENSG00000229847 |
| HGNC:40214 | ENO1-AS1 | 1p36.23 | 100505975 | ENSG00000230679 |
| HGNC:41331 | ENO1-IT1 | 1p36.23 | 106480431 | ENSG00000236269 |
| HGNC:42396 | ENOX1-AS1 | 13q14.11 | 100874129 | ENSG00000233821 |
| HGNC:42397 | ENOX1-AS2 | 13q14.11 | 100874130 | ENSG00000238189 |
| HGNC:45203 | ENTPD1-AS1 | 10q24.1 | 728558 | ENSG00000226688 |
| HGNC:26710 | ENTPD3-AS1 | 3p22.1 | 285266 | ENSG00000223797 |
| HGNC:50504 | EP300-AS1 | 22q13.2 | 101927279 | ENSG00000231993 |
| HGNC:30749 | EPB41L4A-AS1 | 5q22.1 | 114915 | ENSG00000224032 |
| HGNC:25643 | EPB41L4A-DT | 5q22.2 | 54508 | ENSG00000278921 |
| HGNC:52639 | EPCAM-DT | 2p21 | 101927043 | ENSG00000234690 |
| HGNC:27799 | EPHA1-AS1 | 7q35 | 285965 | ENSG00000229153 |
| HGNC:50602 | EPHA5-AS1 | 4q13.2 | 100144602 | ENSG00000250846 |
| HGNC:40849 | EPN2-AS1 | 17p11.2 | 100874018 | ENSG00000235397 |
| HGNC:41445 | EPN2-IT1 | 17p11.2 | 100874309 |  |
| HGNC:1229 | ERC2-IT1 | 3p14.3 | 711 | ENSG00000281708 |
| HGNC:41431 | ERI3-IT1 | 1p34.1 | 100874278 | ENSG00000233602 |
| HGNC:49404 | ERICD | 8q24.3 | 104355217 | ENSG00000280303 |
| HGNC:41093 | ERICH3-AS1 | 1p31.1 | 101927320 | ENSG00000234497 |
| HGNC:41205 | ERICH6-AS1 | 3q25.1 | 101928085 | ENSG00000240137 |
| HGNC:41109 | ERLNC1 | 1q32.1 | 101929441 | ENSG00000230550 |
| HGNC:39079 | ESRG | 3p14.3 | 790952 | ENSG00000265992 |
| HGNC:53932 | ETS1-AS1 | 11q24.3 | 101929517 | ENSG00000254588 |
| HGNC:40222 | ETV5-AS1 | 3q27.2 | 100873934 | ENSG00000234197 |
| HGNC:40223 | EVX1-AS | 7p15.2 | 101410536 | ENSG00000253405 |
| HGNC:26596 | EWSAT1 | 15q23 | 283673 | ENSG00000212766 |
| HGNC:25175 | EXOC3-AS1 | 5p15.33 | 116349 | ENSG00000221990 |
| HGNC:40456 | EXOSC10-AS1 | 1p36.22 | 105376736 | ENSG00000230337 |
| HGNC:27985 | EXTL3-AS1 | 8p21.1 | 101929402 | ENSG00000246339 |
| HGNC:40609 | EZR-AS1 | 6q25.3 | 101409257 | ENSG00000233893 |
| HGNC:40225 | F10-AS1 | 13q34 | 104413892 | ENSG00000231882 |
| HGNC:27725 | F11-AS1 | 4q35.2 | 285441 | ENSG00000251165 |
| HGNC:43713 | FALEC | 1q21.2 | 100874054 | ENSG00000228126 |
| HGNC:41276 | FAM3D-AS1 | 3p14.2 | 105377108 | ENSG00000244383 |
| HGNC:19370 | FAM13A-AS1 | 4q22.1 | 285512 | ENSG00000248019 |
| HGNC:23667 | FAM27B | 9q21.11 | 100133121 | ENSG00000278763 |
| HGNC:23668 | FAM27C | 9q13 | 100132948 | ENSG00000154537 |
| HGNC:32015 | FAM27D1 | 9p11.2 | 724094 |  |
| HGNC:32013 | FAM27E2 | 9p11.2 | 100289124 |  |
| HGNC:28655 | FAM27E3 | 9q21.11 | 100131997 | ENSG00000274026 |
| HGNC:44415 | FAM27E4 | 9q13 | 107987001 |  |
| HGNC:32410 | FAM27E5 | 17p11.2 | 284123 | ENSG00000178130 |
| HGNC:19955 | FAM30A | 14q32.33 | 9834 | ENSG00000226777 |
| HGNC:31023 | FAM30B | 15q11.1 | 105379202 | ENSG00000277988 |
| HGNC:31024 | FAM30C | 15q11.2 | 654499 | ENSG00000259698 |
| HGNC:23955 | FAM41AY1 | Yq11.222 | 340618 | ENSG00000224989 |
| HGNC:37135 | FAM41AY2 | Yq11.222 | 100302526 | ENSG00000226362 |
| HGNC:27635 | FAM41C | 1p36.33 | 284593 | ENSG00000230368 |
| HGNC:49499 | FAM53B-AS1 | 10q26.13 | 101927944 | ENSG00000233334 |
| HGNC:30444 | FAM66A | 8p23.1 | 100133172 | ENSG00000227888 |
| HGNC:28890 | FAM66B | 8p23.1 | 100128890 | ENSG00000215374 |
| HGNC:21644 | FAM66C | 12p13.31 | 440078 | ENSG00000226711 |
| HGNC:24159 | FAM66D | 8p23.1 | 100132923 | ENSG00000255052 |
| HGNC:18735 | FAM66E | 8p23.1 | 100132103 | ENSG00000225725 |
| HGNC:32029 | FAM74A1 | 9p12 | 401507 | ENSG00000215112 |
| HGNC:32031 | FAM74A3 | 9q21.11 | 728495 | ENSG00000274355 |
| HGNC:32032 | FAM74A4 | 9q12 | 401508 | ENSG00000274583 |
| HGNC:34036 | FAM74A6 | 9q12 | 653123 | ENSG00000274516 |
| HGNC:34037 | FAM74A7 | 9p11.2-p11.1 | 100996582 | ENSG00000277260 |
| HGNC:48658 | FAM83A-AS1 | 8q24.13 | 100131726 | ENSG00000204949 |
| HGNC:16113 | FAM83C-AS1 | 20q11.22 | 140846 | ENSG00000235214 |
| HGNC:48720 | FAM83H-AS1 | 8q24.3 | 100128338 |  |
| HGNC:27233 | FAM87A | 8p23.3 | 157693 | ENSG00000182366 |
| HGNC:32236 | FAM87B | 1p36.33 | 400728 | ENSG00000177757 |
| HGNC:28069 | FAM95A | 2q11.1 | 90499 |  |
| HGNC:32318 | FAM95B1 | 9p11.2 | 100133036 | ENSG00000223839 |
| HGNC:45272 | FAM95C | 9p13.1 | 100289137 | ENSG00000283486 |
| HGNC:32368 | FAM99A | 11p15.5 | 387742 | ENSG00000205866 |
| HGNC:32369 | FAM99B | 11p15.5 | 100132464 | ENSG00000205865 |
| HGNC:53752 | FAM111A-DT | 11q12.1 | 101927204 | ENSG00000245571 |
| HGNC:32334 | FAM138A | 1p36.33 | 645520 | ENSG00000237613 |
| HGNC:33582 | FAM138B | 2q14.1 | 654412 | ENSG00000226516 |
| HGNC:32333 | FAM138C | 9p24.3 | 654835 | ENSG00000218839 |
| HGNC:33583 | FAM138D | 12p13.33 | 677784 | ENSG00000249054 |
| HGNC:32335 | FAM138E | 15q26.3 | 100124412 | ENSG00000248893 |
| HGNC:33581 | FAM138F | 19p13.3 | 641702 | ENSG00000282591 |
| HGNC:41503 | FAM155A-IT1 | 13q33.3 | 100874375 | ENSG00000227248 |
| HGNC:34079 | FAM157A | 3q29 | 728262 | ENSG00000236438 |
| HGNC:34080 | FAM157B | 9q34.3 | 100132403 | ENSG00000233013 |
| HGNC:34081 | FAM157C | 16q24.3 | 100996541 | ENSG00000260528 |
| HGNC:53123 | FAM160A1-DT | 4q31.3 | 105377486 | ENSG00000251611 |
| HGNC:15548 | FAM167A-AS1 | 8p23.1 | 83656 | ENSG00000184608 |
| HGNC:45006 | FAM170B-AS1 | 10q11.23 | 100506733 | ENSG00000234736 |
| HGNC:20133 | FAM181A-AS1 | 14q32.12 | 283592 | ENSG00000258584 |
| HGNC:16222 | FAM182A | 20p11.1 | 284800 | ENSG00000125804 |
| HGNC:34503 | FAM182B | 20p11.1 | 728882 | ENSG00000175170 |
| HGNC:18848 | FAM197Y2 | Yp11.2 | 252946 | ENSG00000234803 |
| HGNC:37465 | FAM197Y3 | Yp11.2 | 107987341 | ENSG00000230066 |
| HGNC:37466 | FAM197Y4 | Yp11.2 | 100289188 | ENSG00000274196 |
| HGNC:37467 | FAM197Y5 | Yp11.2 | 100289150 | ENSG00000225516 |
| HGNC:37468 | FAM197Y6 | Yp11.2 | 105379270 | ENSG00000237802 |
| HGNC:37469 | FAM197Y7 | Yp11.2 | 105379269 | ENSG00000228383 |
| HGNC:37470 | FAM197Y8 | Yp11.2 | 105379268 | ENSG00000225560 |
| HGNC:37477 | FAM197Y9 | Yp11.2 | 100132932 | ENSG00000234830 |
| HGNC:53132 | FAM198B-AS1 | 4q32.1 | 285505 | ENSG00000248429 |
| HGNC:27239 | FAM201A | 9p13.1 | 158228 | ENSG00000204860 |
| HGNC:17505 | FAM215A | 17q21.31 | 23591 | ENSG00000267496 |
| HGNC:43639 | FAM215B | 17q21.31 | 644297 | ENSG00000232300 |
| HGNC:28223 | FAM222A-AS1 | 12q24.11 | 84983 | ENSG00000255650 |
| HGNC:30612 | FAM223A | Xq28 | 100132967 | ENSG00000279245 |
| HGNC:34048 | FAM223B | Xq28 | 286967 | ENSG00000272681 |
| HGNC:37736 | FAM224A | Yq11.222 | 401630 | ENSG00000233522 |
| HGNC:37737 | FAM224B | Yq11.222 | 401629 | ENSG00000230663 |
| HGNC:27855 | FAM225A | 9q32 | 286333 | ENSG00000231528 |
| HGNC:21865 | FAM225B | 9q32 | 100128385 | ENSG00000225684 |
| HGNC:28544 | FAM226A | Xq13.1 | 203429 |  |
| HGNC:31964 | FAM226B | Xq13.1 | 653687 | ENSG00000269911 |
| HGNC:45045 | FAM230A | 22q11.21 | 653203 | ENSG00000277870 |
| HGNC:32943 | FAM230B | 22q11.21 | 642633 | ENSG00000215498 |
| HGNC:24482 | FAM230C | 13q11 | 26080 | ENSG00000279516 |
| HGNC:53910 | FAM230D | 22q11.21 | 100996415 | ENSG00000187979 |
| HGNC:52450 | FAM230E | 22q11.21 | 642643 | ENSG00000182824 |
| HGNC:52451 | FAM230F | 22q11.21 | 100996432 | ENSG00000276095 |
| HGNC:52423 | FAM230G | 22q11.21 | 101927859 | ENSG00000188280 |
| HGNC:53977 | FAM230H | 22q11.21 | 100996335 | ENSG00000206142 |
| HGNC:52446 | FAM230I | 22q11.23 | 388882 | ENSG00000178248 |
| HGNC:52448 | FAM230J | 22q11.21 | 729461 | ENSG00000274044 |
| HGNC:17776 | FAM238A | 10p12.1 | 645528 | ENSG00000233261 |
| HGNC:44917 | FAM238B | 10p12.1 | 731789 | ENSG00000231976 |
| HGNC:24672 | FAM238C | 10p12.1 | 387644 | ENSG00000283709 |
| HGNC:53414 | FAM239A | Xp22.33 | 101930105 | ENSG00000234449 |
| HGNC:53415 | FAM239B | Xp22.33 | 729162 | ENSG00000205663 |
| HGNC:53416 | FAM239C | Xp22.33 | 107987330 | ENSG00000205662 |
| HGNC:51597 | FAM242A | 20q11.1 | 105372587 | ENSG00000231934 |
| HGNC:53872 | FAM242B | 20q11.1 | 105379478 |  |
| HGNC:53873 | FAM242C | 12q13.13 | 112488744 | ENSG00000250432 |
| HGNC:53874 | FAM242D | 9q13 | 112488742 | ENSG00000231248 |
| HGNC:53875 | FAM242E | 9q13 | 105379438 | ENSG00000229697 |
| HGNC:53876 | FAM242F | 9p11.2 | 105376064 | ENSG00000275239 |
| HGNC:45163 | FAM245A | 10q23.2 | 728218 | ENSG00000228055 |
| HGNC:54133 | FAM245B | 10q11.22 | 102724643 | ENSG00000285662 |
| HGNC:43915 | FANK1-AS1 | 10q26.2 | 101410540 | ENSG00000233409 |
| HGNC:41485 | FAR1-IT1 | 11p15.3 | 106478978 | ENSG00000254791 |
| HGNC:40229 | FARP1-AS1 | 13q32.2 | 100874080 | ENSG00000231194 |
| HGNC:50479 | FARSA-AS1 | 19p13.13 | 106144598 | ENSG00000266975 |
| HGNC:37128 | FAS-AS1 | 10q23.31 | 100302740 |  |
| HGNC:27557 | FBXL19-AS1 | 16p11.2 | 283932 | ENSG00000260852 |
| HGNC:51147 | FBXO3-DT | 11p13 | 101928440 | ENSG00000254508 |
| HGNC:41489 | FBXO36-IT1 | 2q36.3 | 100874344 | ENSG00000231534 |
| HGNC:52397 | FBXW7-AS1 | 4q31.3 | 102191832 | ENSG00000270751 |
| HGNC:43894 | FENDRR | 16q24.1 | 400550 | ENSG00000268388 |
| HGNC:26652 | FER1L6-AS1 | 8q24.13 | 439941 | ENSG00000181171 |
| HGNC:26534 | FER1L6-AS2 | 8q24.13 | 157376 | ENSG00000253868 |
| HGNC:41001 | FEZF1-AS1 | 7q31.32 | 154860 | ENSG00000230316 |
| HGNC:40410 | FGD5-AS1 | 3p25.1 | 100505641 | ENSG00000225733 |
| HGNC:49382 | FGF10-AS1 | 5p12 | 101927075 | ENSG00000248464 |
| HGNC:40234 | FGF12-AS1 | 3q28 | 100873986 | ENSG00000231383 |
| HGNC:40235 | FGF12-AS2 | 3q28 | 100873987 | ENSG00000230126 |
| HGNC:40236 | FGF12-AS3 | 3q28 | 100873988 | ENSG00000226709 |
| HGNC:44264 | FGF13-AS1 | Xq26.3 | 100129662 | ENSG00000226031 |
| HGNC:40237 | FGF14-AS1 | 13q33.1 | 100874081 | ENSG00000234445 |
| HGNC:44368 | FGF14-AS2 | 13q33.1 | 283481 | ENSG00000272143 |
| HGNC:42774 | FGF14-IT1 | 13q33.1 | 283480 | ENSG00000243319 |
| HGNC:53755 | FILNC1 | 6q24.1 | 100132735 | ENSG00000231426 |
| HGNC:49627 | FIRRE | Xq26.2 | 286467 | ENSG00000213468 |
| HGNC:27913 | FLG-AS1 | 1q21.3 | 339400 | ENSG00000237975 |
| HGNC:53589 | FLICR | Xp11.23 | 110437700 |  |
| HGNC:40239 | FLNB-AS1 | 3p14.3 | 105377105 | ENSG00000244161 |
| HGNC:53474 | FLNC-AS1 | 7q32.1 | 110806300 | ENSG00000242902 |
| HGNC:39077 | FLVCR1-DT | 1q32.3 | 642946 | ENSG00000198468 |
| HGNC:39081 | FMR1-AS1 | Xq27.3 | 100126270 | ENSG00000268066 |
| HGNC:41333 | FMR1-IT1 | Xq27.3 | 106478973 | ENSG00000236337 |
| HGNC:41460 | FNDC1-IT1 | 6q25.3 | 100874312 | ENSG00000235086 |
| HGNC:49789 | FOCAD-AS1 | 9p21.3 | 101929548 | ENSG00000227071 |
| HGNC:50665 | FOXC2-AS1 | 16q24.1 | 103752587 | ENSG00000260944 |
| HGNC:50650 | FOXCUT | 6p25.3 | 101927703 | ENSG00000280916 |
| HGNC:50658 | FOXD1-AS1 | 5q13.2 | 106144539 | ENSG00000247993 |
| HGNC:44256 | FOXD2-AS1 | 1p33 | 84793 | ENSG00000237424 |
| HGNC:40241 | FOXD3-AS1 | 1p31.3 | 100996301 | ENSG00000230798 |
| HGNC:50663 | FOXG1-AS1 | 14q12 | 103695363 | ENSG00000257126 |
| HGNC:44290 | FOXN3-AS1 | 14q32.11 | 400236 | ENSG00000258920 |
| HGNC:30119 | FOXN3-AS2 | 14q32.11 | 29018 | ENSG00000259073 |
| HGNC:41942 | FOXP1-AS1 | 3p13 | 104502416 | ENSG00000244203 |
| HGNC:41335 | FOXP1-IT1 | 3p13 | 100506815 | ENSG00000242094 |
| HGNC:50332 | FOXP4-AS1 | 6p21.1 | 101060264 | ENSG00000234753 |
| HGNC:39964 | FREM2-AS1 | 13q13.3 | 100874073 | ENSG00000225350 |
| HGNC:51590 | FRG1-DT | 4q35.2 | 728339 | ENSG00000245685 |
| HGNC:51844 | FRGCA | 21q22.3 | 106481742 | ENSG00000236663 |
| HGNC:20129 | FRMD6-AS1 | 14q22.1 | 145438 | ENSG00000273888 |
| HGNC:43637 | FRMD6-AS2 | 14q22.1 | 100874185 | ENSG00000258537 |
| HGNC:41239 | FRMPD3-AS1 | Xq22.3 | 100874122 | ENSG00000227610 |
| HGNC:41222 | FRMPD4-AS1 | Xp22.2 | 100874121 | ENSG00000223487 |
| HGNC:39725 | FRY-AS1 | 13q13.1 | 100507099 | ENSG00000237637 |
| HGNC:40978 | FSIP2-AS1 | 2q32.1 | 107985781 | ENSG00000231646 |
| HGNC:54061 | FSIP2-AS2 | 2q32.1 | 101927196 | ENSG00000226747 |
| HGNC:40243 | FTCD-AS1 | 21q22.3 | 100861507 | ENSG00000237338 |
| HGNC:43758 | FTO-IT1 | 16q12.2 | 100505692 |  |
| HGNC:37190 | FTX | Xq13.2 | 100302692 | ENSG00000230590 |
| HGNC:44294 | FUT8-AS1 | 14q23.3 | 645431 | ENSG00000276116 |
| HGNC:48632 | FZD10-AS1 | 12q24.33 | 440119 | ENSG00000250208 |
| HGNC:53463 | G2E3-AS1 | 14q12 | 105370431 | ENSG00000257636 |
| HGNC:44157 | GABPB1-AS1 | 15q21.2 | 100129387 | ENSG00000244879 |
| HGNC:25469 | GABPB1-IT1 | 15q21.2 | 55056 | ENSG00000285410 |
| HGNC:40249 | GABRG3-AS1 | 15q12 | 101928869 | ENSG00000228740 |
| HGNC:48336 | GACAT1 | 2q12.3 | 104326057 | ENSG00000232991 |
| HGNC:50516 | GACAT2 | 18p11.22 | 100287082 | ENSG00000265962 |
| HGNC:50847 | GACAT3 | 2p24.3 | 104797537 | ENSG00000236289 |
| HGNC:54079 | GALNTL6-AS1 | 4q34.1 | 101928314 |  |
| HGNC:51308 | GAPLINC | 18p11.31 | 100505592 | ENSG00000266835 |
| HGNC:48951 | GARS-DT | 7p14.3 | 401320 | ENSG00000196295 |
| HGNC:52261 | GAS1RR | 9q21.33 | 100506834 | ENSG00000226237 |
| HGNC:16355 | GAS5 | 1q25.1 | 60674 | ENSG00000234741 |
| HGNC:44119 | GAS5-AS1 | 1q25.1 | 100506046 | ENSG00000270084 |
| HGNC:39826 | GAS6-AS1 | 13q34 | 650669 | ENSG00000233695 |
| HGNC:43694 | GAS6-DT | 13q34 | 100506394 | ENSG00000272695 |
| HGNC:1197 | GAS8-AS1 | 16q24.3 | 750 | ENSG00000221819 |
| HGNC:53461 | GASAL1 | 8q22.3 | 401472 | ENSG00000253669 |
| HGNC:51108 | GATA2-AS1 | 3q21.3 | 101927167 | ENSG00000244300 |
| HGNC:33786 | GATA3-AS1 | 10p14 | 399717 | ENSG00000197308 |
| HGNC:48840 | GATA6-AS1 | 18q11.2 | 100128893 | ENSG00000266010 |
| HGNC:53880 | GAU1 | 12p13.32 | 101929549 | ENSG00000255474 |
| HGNC:52281 | GCASPC | 6q25.3 | 112441427 | ENSG00000224073 |
| HGNC:28126 | GCC2-AS1 | 2q12.3 | 644903 | ENSG00000214184 |
| HGNC:41244 | GCSAML-AS1 | 1q44 | 148824 | ENSG00000284824 |
| HGNC:43592 | GDNF-AS1 | 5p13.2 | 100861519 | ENSG00000248587 |
| HGNC:53773 | GEMIN7-AS1 | 19q13.32 | 105372419 | ENSG00000267348 |
| HGNC:40956 | GFOD1-AS1 | 6p23 | 100874025 | ENSG00000237786 |
| HGNC:49425 | GHET1 | 7q36.1 | 102723099 | ENSG00000281189 |
| HGNC:33885 | GHRLOS | 3p25.3 | 100126793 | ENSG00000240288 |
| HGNC:52649 | GIHCG | 12q14.1 | 100506844 | ENSG00000257698 |
| HGNC:40255 | GK-AS1 | Xp21.2 | 100873902 | ENSG00000243055 |
| HGNC:41339 | GK-IT1 | Xp21.2 | 106480740 | ENSG00000229331 |
| HGNC:48823 | GLIDR | 9p12 | 389741 | ENSG00000278175 |
| HGNC:51381 | GLIS2-AS1 | 16p13.3 | 101926896 | ENSG00000262686 |
| HGNC:28260 | GLIS3-AS1 | 9p24.2 | 84850 | ENSG00000237009 |
| HGNC:41043 | GLYCTK-AS1 | 3p21.1 | 100874110 | ENSG00000242797 |
| HGNC:48993 | GMDS-DT | 6p25.3-p25.2 | 100508120 | ENSG00000250903 |
| HGNC:50451 | GNA14-AS1 | 9q21.2 | 101927422 | ENSG00000231373 |
| HGNC:24872 | GNAS-AS1 | 20q13.32 | 149775 | ENSG00000235590 |
| HGNC:43938 | GNG12-AS1 | 1p31.3 | 100289178 | ENSG00000232284 |
| HGNC:54051 | GORAB-AS1 | 1q24.2 | 101928650 | ENSG00000231407 |
| HGNC:52897 | GPC3-AS1 | Xq26.2 | 110806308 |  |
| HGNC:39886 | GPC5-AS1 | 13q31.3 | 100873969 | ENSG00000235984 |
| HGNC:39887 | GPC5-AS2 | 13q31.3 | 100873970 | ENSG00000232885 |
| HGNC:41340 | GPC5-IT1 | 13q31.3 | 100874293 | ENSG00000236240 |
| HGNC:39909 | GPC6-AS1 | 13q31.3 | 100873972 | ENSG00000236520 |
| HGNC:39910 | GPC6-AS2 | 13q31.3 | 100873973 | ENSG00000224394 |
| HGNC:48602 | GPR1-AS | 2q33.3 | 101669764 | ENSG00000279220 |
| HGNC:40259 | GPR50-AS1 | Xq28 | 100128688 | ENSG00000234696 |
| HGNC:44163 | GPR158-AS1 | 10p12.1 | 100128811 | ENSG00000233642 |
| HGNC:53957 | GPRACR | 9q34.11 | 401554 | ENSG00000196979 |
| HGNC:53599 | GPRC5D-AS1 | 12p13.1 | 100506314 | ENSG00000247498 |
| HGNC:32680 | GRASP-AS1 | 12q13.13 | 692159 |  |
| HGNC:44131 | GRID1-AS1 | 10q23.1 | 100507470 | ENSG00000234942 |
| HGNC:16458 | GRIK1-AS1 | 21q21.3 | 642976 | ENSG00000174680 |
| HGNC:1282 | GRIK1-AS2 | 21q22.11 | 100379661 |  |
| HGNC:49478 | GRK5-IT1 | 10q26.11 | 101927868 | ENSG00000228485 |
| HGNC:40265 | GRM5-AS1 | 11q14.2 | 100873989 | ENSG00000255082 |
| HGNC:40267 | GRM7-AS1 | 3p26.1 | 100873937 | ENSG00000236202 |
| HGNC:40266 | GRM7-AS2 | 3p26.1 | 105376946 | ENSG00000237665 |
| HGNC:42444 | GRM7-AS3 | 3p26.1 | 101927347 | ENSG00000226258 |
| HGNC:48999 | GRPEL2-AS1 | 5q32 | 106144529 | ENSG00000253618 |
| HGNC:39917 | GRTP1-AS1 | 13q34 | 100874068 | ENSG00000225083 |
| HGNC:53074 | GSC-DT | 14q32.13 | 108868751 |  |
| HGNC:48645 | GSEC | 11q24.2 | 399972 | ENSG00000280832 |
| HGNC:23372 | GSN-AS1 | 9q33.2 | 57000 | ENSG00000235865 |
| HGNC:40269 | GTF3C2-AS1 | 2p23.3 | 100505624 | ENSG00000234945 |
| HGNC:27163 | GTSE1-DT | 22q13.31 | 150384 | ENSG00000277232 |
| HGNC:40270 | GYG2-AS1 | Xp22.33 | 100873938 | ENSG00000235483 |
| HGNC:27953 | H1FX-AS1 | 3q21.3 | 339942 | ENSG00000206417 |
| HGNC:4713 | H19 | 11p15.5 | 283120 | ENSG00000130600 |
| HGNC:43755 | HAGLR | 2q31.1 | 401022 | ENSG00000224189 |
| HGNC:50646 | HAGLROS | 2q31.1 | 102800310 | ENSG00000226363 |
| HGNC:48872 | HAND2-AS1 | 4q34.1 | 79804 | ENSG00000237125 |
| HGNC:41342 | HAO2-IT1 | 1p12 | 100874270 | ENSG00000230921 |
| HGNC:33117 | HAR1A | 20q13.33 | 768096 | ENSG00000225978 |
| HGNC:33118 | HAR1B | 20q13.33 | 768097 | ENSG00000231133 |
| HGNC:34340 | HAS2-AS1 | 8q24.13 | 594842 | ENSG00000248690 |
| HGNC:48612 | HCCAT5 | 16q22.3 | 283902 | ENSG00000260880 |
| HGNC:40273 | HCFC1-AS1 | Xq28 | 100873990 | ENSG00000235802 |
| HGNC:21241 | HCG4 | 6p22.1 | 54435 | ENSG00000176998 |
| HGNC:22919 | HCG4B | 6p22.1 | 80868 | ENSG00000227262 |
| HGNC:21243 | HCG9 | 6p22.1 | 10255 | ENSG00000204625 |
| HGNC:17707 | HCG11 | 6p22.2 | 493812 | ENSG00000228223 |
| HGNC:18323 | HCG14 | 6p22.1 | 414760 | ENSG00000224157 |
| HGNC:18361 | HCG15 | 6p21 | 414761 | ENSG00000227214 |
| HGNC:31339 | HCG17 | 6p22.1 | 414778 | ENSG00000270604 |
| HGNC:31337 | HCG18 | 6p22.1 | 414777 | ENSG00000231074 |
| HGNC:31334 | HCG20 | 6p21 | 105375013 | ENSG00000228022 |
| HGNC:31335 | HCG21 | 6p21 | 102723346 | ENSG00000233529 |
| HGNC:19713 | HCG23 | 6p21.32 | 414764 |  |
| HGNC:23500 | HCG24 | 6p21 | 414768 | ENSG00000230313 |
| HGNC:20196 | HCG25 | 6p21.32 | 414765 | ENSG00000232940 |
| HGNC:29671 | HCG26 | 6p21.3 | 352961 |  |
| HGNC:27366 | HCG27 | 6p21.33 | 253018 | ENSG00000206344 |
| HGNC:21659 | HCP5 | 6p21.33 | 10866 | ENSG00000206337 |
| HGNC:30984 | HCP5B | 6p21.3 | 352990 |  |
| HGNC:43590 | HDAC2-AS2 | 6q21-q22.1 | 101927768 | ENSG00000228624 |
| HGNC:54064 | HDAC4-AS1 | 2q37.3 | 101928111 | ENSG00000222020 |
| HGNC:40868 | HDAC11-AS1 | 3p25.1 | 100874101 | ENSG00000244502 |
| HGNC:1842 | HDHD5-AS1 | 22q11.1 | 100130717 | ENSG00000185837 |
| HGNC:48679 | HECTD2-AS1 | 10q23.32 | 100188947 |  |
| HGNC:41465 | HECW1-IT1 | 7p14.1 | 100127950 | ENSG00000181211 |
| HGNC:54062 | HECW2-AS1 | 2q32.3 | 101927482 | ENSG00000229056 |
| HGNC:45049 | HEIH | 5q35.3 | 100859930 | ENSG00000278970 |
| HGNC:43984 | HELLPAR | 12q23.2 | 101101692 | ENSG00000281344 |
| HGNC:25810 | HEXA-AS1 | 15q23 | 80072 | ENSG00000260339 |
| HGNC:43650 | HEXD-IT1 | 17q25.3 | 100505970 | ENSG00000279066 |
| HGNC:42439 | HHATL-AS1 | 3p22.1 | 100874044 | ENSG00000230970 |
| HGNC:44182 | HHIP-AS1 | 4q31.21 | 646576 | ENSG00000248890 |
| HGNC:51181 | HID1-AS1 | 17q25.1 | 102723641 | ENSG00000263586 |
| HGNC:43014 | HIF1A-AS1 | 14q23.2 | 100750246 | ENSG00000258777 |
| HGNC:43015 | HIF1A-AS2 | 14q23.2 | 100750247 | ENSG00000258667 |
| HGNC:50576 | HIPK1-AS1 | 1p13.2 | 101928846 | ENSG00000235527 |
| HGNC:39762 | HLA-DQB1-AS1 | 6p21.32 | 106480429 | ENSG00000223534 |
| HGNC:26645 | HLA-F-AS1 | 6p22.1 | 285830 | ENSG00000214922 |
| HGNC:41343 | HLCS-IT1 | 21q22.13 | 100874294 | ENSG00000237646 |
| HGNC:40554 | HLTF-AS1 | 3q24 | 100873945 | ENSG00000239718 |
| HGNC:42509 | HLX-AS1 | 1q41 | 100873924 | ENSG00000257551 |
| HGNC:41940 | HM13-AS1 | 20q11.21 | 100874042 | ENSG00000230613 |
| HGNC:41424 | HM13-IT1 | 20q11.21 | 106480432 | ENSG00000235313 |
| HGNC:43632 | HMBOX1-IT1 | 8p12 | 106481795 | ENSG00000259196 |
| HGNC:53973 | HMGA2-AS1 | 12q14.3 | 100129940 | ENSG00000197301 |
| HGNC:48984 | HMGN3-AS1 | 6q14.1 | 100288198 | ENSG00000270362 |
| HGNC:49149 | HMMR-AS1 | 5q34 | 101927813 | ENSG00000251018 |
| HGNC:26785 | HNF1A-AS1 | 12q24.31 | 283460 | ENSG00000241388 |
| HGNC:49505 | HNF4A-AS1 | 20q13.12 | 101927219 | ENSG00000229005 |
| HGNC:53775 | HOMER3-AS1 | 19p13.11 | 102724360 | ENSG00000269019 |
| HGNC:50729 | HORMAD2-AS1 | 22q12.2 | 101929664 | ENSG00000227117 |
| HGNC:33510 | HOTAIR | 12q13.13 | 100124700 | ENSG00000228630 |
| HGNC:37117 | HOTAIRM1 | 7p15.2 | 100506311 | ENSG00000233429 |
| HGNC:37461 | HOTTIP | 7p15.2 | 100316868 | ENSG00000243766 |
| HGNC:43745 | HOXA-AS2 | 7p15.2 | 285943 | ENSG00000253552 |
| HGNC:43748 | HOXA-AS3 | 7p15.2 | 100133311 | ENSG00000254369 |
| HGNC:40281 | HOXA10-AS | 7p15.2 | 100874323 | ENSG00000253187 |
| HGNC:24957 | HOXA11-AS | 7p15.2 | 221883 | ENSG00000240990 |
| HGNC:43744 | HOXB-AS1 | 17q21.32 | 100874362 | ENSG00000230148 |
| HGNC:40284 | HOXB-AS2 | 17q21.32 | 100874350 | ENSG00000239552 |
| HGNC:40283 | HOXB-AS3 | 17q21.32 | 404266 | ENSG00000233101 |
| HGNC:40285 | HOXB-AS4 | 17q21.32 | 100874351 | ENSG00000242207 |
| HGNC:43749 | HOXC-AS1 | 12q13.13 | 100874363 | ENSG00000250451 |
| HGNC:43750 | HOXC-AS2 | 12q13.13 | 100874364 | ENSG00000250133 |
| HGNC:43751 | HOXC-AS3 | 12q13.13 | 100874365 | ENSG00000251151 |
| HGNC:43753 | HOXC13-AS | 12q13.13 | 100874366 | ENSG00000249641 |
| HGNC:43756 | HOXD-AS2 | 2q31.1 | 100506783 | ENSG00000237380 |
| HGNC:47041 | HPN-AS1 | 19q13.11-q13.12 | 100128675 | ENSG00000227392 |
| HGNC:16071 | HPYR1 | 8q24.22 | 93668 | ENSG00000253521 |
| HGNC:41474 | HS1BP3-IT1 | 2p24.1 | 100874343 | ENSG00000231948 |
| HGNC:40870 | HS6ST2-AS1 | Xq26.2 | 100874102 | ENSG00000235849 |
| HGNC:54053 | HSD11B1-AS1 | 1q32.2 | 101930114 | ENSG00000227591 |
| HGNC:53136 | HSD17B3-AS1 | 9q22.32 | 105376162 | ENSG00000232283 |
| HGNC:40289 | HTR2A-AS1 | 13q14.2 | 100874082 | ENSG00000224517 |
| HGNC:41032 | HTR3E-AS1 | 3q27.1 | 106478970 | ENSG00000238020 |
| HGNC:48956 | HTR5A-AS1 | 7q36.2 | 100128264 | ENSG00000220575 |
| HGNC:37118 | HTT-AS | 4p16.3 | 100750326 | ENSG00000251075 |
| HGNC:34232 | HULC | 6p24.3 | 728655 | ENSG00000251164 |
| HGNC:40631 | HUNK-AS1 | 21q22.11 | 106144524 | ENSG00000237138 |
| HGNC:41173 | HYI-AS1 | 1p34.2 | 100873923 | ENSG00000229348 |
| HGNC:5326 | HYMAI | 6q24.2 | 57061 | ENSG00000283122 |
| HGNC:53719 | IATPR | 10p11.22 | 101929447 | ENSG00000233387 |
| HGNC:32062 | IBA57-DT | 1q42.13 | 574432 | ENSG00000203684 |
| HGNC:51103 | ID2-AS1 | 2p25.1 | 100506299 | ENSG00000235092 |
| HGNC:40292 | IDH1-AS1 | 2q34 | 100507475 | ENSG00000231908 |
| HGNC:53154 | IDH2-DT | 15q26.1 | 105370966 | ENSG00000259685 |
| HGNC:30885 | IDI2-AS1 | 10p15.3 | 55853 | ENSG00000232656 |
| HGNC:53629 | IER3-AS1 | 6p21.33 | 105379695 | ENSG00000272273 |
| HGNC:43910 | IFNG-AS1 | 12q15 | 100885789 | ENSG00000255733 |
| HGNC:49806 | IFT74-AS1 | 9p21.2 | 101929602 | ENSG00000234676 |
| HGNC:40295 | IGBP1-AS1 | Xq13.1 | 100873991 | ENSG00000203588 |
| HGNC:40294 | IGBP1-AS2 | Xq13.1 | 106478965 | ENSG00000220925 |
| HGNC:14062 | IGF2-AS | 11p15.5 | 51214 | ENSG00000099869 |
| HGNC:32674 | IGF2BP2-AS1 | 3q27.2 | 646600 | ENSG00000163915 |
| HGNC:40296 | IGFBP7-AS1 | 4q12 | 255130 | ENSG00000245067 |
| HGNC:52559 | IGFL2-AS1 | 19q13.32 | 645553 | ENSG00000268621 |
| HGNC:40777 | IGSF11-AS1 | 3q13.32 | 100506765 | ENSG00000239877 |
| HGNC:41190 | IGSF21-AS1 | 1p36.13 | 105376814 | ENSG00000230035 |
| HGNC:53898 | IL1R1-AS1 | 2q12.1 | 112577460 | ENSG00000226925 |
| HGNC:53716 | IL6R-AS1 | 1q21.3 | 101928101 | ENSG00000228013 |
| HGNC:44303 | IL10RB-DT | 21q22.11 | 100288432 | ENSG00000223799 |
| HGNC:49094 | IL12A-AS1 | 3q25.33 | 101928376 | ENSG00000244040 |
| HGNC:40298 | IL20RB-AS1 | 3q22.3 | 107986136 | ENSG00000249407 |
| HGNC:40299 | IL21-AS1 | 4q27 | 100996941 | ENSG00000227145 |
| HGNC:27551 | IL21R-AS1 | 16p12.1 | 283888 | ENSG00000259954 |
| HGNC:27115 | ILF3-DT | 19p13.2 | 147727 | ENSG00000267100 |
| HGNC:6060 | INE1 | Xp11.3 | 8552 | ENSG00000224975 |
| HGNC:6061 | INE2 | Xp22.2 | 8551 | ENSG00000281371 |
| HGNC:40303 | INHBA-AS1 | 7p14.1 | 285954 | ENSG00000224116 |
| HGNC:49446 | INKA2-AS1 | 1p13.2 | 100506343 | ENSG00000227811 |
| HGNC:53138 | INO80-AS1 | 15q15.1 | 109729177 | ENSG00000259521 |
| HGNC:51422 | INSYN1-AS1 | 15q24.1 | 101929221 | ENSG00000260469 |
| HGNC:42691 | INTS6-AS1 | 13q14.3 | 100507398 | ENSG00000236778 |
| HGNC:41180 | INTS6L-AS1 | Xq26.3 | 100874118 | ENSG00000225235 |
| HGNC:53139 | INTS9-AS1 | 8p21.1 | 109729178 | ENSG00000254034 |
| HGNC:40892 | IPO9-AS1 | 1q32.1 | 100873949 | ENSG00000231871 |
| HGNC:6109 | IPW | 15q11.2 | 3653 |  |
| HGNC:41137 | IQCA1-AS1 | 2q37 | 107080627 | ENSG00000232893 |
| HGNC:41297 | IQCF5-AS1 | 3p21.2 | 101928999 | ENSG00000235455 |
| HGNC:44104 | IQCH-AS1 | 15q23 | 100506686 | ENSG00000259673 |
| HGNC:41303 | IQCJ-SCHIP1-AS1 | 3q25.33 | 100874433 | ENSG00000241211 |
| HGNC:50365 | IRAIN | 15q26.3 | 104472848 | ENSG00000259424 |
| HGNC:44313 | ISM1-AS1 | 20p12.1 | 100505536 | ENSG00000226263 |
| HGNC:41188 | ISX-AS1 | 22q12.3 | 101926957 | ENSG00000227895 |
| HGNC:40659 | ITCH-AS1 | 20q11.22 | 106480737 | ENSG00000236388 |
| HGNC:41397 | ITCH-IT1 | 20q11.22 | 100874302 | ENSG00000231795 |
| HGNC:51383 | ITFG1-AS1 | 16q12.1 | 101927102 | ENSG00000260281 |
| HGNC:53128 | ITFG2-AS1 | 12p13.33 | 283440 | ENSG00000258325 |
| HGNC:40308 | ITGA6-AS1 | 2q31.1 | 101929947 | ENSG00000232788 |
| HGNC:49668 | ITGA9-AS1 | 3p22.2 | 101928153 | ENSG00000235257 |
| HGNC:53718 | ITGB1-DT | 10p11.22 | 101929475 | ENSG00000229656 |
| HGNC:44304 | ITGB2-AS1 | 21q22.3 | 100505746 | ENSG00000227039 |
| HGNC:40309 | ITGB5-AS1 | 3q21.2 | 100873992 | ENSG00000244286 |
| HGNC:40310 | ITIH4-AS1 | 3p21.1 | 100873993 | ENSG00000239799 |
| HGNC:20132 | ITPK1-AS1 | 14q32.12 | 319085 | ENSG00000258730 |
| HGNC:40312 | ITPKB-AS1 | 1q42.12 | 100873994 | ENSG00000228548 |
| HGNC:41349 | ITPKB-IT1 | 1q42.12 | 100506443 | ENSG00000228382 |
| HGNC:44470 | ITPR1-DT | 3p26.1 | 100996539 | ENSG00000231249 |
| HGNC:54100 | ITPRIP-AS1 | 10q25.1 | 101927472 | ENSG00000228261 |
| HGNC:48601 | JADRR | 4q28.2 | 101669763 | ENSG00000280711 |
| HGNC:27203 | JAKMIP2-AS1 | 5q32 | 153469 | ENSG00000280780 |
| HGNC:40314 | JARID2-AS1 | 6p22.3 | 100506681 | ENSG00000235488 |
| HGNC:41218 | JAZF1-AS1 | 7p15.1 | 100128081 | ENSG00000234336 |
| HGNC:28222 | JMJD1C-AS1 | 10q21.3 | 84989 | ENSG00000272767 |
| HGNC:37191 | JPX | Xq13.2 | 554203 | ENSG00000225470 |
| HGNC:43670 | JRKL-AS1 | 11q21 | 100874053 | ENSG00000255679 |
| HGNC:43740 | KANSL1-AS1 | 17q21.31 | 644246 | ENSG00000214401 |
| HGNC:53610 | KAZN-AS1 | 1p36.21 | 105376762 | ENSG00000234593 |
| HGNC:49147 | KBTBD11-OT1 | 8p23.3 | 104266957 | ENSG00000253696 |
| HGNC:40316 | KCNAB1-AS1 | 3q25.31 | 100874084 | ENSG00000242370 |
| HGNC:40315 | KCNAB1-AS2 | 3q25.31 | 100874083 | ENSG00000240596 |
| HGNC:40317 | KCND3-AS1 | 1p13.2 | 100873995 | ENSG00000237556 |
| HGNC:41350 | KCND3-IT1 | 1p13.2 | 100874295 | ENSG00000232558 |
| HGNC:41351 | KCNH1-IT1 | 1q32.2 | 100874296 | ENSG00000234233 |
| HGNC:48680 | KCNIP2-AS1 | 10q24.32 | 100289509 | ENSG00000226009 |
| HGNC:29895 | KCNIP4-IT1 | 4p15.2 | 359822 | ENSG00000280650 |
| HGNC:43720 | KCNJ2-AS1 | 17q24.3 | 400617 | ENSG00000267365 |
| HGNC:41352 | KCNJ6-AS1 | 21q22.13 | 105372799 | ENSG00000233213 |
| HGNC:49901 | KCNK15-AS1 | 20q13.12 | 106144538 | ENSG00000244558 |
| HGNC:51213 | KCNMA1-AS1 | 10q22.3 | 101929328 | ENSG00000236467 |
| HGNC:51214 | KCNMA1-AS2 | 10q22.3 | 101929310 | ENSG00000225497 |
| HGNC:51215 | KCNMA1-AS3 | 10q22.3 | 101929286 | ENSG00000225652 |
| HGNC:51409 | KCNMB2-AS1 | 3q26.32 | 104797538 | ENSG00000237978 |
| HGNC:42790 | KCNQ1-AS1 | 11p15.4 | 338653 | ENSG00000229414 |
| HGNC:13335 | KCNQ1DN | 11p15.4 | 55539 | ENSG00000237941 |
| HGNC:6295 | KCNQ1OT1 | 11p15.5 | 10984 | ENSG00000269821 |
| HGNC:40323 | KCNQ5-AS1 | 6q13 | 100873997 | ENSG00000229154 |
| HGNC:41354 | KCNQ5-IT1 | 6q13 | 100507381 | ENSG00000233844 |
| HGNC:48674 | KCTD21-AS1 | 11q14.1 | 100289388 | ENSG00000246174 |
| HGNC:40528 | KDM4A-AS1 | 1p34.2-p34.1 | 100132774 | ENSG00000236200 |
| HGNC:41384 | KDM5C-IT1 | Xp11.22 | 100874299 | ENSG00000235262 |
| HGNC:48959 | KDM7A-DT | 7q34 | 100134229 | ENSG00000260231 |
| HGNC:53911 | KHDRBS2-OT | 6q11.1 | 112577463 | ENSG00000250686 |
| HGNC:22191 | KIAA0087 | 7p15.2 | 9808 | ENSG00000122548 |
| HGNC:50644 | KIAA1614-AS1 | 1q25.3 | 103344928 | ENSG00000232586 |
| HGNC:41164 | KIAA2012-AS1 | 2q33.1 | 729224 | ENSG00000222035 |
| HGNC:26822 | KIF9-AS1 | 3p21.31 | 285352 | ENSG00000227398 |
| HGNC:20953 | KIF25-AS1 | 6q27 | 100505879 | ENSG00000229921 |
| HGNC:41098 | KIF26B-AS1 | 1q44 | 111216275 | ENSG00000232192 |
| HGNC:41412 | KIRREL1-IT1 | 1q23.1 | 100505785 | ENSG00000226520 |
| HGNC:42655 | KIRREL3-AS1 | 11q24.2 | 100874250 | ENSG00000257271 |
| HGNC:42656 | KIRREL3-AS2 | 11q24.2 | 100874251 | ENSG00000254960 |
| HGNC:26855 | KIRREL3-AS3 | 11q24.2 | 283165 | ENSG00000218109 |
| HGNC:51231 | KIZ-AS1 | 20p11.23 | 101929591 | ENSG00000232712 |
| HGNC:25796 | KLF3-AS1 | 4p14 | 79667 | ENSG00000231160 |
| HGNC:41355 | KLF7-IT1 | 2q33.3 | 100874272 | ENSG00000237892 |
| HGNC:40850 | KLHL6-AS1 | 3q27.1 | 100874019 | ENSG00000242522 |
| HGNC:43431 | KLHL7-DT | 7p15.3 | 100775104 | ENSG00000230658 |
| HGNC:31018 | KLHL30-AS1 | 2q37.3 | 394261 | ENSG00000279484 |
| HGNC:40845 | KMT2E-AS1 | 7q22.3 | 100216545 | ENSG00000239569 |
| HGNC:42942 | KRBOX1-AS1 | 3p22.1 | 100506275 | ENSG00000206552 |
| HGNC:52643 | KRT7-AS | 12q13.13 | 109729127 | ENSG00000257671 |
| HGNC:49607 | KRT73-AS1 | 12q13.13 | 100127967 | ENSG00000257495 |
| HGNC:27877 | KRTAP5-AS1 | 11p15.5 | 338651 | ENSG00000233930 |
| HGNC:19842 | KTN1-AS1 | 14q22.3 | 100129075 | ENSG00000186615 |
| HGNC:51320 | L3MBTL4-AS1 | 18p11.31 | 101927150 | ENSG00000264707 |
| HGNC:27841 | LACTB2-AS1 | 8q13.3 | 286190 | ENSG00000246366 |
| HGNC:40334 | LAMA5-AS1 | 20q13.33 | 101928158 | ENSG00000228812 |
| HGNC:52645 | LAMC1-AS1 | 1q25.3 | 110841583 | ENSG00000224468 |
| HGNC:40754 | LAMP5-AS1 | 20p12.2 | 101929329 | ENSG00000225988 |
| HGNC:40823 | LAMTOR5-AS1 | 1p13.3 | 101410535 | ENSG00000224699 |
| HGNC:50727 | LANCL1-AS1 | 2q34 | 102724820 | ENSG00000234281 |
| HGNC:40336 | LARGE-AS1 | 22q12.3 | 100506195 | ENSG00000224973 |
| HGNC:41357 | LARGE-IT1 | 22q12.3 | 100874331 | ENSG00000232081 |
| HGNC:40796 | LARS2-AS1 | 3p21.31 | 100885795 | ENSG00000232455 |
| HGNC:39912 | LATS2-AS1 | 13q12.11 | 100874066 | ENSG00000233851 |
| HGNC:48678 | LBX1-AS1 | 10q24.32 | 399806 | ENSG00000227128 |
| HGNC:25136 | LBX2-AS1 | 2p13.1 | 151534 | ENSG00000257702 |
| HGNC:25837 | LCAL1 | 6q14.1 | 80078 |  |
| HGNC:51177 | LCMT1-AS1 | 16p12.1 | 102723510 | ENSG00000260448 |
| HGNC:51178 | LCMT1-AS2 | 16p12.1 | 100506655 | ENSG00000260034 |
| HGNC:48592 | LDLRAD4-AS1 | 18p11.21 | 100288122 | ENSG00000267690 |
| HGNC:40339 | LEF1-AS1 | 4q25 | 641518 | ENSG00000232021 |
| HGNC:44132 | LEMD1-AS1 | 1q32.1 | 284576 | ENSG00000226235 |
| HGNC:40705 | LENG8-AS1 | 19q13.42 | 104355426 | ENSG00000226696 |
| HGNC:40340 | LGALS8-AS1 | 1q43 | 100287902 | ENSG00000223776 |
| HGNC:53951 | LGALSL-DT | 2p14 | 105374771 | ENSG00000223935 |
| HGNC:40341 | LHFPL3-AS1 | 7q22.2 | 645591 | ENSG00000226869 |
| HGNC:44106 | LHFPL3-AS2 | 7q22.3 | 723809 | ENSG00000225329 |
| HGNC:53778 | LHX1-DT | 17q12 | 102723471 | ENSG00000277268 |
| HGNC:40982 | LHX4-AS1 | 1q25.2 | 100527964 |  |
| HGNC:49570 | LHX5-AS1 | 12q24.13 | 104355219 | ENSG00000257935 |
| HGNC:53473 | LIF-AS1 | 22q12.2 | 110806283 | ENSG00000232530 |
| HGNC:43600 | LIFR-AS1 | 5p13.1 | 100506495 | ENSG00000244968 |
| HGNC:53114 | LILRB1-AS1 | 19q13.42 | 109729136 | ENSG00000224730 |
| HGNC:44107 | LIMD1-AS1 | 3p21.31 | 644714 | ENSG00000230530 |
| HGNC:40342 | LIMS1-AS1 | 2q12.3 | 106182118 | ENSG00000228763 |
| HGNC:21553 | LIN28B-AS1 | 6q16.3 | 100113403 | ENSG00000203809 |
| HGNC:26885 | LINC-PINT | 7q32.3 | 378805 | ENSG00000231721 |
| HGNC:43773 | LINC-ROR | 18q21.31 | 100885779 | ENSG00000258609 |
| HGNC:16224 | LINC00028 | 20q11.21 | 140875 | ENSG00000233354 |
| HGNC:16184 | LINC00029 | 20q13.33 | 100144596 | ENSG00000125514 |
| HGNC:16506 | LINC00032 | 9p21.2 | 158035 | ENSG00000283945 |
| HGNC:32028 | LINC00051 | 8q24.3 | 619434 | ENSG00000254008 |
| HGNC:26455 | LINC00052 | 15q25.3 | 145978 | ENSG00000259527 |
| HGNC:31408 | LINC00092 | 9q22.32 | 100188953 | ENSG00000225194 |
| HGNC:30470 | LINC00102 | Xp22.33 and Yp11.31 | 100359394 | ENSG00000230542 |
| HGNC:31843 | LINC00106 | Xp22.33 and Yp11.32 | 751580 | ENSG00000236871 |
| HGNC:1262 | LINC00111 | 21q22.3 | 54090 | ENSG00000227702 |
| HGNC:1263 | LINC00112 | 21q22.3 | 54089 | ENSG00000232401 |
| HGNC:1264 | LINC00113 | 21q21.3 | 54088 | ENSG00000225298 |
| HGNC:1265 | LINC00114 | 21q22.2 | 400866 | ENSG00000223806 |
| HGNC:26211 | LINC00115 | 1p36.33 | 79854 | ENSG00000225880 |
| HGNC:1283 | LINC00158 | 21q21.2 | 54072 | ENSG00000185433 |
| HGNC:1285 | LINC00159 | 21q22.11 | 100551499 | ENSG00000230323 |
| HGNC:1294 | LINC00160 | 21q22.12 | 54064 | ENSG00000230978 |
| HGNC:17138 | LINC00161 | 21q21.3 | 118421 | ENSG00000226935 |
| HGNC:33165 | LINC00163 | 21q22.3 | 727699 | ENSG00000234880 |
| HGNC:33166 | LINC00165 | 21q22.3 | 727701 | ENSG00000261706 |
| HGNC:30468 | LINC00167 | 11q24.3 | 440072 | ENSG00000233220 |
| HGNC:33791 | LINC00173 | 12q24.22 | 100287569 | ENSG00000196668 |
| HGNC:27788 | LINC00174 | 7q11.21 | 285908 | ENSG00000179406 |
| HGNC:37192 | LINC00184 | 1q42.3 | 100302691 | ENSG00000224939 |
| HGNC:18461 | LINC00189 | 21q21.3 | 193629 | ENSG00000215533 |
| HGNC:30974 | LINC00200 | 10p15.3 | 399706 | ENSG00000229205 |
| HGNC:16420 | LINC00205 | 21q22.3 | 102723489 | ENSG00000223768 |
| HGNC:37255 | LINC00207 | 22q13.31 | 388910 | ENSG00000187012 |
| HGNC:15535 | LINC00208 | 8p23.1 | 83655 | ENSG00000170983 |
| HGNC:37458 | LINC00210 | 1q41 | 100885798 | ENSG00000231814 |
| HGNC:37459 | LINC00211 | 2p22.2 | 101929559 | ENSG00000237803 |
| HGNC:20191 | LINC00216 | 14q22.3 | 55451 |  |
| HGNC:20169 | LINC00221 | 14q32.33 | 338005 | ENSG00000270816 |
| HGNC:21560 | LINC00222 | 6q21 | 387111 | ENSG00000203801 |
| HGNC:20168 | LINC00226 | 14q32.33 | 338004 | ENSG00000276210 |
| HGNC:13240 | LINC00229 | 22q13.3 | 414351 | ENSG00000234300 |
| HGNC:14138 | LINC00235 | 16p13.3 | 64493 | ENSG00000277142 |
| HGNC:38166 | LINC00237 | 20p11.23 | 105372556 | ENSG00000225127 |
| HGNC:20119 | LINC00239 | 14q32.31 | 145200 | ENSG00000258512 |
| HGNC:18772 | LINC00240 | 6p22.2 | 100133205 | ENSG00000224843 |
| HGNC:21249 | LINC00242 | 6q27 | 401288 | ENSG00000229214 |
| HGNC:30956 | LINC00243 | 6p21.33 | 401247 | ENSG00000214894 |
| HGNC:13245 | LINC00244 | 7q36 | 64433 | ENSG00000279418 |
| HGNC:31950 | LINC00251 | 8q13.1 | 552859 | ENSG00000280725 |
| HGNC:14160 | LINC00254 | 16p13.3 | 64735 | ENSG00000281219 |
| HGNC:28770 | LINC00260 | 1q32.1 | 84719 |  |
| HGNC:16189 | LINC00261 | 20p11.21 | 140828 | ENSG00000259974 |
| HGNC:28019 | LINC00265 | 7p14.1 | 349114 | ENSG00000188185 |
| HGNC:16202 | LINC00266-1 | 20q13.33 | 140849 | ENSG00000149656 |
| HGNC:21112 | LINC00266-3 | 6p25.3 | 441123 | ENSG00000170590 |
| HGNC:38543 | LINC00268 | 9p11.2 | 441426 |  |
| HGNC:26586 | LINC00269 | Xq13.1 | 100996279 | ENSG00000215162 |
| HGNC:32526 | LINC00271 | 6q23.3 | 100131814 | ENSG00000231028 |
| HGNC:26898 | LINC00272 | 1q25.3 | 388719 | ENSG00000203729 |
| HGNC:38595 | LINC00273 | 16p11.2 | 649159 | ENSG00000256642 |
| HGNC:38663 | LINC00276 | 2p24.3 | 100499171 | ENSG00000230448 |
| HGNC:38712 | LINC00278 | Yp11.31 | 100873962 | ENSG00000231535 |
| HGNC:38724 | LINC00279 | Yp11.2 | 100873963 | ENSG00000232348 |
| HGNC:38803 | LINC00280 | Yp11.2 | 100873964 | ENSG00000229643 |
| HGNC:38809 | LINC00283 | 13q33.1 | 100874057 | ENSG00000231633 |
| HGNC:26981 | LINC00284 | 13q14.11 | 121838 | ENSG00000233725 |
| HGNC:38515 | LINC00290 | 4q34.3 | 728081 | ENSG00000248197 |
| HGNC:39078 | LINC00293 | 8q11.1 | 497634 | ENSG00000253314 |
| HGNC:27456 | LINC00294 | 11p13 | 283267 | ENSG00000280798 |
| HGNC:39210 | LINC00297 | 13q12.3 | 100874059 | ENSG00000224329 |
| HGNC:49257 | LINC00298 | 2p25.1 | 339788 | ENSG00000235665 |
| HGNC:27940 | LINC00299 | 2p25.1 | 339789 | ENSG00000236790 |
| HGNC:28603 | LINC00301 | 11q12.2 | 283197 | ENSG00000181995 |
| HGNC:31825 | LINC00302 | 1q21.3 | 388699 | ENSG00000176075 |
| HGNC:26865 | LINC00303 | 1q32.1 | 284573 | ENSG00000176754 |
| HGNC:26713 | LINC00304 | 16q24.3 | 283860 | ENSG00000180422 |
| HGNC:28597 | LINC00305 | 18q22.1 | 221241 | ENSG00000179676 |
| HGNC:16727 | LINC00307 | 21q22.11 | 266919 | ENSG00000227342 |
| HGNC:16023 | LINC00308 | 21q21.1 | 54143 | ENSG00000184856 |
| HGNC:25279 | LINC00309 | 2p14 | 150992 | ENSG00000230923 |
| HGNC:16414 | LINC00310 | 21q22.11 | 114036 | ENSG00000227456 |
| HGNC:28312 | LINC00311 | 16q24.1 | 197196 | ENSG00000179219 |
| HGNC:6662 | LINC00312 | 3p25.3 | 29931 |  |
| HGNC:16416 | LINC00313 | 21q22.3 | 114038 | ENSG00000185186 |
| HGNC:16622 | LINC00314 | 21q21.3 | 246705 | ENSG00000178457 |
| HGNC:16621 | LINC00315 | 21q22.3 | 246704 | ENSG00000184274 |
| HGNC:19723 | LINC00316 | 21q22.3 | 388830 | ENSG00000237664 |
| HGNC:23126 | LINC00317 | 21q21.1 | 378828 | ENSG00000238265 |
| HGNC:19730 | LINC00319 | 21q22.3 | 284836 | ENSG00000188660 |
| HGNC:19690 | LINC00320 | 21q21.1 | 387486 | ENSG00000224924 |
| HGNC:33698 | LINC00322 | 21q22.3 | 100126693 | ENSG00000237864 |
| HGNC:19720 | LINC00323 | 21q22.2 | 284835 | ENSG00000226496 |
| HGNC:26628 | LINC00324 | 17p13.1 | 284029 | ENSG00000178977 |
| HGNC:41926 | LINC00326 | 6q23.2 | 285735 | ENSG00000231023 |
| HGNC:42009 | LINC00327 | 13q12.12 | 100506697 | ENSG00000232977 |
| HGNC:42028 | LINC00328 | 21p11.2 | 51152 |  |
| HGNC:42047 | LINC00330 | 13q14.12 | 144817 | ENSG00000235097 |
| HGNC:42048 | LINC00331 | 13q31.1 | 100874126 | ENSG00000225427 |
| HGNC:42049 | LINC00332 | 13q14.11 | 100874127 | ENSG00000230710 |
| HGNC:42050 | LINC00333 | 13q31.1 | 100874128 | ENSG00000233349 |
| HGNC:16425 | LINC00334 | 21q22.3 | 114042 | ENSG00000182586 |
| HGNC:33813 | LINC00336 | 6p21.31 | 401253 | ENSG00000197251 |
| HGNC:28620 | LINC00337 | 1p36.31 | 148645 | ENSG00000225077 |
| HGNC:25011 | LINC00339 | 1p36.12 | 29092 | ENSG00000218510 |
| HGNC:42470 | LINC00342 | 2q11.1 | 150759 | ENSG00000232931 |
| HGNC:42500 | LINC00343 | 13q33.2 | 144920 | ENSG00000226620 |
| HGNC:42503 | LINC00345 | 13q14.3 | 105370208 | ENSG00000235660 |
| HGNC:27492 | LINC00346 | 13q34 | 283487 | ENSG00000255874 |
| HGNC:27890 | LINC00347 | 13q22.1 | 338864 | ENSG00000236678 |
| HGNC:42658 | LINC00348 | 13q21.33 | 100885781 | ENSG00000226846 |
| HGNC:42667 | LINC00349 | 13q11 | 100874135 | ENSG00000231238 |
| HGNC:42668 | LINC00350 | 13q12.11 | 100874136 | ENSG00000225316 |
| HGNC:42669 | LINC00351 | 13q31.1 | 100874137 | ENSG00000226317 |
| HGNC:42670 | LINC00352 | 13q12.12 | 100874138 | ENSG00000227893 |
| HGNC:42671 | LINC00353 | 13q31.3 | 100874139 | ENSG00000236176 |
| HGNC:42672 | LINC00354 | 13q34 | 101928616 | ENSG00000226903 |
| HGNC:27061 | LINC00355 | 13q21.31 | 144766 | ENSG00000227674 |
| HGNC:42678 | LINC00358 | 13q21.31 | 100874143 | ENSG00000229578 |
| HGNC:42679 | LINC00359 | 13q32.1 | 100887754 | ENSG00000243300 |
| HGNC:42682 | LINC00362 | 13q12.12 | 100874144 | ENSG00000229483 |
| HGNC:42684 | LINC00363 | 13q31.3 | 104326053 | ENSG00000232849 |
| HGNC:42686 | LINC00364 | 13q21.32 | 100874145 | ENSG00000230040 |
| HGNC:42687 | LINC00365 | 13q12.3 | 100874146 | ENSG00000224511 |
| HGNC:42688 | LINC00366 | 13q13.3 | 100874147 | ENSG00000229437 |
| HGNC:42689 | LINC00367 | 13q12.11 | 101930748 |  |
| HGNC:42690 | LINC00368 | 13q34 | 101927802 | ENSG00000225870 |
| HGNC:42692 | LINC00370 | 13q33.3 | 105370357 | ENSG00000223617 |
| HGNC:42695 | LINC00373 | 13q31.2 | 105370306 | ENSG00000231019 |
| HGNC:42698 | LINC00374 | 13q21.1 | 106144531 | ENSG00000232954 |
| HGNC:42699 | LINC00375 | 13q31.1 | 104355140 | ENSG00000226370 |
| HGNC:42701 | LINC00376 | 13q21.31 | 104355293 | ENSG00000227564 |
| HGNC:42703 | LINC00377 | 13q31.1 | 103724386 | ENSG00000229246 |
| HGNC:42704 | LINC00378 | 13q21.2 | 101926930 | ENSG00000225249 |
| HGNC:42705 | LINC00379 | 13q31.3 | 100874150 | ENSG00000229557 |
| HGNC:42706 | LINC00380 | 13q31.3 | 101930747 | ENSG00000234625 |
| HGNC:42708 | LINC00381 | 13q22.1 | 100874151 | ENSG00000226240 |
| HGNC:42709 | LINC00382 | 13q31.1 | 101927195 | ENSG00000229175 |
| HGNC:42710 | LINC00383 | 13q21.33 | 103689913 | ENSG00000237534 |
| HGNC:42711 | LINC00384 | 13q12.3 | 102157400 | ENSG00000232117 |
| HGNC:42713 | LINC00385 | 13q12.3 | 105370141 | ENSG00000232643 |
| HGNC:42715 | LINC00387 | 13q11 | 100874152 | ENSG00000231914 |
| HGNC:42716 | LINC00388 | 13q11 | 100874153 | ENSG00000229788 |
| HGNC:42718 | LINC00390 | 13q14.11 | 105370183 | ENSG00000226519 |
| HGNC:42719 | LINC00391 | 13q32.1 | 100874154 | ENSG00000238230 |
| HGNC:42720 | LINC00392 | 13q22.1 | 100874155 | ENSG00000228295 |
| HGNC:42721 | LINC00393 | 13q22.1 | 100874156 | ENSG00000224853 |
| HGNC:42723 | LINC00395 | 13q21.31 | 100874157 | ENSG00000231061 |
| HGNC:42724 | LINC00396 | 13q34 | 104355146 | ENSG00000231428 |
| HGNC:42725 | LINC00397 | 13q31.2 | 101930749 | ENSG00000223404 |
| HGNC:42727 | LINC00398 | 13q12.3 | 100874158 | ENSG00000237879 |
| HGNC:42728 | LINC00399 | 13q33.3 | 104326054 | ENSG00000229792 |
| HGNC:42729 | LINC00400 | 13q14.11 | 100874159 | ENSG00000229928 |
| HGNC:42732 | LINC00402 | 13q22.1 | 100507612 | ENSG00000235532 |
| HGNC:42734 | LINC00404 | 13q34 | 100874160 | ENSG00000229520 |
| HGNC:42739 | LINC00407 | 13q14.12 | 106144541 | ENSG00000237585 |
| HGNC:42740 | LINC00408 | 13q12.11 | 100652856 | ENSG00000226250 |
| HGNC:42742 | LINC00410 | 13q31.3 | 144776 | ENSG00000231674 |
| HGNC:42744 | LINC00411 | 13q32.3 | 100874161 | ENSG00000229599 |
| HGNC:42745 | LINC00412 | 13q12.2 | 102723332 | ENSG00000234772 |
| HGNC:42748 | LINC00415 | 13q12.13 | 107984009 | ENSG00000231983 |
| HGNC:42755 | LINC00421 | 13q12.11 | 100287114 | ENSG00000236834 |
| HGNC:42758 | LINC00423 | 13q13.1 | 100874167 | ENSG00000226968 |
| HGNC:42815 | LINC00424 | 13q12.11 | 100874182 | ENSG00000226722 |
| HGNC:42761 | LINC00426 | 13q12.3 | 100188949 | ENSG00000238121 |
| HGNC:42762 | LINC00427 | 13q12.3 | 100507040 | ENSG00000236463 |
| HGNC:42763 | LINC00428 | 13q14.11 | 104355147 | ENSG00000229546 |
| HGNC:42765 | LINC00430 | 13q31.1 | 106144533 | ENSG00000233528 |
| HGNC:42766 | LINC00431 | 13q34 | 104355135 | ENSG00000225760 |
| HGNC:42768 | LINC00433 | 13q31.2 | 100874168 | ENSG00000229443 |
| HGNC:42769 | LINC00434 | 13q21.2 | 100874169 | ENSG00000227336 |
| HGNC:42772 | LINC00437 | 13q13.3 | 101929121 | ENSG00000236354 |
| HGNC:42777 | LINC00440 | 13q31.2 | 100874172 | ENSG00000234660 |
| HGNC:42779 | LINC00442 | 13q12.11 | 348021 | ENSG00000232685 |
| HGNC:42780 | LINC00443 | 13q33.3 | 100874173 | ENSG00000230156 |
| HGNC:42781 | LINC00444 | 13q14.2 | 107984570 | ENSG00000234689 |
| HGNC:42782 | LINC00445 | 13q13.3 | 100507114 | ENSG00000236036 |
| HGNC:42783 | LINC00446 | 13q22.3 | 100874175 | ENSG00000229249 |
| HGNC:42785 | LINC00448 | 13q21.31 | 100874176 | ENSG00000228669 |
| HGNC:42786 | LINC00449 | 13q32.3 | 106478991 | ENSG00000203441 |
| HGNC:42802 | LINC00454 | 13q34 | 100874178 | ENSG00000226921 |
| HGNC:42804 | LINC00456 | 13q32.1 | 103625683 | ENSG00000233124 |
| HGNC:42805 | LINC00457 | 13q13.2 | 100874179 | ENSG00000225179 |
| HGNC:42807 | LINC00458 | 13q14.3 | 100507428 | ENSG00000234787 |
| HGNC:42808 | LINC00459 | 13q21.31 | 100874180 | ENSG00000229307 |
| HGNC:42809 | LINC00460 | 13q33.2 | 728192 | ENSG00000233532 |
| HGNC:42810 | LINC00461 | 5q14.3 | 645323 | ENSG00000245526 |
| HGNC:42811 | LINC00462 | 13q14.2 | 100129597 | ENSG00000233610 |
| HGNC:42813 | LINC00463 | 13q12.13 | 101928922 | ENSG00000234056 |
| HGNC:27294 | LINC00466 | 1p31.3 | 199899 | ENSG00000224209 |
| HGNC:28227 | LINC00467 | 1q32.3 | 84791 | ENSG00000153363 |
| HGNC:26863 | LINC00469 | 17q25.1 | 283982 | ENSG00000177338 |
| HGNC:1225 | LINC00470 | 18p11.32 | 56651 | ENSG00000132204 |
| HGNC:28668 | LINC00471 | 2q37.1 | 151477 | ENSG00000181798 |
| HGNC:21380 | LINC00472 | 6q13 | 79940 | ENSG00000233237 |
| HGNC:21160 | LINC00473 | 6q27 | 90632 | ENSG00000223414 |
| HGNC:23367 | LINC00474 | 9q33.1 | 58483 | ENSG00000204148 |
| HGNC:23569 | LINC00475 | 9q22.31 | 158314 | ENSG00000225511 |
| HGNC:27858 | LINC00476 | 9q22.32 | 100128782 | ENSG00000175611 |
| HGNC:26557 | LINC00477 | 12p12.1 | 144360 | ENSG00000197503 |
| HGNC:19727 | LINC00479 | 21q22.3 | 150135 | ENSG00000236384 |
| HGNC:26816 | LINC00482 | 17q25.3 | 284185 | ENSG00000185168 |
| HGNC:27862 | LINC00484 | 9q22.2 | 100129347 | ENSG00000235641 |
| HGNC:27476 | LINC00485 | 12q23.2 | 283432 | ENSG00000258169 |
| HGNC:42946 | LINC00486 | 2p22.3 | 285045 | ENSG00000230876 |
| HGNC:42947 | LINC00487 | 2p25.2 | 400941 | ENSG00000205837 |
| HGNC:32675 | LINC00488 | 3q13.13 | 677779 | ENSG00000214381 |
| HGNC:43426 | LINC00489 | 20q11.23 | 100861522 | ENSG00000225759 |
| HGNC:43428 | LINC00491 | 5q21.1 | 285708 | ENSG00000250682 |
| HGNC:43429 | LINC00492 | 5q21.1 | 100861468 | ENSG00000250958 |
| HGNC:27657 | LINC00494 | 20q13.13 | 284749 | ENSG00000235621 |
| HGNC:43435 | LINC00498 | 4q28.3 | 105377446 | ENSG00000248397 |
| HGNC:43436 | LINC00499 | 4q28.3 | 100874047 | ENSG00000251372 |
| HGNC:43437 | LINC00500 | 4q28.3 | 106480440 | ENSG00000249381 |
| HGNC:43439 | LINC00501 | 3q26.32 | 100820709 | ENSG00000203645 |
| HGNC:43442 | LINC00502 | 10q23.31 | 100874184 | ENSG00000224851 |
| HGNC:43555 | LINC00504 | 4p15.33 | 201853 | ENSG00000248360 |
| HGNC:43557 | LINC00506 | 3p12.1 | 100846978 |  |
| HGNC:43558 | LINC00507 | 12q24.32 | 100862680 | ENSG00000256193 |
| HGNC:43559 | LINC00508 | 12q24.32 | 104472718 | ENSG00000256971 |
| HGNC:43564 | LINC00511 | 17q24.3 | 400619 | ENSG00000227036 |
| HGNC:43566 | LINC00513 | 7q32.3 | 100506860 | ENSG00000233559 |
| HGNC:27549 | LINC00514 | 16p13.3 | 283875 | ENSG00000262152 |
| HGNC:16019 | LINC00515 | 21q21.3 | 282566 |  |
| HGNC:19831 | LINC00517 | 14q21.1 | 400208 | ENSG00000259091 |
| HGNC:28626 | LINC00518 | 6p24.3 | 221718 | ENSG00000183674 |
| HGNC:19838 | LINC00519 | 14q22.1 | 161342 | ENSG00000258955 |
| HGNC:19843 | LINC00520 | 14q22.3 | 645687 | ENSG00000258791 |
| HGNC:20117 | LINC00523 | 14q32.2 | 283601 | ENSG00000196273 |
| HGNC:20118 | LINC00524 | 14q32.31 | 338002 | ENSG00000259023 |
| HGNC:40290 | LINC00525 | 7p12.3 | 84847 | ENSG00000146666 |
| HGNC:28278 | LINC00526 | 18p11.31 | 147525 | ENSG00000264575 |
| HGNC:17215 | LINC00527 | 21q22.2 | 54748 |  |
| HGNC:26875 | LINC00528 | 22q11.21 | 200298 | ENSG00000269220 |
| HGNC:15544 | LINC00529 | 8p23-p22 | 83647 | ENSG00000236827 |
| HGNC:18690 | LINC00533 | 6p22.1 | 387055 | ENSG00000235570 |
| HGNC:43643 | LINC00534 | 8q21.3 | 100874052 | ENSG00000253394 |
| HGNC:43644 | LINC00535 | 8q22.1 | 642924 | ENSG00000246662 |
| HGNC:43645 | LINC00536 | 8q23.3 | 100859921 | ENSG00000249917 |
| HGNC:43654 | LINC00537 | 9q13 | 203274 |  |
| HGNC:43655 | LINC00538 | 1q32.3 | 100861504 | ENSG00000281664 |
| HGNC:43672 | LINC00539 | 13q12.11 | 100652865 | ENSG00000224429 |
| HGNC:43673 | LINC00540 | 13q12.11 | 100506622 |  |
| HGNC:43678 | LINC00543 | 13q12.2 | 100132234 | ENSG00000260704 |
| HGNC:43679 | LINC00544 | 13q12.3 | 440131 | ENSG00000122043 |
| HGNC:43680 | LINC00545 | 13q12.3 | 440132 | ENSG00000236094 |
| HGNC:43682 | LINC00547 | 13q13.3 | 400121 | ENSG00000275226 |
| HGNC:43683 | LINC00548 | 13q14.11 | 400123 |  |
| HGNC:43688 | LINC00550 | 13q21.33 | 338862 | ENSG00000281778 |
| HGNC:43691 | LINC00551 | 13q33.3 | 283483 | ENSG00000272274 |
| HGNC:43692 | LINC00552 | 13q34 | 100130386 | ENSG00000279770 |
| HGNC:43697 | LINC00554 | 13q32.3 | 100861542 | ENSG00000260738 |
| HGNC:43699 | LINC00555 | 13q33.1 | 100861543 | ENSG00000261057 |
| HGNC:43700 | LINC00556 | 13q12.11 | 100861551 | ENSG00000260131 |
| HGNC:43701 | LINC00557 | 13q32.1 | 100861544 | ENSG00000260962 |
| HGNC:43702 | LINC00558 | 13q14.3 | 100861552 | ENSG00000261517 |
| HGNC:43703 | LINC00559 | 13q31.3 | 100874187 | ENSG00000261446 |
| HGNC:43704 | LINC00560 | 13q31.2 | 100861553 | ENSG00000261666 |
| HGNC:43705 | LINC00561 | 13q22.2 | 100861545 | ENSG00000261206 |
| HGNC:43706 | LINC00562 | 13q14.2 | 100861549 | ENSG00000260388 |
| HGNC:43707 | LINC00563 | 13q14.13 | 100861554 | ENSG00000261097 |
| HGNC:43708 | LINC00564 | 13q31.1 | 100861546 | ENSG00000260094 |
| HGNC:43709 | LINC00565 | 13q34 | 100861555 | ENSG00000260910 |
| HGNC:43710 | LINC00566 | 13q12.12 | 100861547 | ENSG00000261498 |
| HGNC:43711 | LINC00567 | 13q34 | 283486 | ENSG00000259831 |
| HGNC:43717 | LINC00570 | 2p25.1 | 100874055 | ENSG00000224177 |
| HGNC:43721 | LINC00571 | 13q13.3 | 100874188 | ENSG00000223685 |
| HGNC:43722 | LINC00572 | 13q12.3 | 100861573 | ENSG00000224405 |
| HGNC:21598 | LINC00574 | 6q27 | 80069 | ENSG00000231690 |
| HGNC:21342 | LINC00575 | 4q21.22 | 439934 | ENSG00000231782 |
| HGNC:43807 | LINC00578 | 3q26.32 | 100505566 | ENSG00000228221 |
| HGNC:43840 | LINC00581 | 6p22.3 | 100874531 | ENSG00000280989 |
| HGNC:43842 | LINC00582 | 1q42.2 | 100287814 | ENSG00000229228 |
| HGNC:31437 | LINC00583 | 9p23 | 100113404 | ENSG00000205636 |
| HGNC:31372 | LINC00587 | 9q31.1 | 414319 | ENSG00000204250 |
| HGNC:24494 | LINC00588 | 8q12.1 | 26138 | ENSG00000215117 |
| HGNC:32299 | LINC00589 | 8p12 | 619351 | ENSG00000251191 |
| HGNC:27474 | LINC00592 | 12q13.13 | 283404 | ENSG00000258279 |
| HGNC:32382 | LINC00593 | 15q23 | 414926 | ENSG00000259703 |
| HGNC:31430 | LINC00595 | 10q22.3 | 414243 | ENSG00000230417 |
| HGNC:23167 | LINC00596 | 14q11.2 | 102724845 | ENSG00000259334 |
| HGNC:1193 | LINC00597 | 15q23-q24 | 81698 |  |
| HGNC:42770 | LINC00598 | 13q14.11 | 646982 | ENSG00000215483 |
| HGNC:27231 | LINC00599 | 8p23.1 | 157627 | ENSG00000253230 |
| HGNC:43916 | LINC00601 | 10q26.2 | 101101772 | ENSG00000235180 |
| HGNC:43917 | LINC00602 | 6q27 | 441177 | ENSG00000281832 |
| HGNC:43918 | LINC00603 | 5p13.1 | 102467077 | ENSG00000250048 |
| HGNC:43924 | LINC00604 | 5p13.1 | 106144578 | ENSG00000250585 |
| HGNC:43928 | LINC00605 | 14q32.32 | 100131366 | ENSG00000251533 |
| HGNC:43931 | LINC00606 | 3p25.3 | 285370 | ENSG00000226567 |
| HGNC:43944 | LINC00607 | 2q35 | 646324 | ENSG00000235770 |
| HGNC:27179 | LINC00608 | 2q35 | 151300 | ENSG00000236445 |
| HGNC:43960 | LINC00609 | 14q13.2-q13.3 | 101101773 | ENSG00000257585 |
| HGNC:28621 | LINC00612 | 12p13.31 | 253128 | ENSG00000214851 |
| HGNC:44060 | LINC00613 | 4q28.3 | 100507528 | ENSG00000248330 |
| HGNC:30165 | LINC00614 | 10p12.1 | 645587 | ENSG00000236983 |
| HGNC:26343 | LINC00615 | 12q21.33 | 439916 | ENSG00000196243 |
| HGNC:44065 | LINC00616 | 4q28.3 | 641365 | ENSG00000248307 |
| HGNC:20110 | LINC00618 | 14q32.2 | 145249 | ENSG00000225163 |
| HGNC:31657 | LINC00619 | 10q11.21 | 414260 | ENSG00000204187 |
| HGNC:44223 | LINC00620 | 3p25.1 | 285375 | ENSG00000224514 |
| HGNC:44227 | LINC00621 | 13q12.12 | 100996930 | ENSG00000262619 |
| HGNC:44251 | LINC00622 | 1p12 | 644242 | ENSG00000260941 |
| HGNC:44252 | LINC00623 | 1p11.2 | 728855 | ENSG00000226067 |
| HGNC:44254 | LINC00624 | 1q21.1-q21.2 | 100289211 | ENSG00000278811 |
| HGNC:44257 | LINC00626 | 1q24.2 | 79100 | ENSG00000225826 |
| HGNC:27008 | LINC00628 | 1q32.1 | 127841 | ENSG00000280924 |
| HGNC:44262 | LINC00629 | Xq26.3 | 100506757 | ENSG00000227060 |
| HGNC:44263 | LINC00630 | Xq22.1 | 100287765 | ENSG00000223546 |
| HGNC:27865 | LINC00632 | Xq27.1 | 286411 | ENSG00000203930 |
| HGNC:27930 | LINC00634 | 22q13.2 | 339674 | ENSG00000205704 |
| HGNC:27184 | LINC00635 | 3q13.12 | 151658 | ENSG00000241469 |
| HGNC:27702 | LINC00636 | 3q13.12 | 285205 | ENSG00000240423 |
| HGNC:27069 | LINC00637 | 14q32.33 | 145216 | ENSG00000258735 |
| HGNC:28325 | LINC00638 | 14q32.33 | 196872 | ENSG00000258701 |
| HGNC:27502 | LINC00639 | 14q21.1 | 283547 | ENSG00000259070 |
| HGNC:44291 | LINC00640 | 14q22.1 | 283553 | ENSG00000258479 |
| HGNC:27511 | LINC00641 | 14q11.2 | 283624 | ENSG00000258441 |
| HGNC:44293 | LINC00642 | 14q32.11 | 400238 | ENSG00000233208 |
| HGNC:44296 | LINC00643 | 14q23.2 | 646113 | ENSG00000186369 |
| HGNC:44297 | LINC00644 | 14q23.2 | 101954204 | ENSG00000259142 |
| HGNC:44299 | LINC00645 | 14q12 | 100505967 | ENSG00000258548 |
| HGNC:44302 | LINC00648 | 14q21.3 | 100506433 | ENSG00000259129 |
| HGNC:44305 | LINC00649 | 21q22.11 | 100506334 | ENSG00000237945 |
| HGNC:25003 | LINC00652 | 20p11.23 | 29075 | ENSG00000179935 |
| HGNC:44308 | LINC00653 | 20p11.23 | 100270804 | ENSG00000273148 |
| HGNC:27154 | LINC00654 | 20p12.3 | 149837 | ENSG00000205181 |
| HGNC:27304 | LINC00656 | 20p11.21 | 200261 | ENSG00000233746 |
| HGNC:44315 | LINC00658 | 20p12.3 | 100507629 | ENSG00000226995 |
| HGNC:44316 | LINC00659 | 20q13.33 | 100652730 | ENSG00000228705 |
| HGNC:27002 | LINC00661 | 19p13.12 | 126536 | ENSG00000205396 |
| HGNC:27122 | LINC00662 | 19q11 | 148189 | ENSG00000261824 |
| HGNC:28609 | LINC00663 | 19p13.11 | 284440 | ENSG00000266904 |
| HGNC:44319 | LINC00664 | 19p12 | 400680 | ENSG00000268658 |
| HGNC:44323 | LINC00665 | 19q13.12 | 100506930 | ENSG00000232677 |
| HGNC:27906 | LINC00667 | 18p11.31 | 339290 | ENSG00000263753 |
| HGNC:44328 | LINC00668 | 18p11.31 | 400643 | ENSG00000265933 |
| HGNC:44338 | LINC00670 | 17p12 | 284034 | ENSG00000179136 |
| HGNC:44339 | LINC00671 | 17q21.31 | 388387 | ENSG00000213373 |
| HGNC:44353 | LINC00672 | 17q12 | 100505576 | ENSG00000263874 |
| HGNC:44354 | LINC00673 | 17q24.3 | 100499467 |  |
| HGNC:44355 | LINC00674 | 17q24.2 | 100499466 | ENSG00000237854 |
| HGNC:44394 | LINC00676 | 13q34 | 101409253 | ENSG00000234854 |
| HGNC:20121 | LINC00677 | 14q32.32 | 105370683 | ENSG00000259717 |
| HGNC:44413 | LINC00678 | 11p14.1 | 101410541 | ENSG00000254934 |
| HGNC:44417 | LINC00680 | 6p11.2 | 106660612 | ENSG00000215190 |
| HGNC:44423 | LINC00681 | 8p23.1 | 101409254 | ENSG00000255494 |
| HGNC:44466 | LINC00682 | 4p13 | 101927074 | ENSG00000245870 |
| HGNC:44467 | LINC00683 | 18q23 | 400660 | ENSG00000266256 |
| HGNC:27560 | LINC00685 | Xp22.33 and Yp11.32 | 283981 | ENSG00000226179 |
| HGNC:16221 | LINC00686 | 20q13.33 | 140865 | ENSG00000237687 |
| HGNC:16194 | LINC00687 | 20p12.2 | 728450 | ENSG00000228422 |
| HGNC:27217 | LINC00689 | 7q36.3 | 154822 | ENSG00000231419 |
| HGNC:44503 | LINC00690 | 3p24.3 | 100996597 | ENSG00000233570 |
| HGNC:44514 | LINC00691 | 3p24.2 | 152024 | ENSG00000224074 |
| HGNC:27708 | LINC00692 | 3p24.2 | 285326 | ENSG00000230891 |
| HGNC:44526 | LINC00693 | 3p24.1 | 645206 |  |
| HGNC:34426 | LINC00696 | 3p21.1 | 100128378 |  |
| HGNC:27720 | LINC00698 | 3p14.2 | 285401 | ENSG00000244342 |
| HGNC:27422 | LINC00700 | 10p15.3 | 282980 | ENSG00000234962 |
| HGNC:44674 | LINC00701 | 10p15.3 | 399708 | ENSG00000234556 |
| HGNC:44676 | LINC00702 | 10p15.1 | 100652988 | ENSG00000233117 |
| HGNC:44677 | LINC00703 | 10p15.1 | 100507059 | ENSG00000224382 |
| HGNC:27874 | LINC00705 | 10p15.1 | 338588 | ENSG00000225269 |
| HGNC:44690 | LINC00706 | 10p14 | 100652997 | ENSG00000281186 |
| HGNC:44691 | LINC00707 | 10p14 | 100507127 | ENSG00000238266 |
| HGNC:44694 | LINC00708 | 10p14 | 100507143 | ENSG00000232170 |
| HGNC:44700 | LINC00709 | 10p14 | 100507163 | ENSG00000230014 |
| HGNC:27386 | LINC00710 | 10p14 | 254312 | ENSG00000229240 |
| HGNC:50281 | LINC00824 | 8q24.21 | 101927774 | ENSG00000254275 |
| HGNC:44915 | LINC00836 | 10p12.1 | 101929052 | ENSG00000280809 |
| HGNC:27436 | LINC00837 | 10p12.1 | 100507605 | ENSG00000235824 |
| HGNC:44963 | LINC00838 | 10p11.22 | 100505583 | ENSG00000261683 |
| HGNC:28269 | LINC00839 | 10q11.21 | 84856 | ENSG00000185904 |
| HGNC:44987 | LINC00840 | 10q11.21 | 100506835 | ENSG00000226808 |
| HGNC:27430 | LINC00841 | 10q11.21 | 283033 | ENSG00000233395 |
| HGNC:44989 | LINC00842 | 10q11.22 | 643650 | ENSG00000285294 |
| HGNC:45009 | LINC00843 | 10q11.23 | 102902672 | ENSG00000178440 |
| HGNC:45031 | LINC00844 | 10q21.1 | 100507008 | ENSG00000237949 |
| HGNC:45033 | LINC00845 | 10q21.2 | 100507058 | ENSG00000227244 |
| HGNC:45050 | LINC00847 | 5q35.3 | 729678 | ENSG00000245060 |
| HGNC:45092 | LINC00850 | Xq28 | 101241891 | ENSG00000280752 |
| HGNC:43424 | LINC00851 | 20p11.23 | 440757 | ENSG00000237282 |
| HGNC:29904 | LINC00852 | 3p25.3 | 84657 | ENSG00000231177 |
| HGNC:43716 | LINC00853 | 1p33 | 100874253 | ENSG00000224805 |
| HGNC:45111 | LINC00856 | 10q22.3 | 100132987 | ENSG00000230417 |
| HGNC:45114 | LINC00857 | 10q22.3 | 439990 | ENSG00000237523 |
| HGNC:27276 | LINC00858 | 10q23.1 | 170425 | ENSG00000229404 |
| HGNC:45133 | LINC00861 | 8q24.13 | 100130231 | ENSG00000245164 |
| HGNC:21901 | LINC00862 | 1q32.1 | 554279 | ENSG00000203721 |
| HGNC:45162 | LINC00863 | 10q23.2 | 439994 | ENSG00000224914 |
| HGNC:45170 | LINC00865 | 10q23.31 | 643529 | ENSG00000232229 |
| HGNC:45232 | LINC00866 | 10q24.2 | 100505561 | ENSG00000227356 |
| HGNC:45265 | LINC00867 | 10q26.11 | 100506126 | ENSG00000232139 |
| HGNC:27562 | LINC00868 | 17q25.2 | 283994 | ENSG00000267535 |
| HGNC:29050 | LINC00869 | 1q21.2 | 57234 | ENSG00000277147 |
| HGNC:27319 | LINC00870 | 3p13 | 201617 | ENSG00000243083 |
| HGNC:47038 | LINC00871 | 14q21.2 | 100506412 | ENSG00000258700 |
| HGNC:27706 | LINC00877 | 3p13 | 285286 | ENSG00000241163 |
| HGNC:48566 | LINC00879 | 3q11.2 | 255025 | ENSG00000239589 |
| HGNC:27948 | LINC00880 | 3q25.31 | 339894 | ENSG00000243629 |
| HGNC:48567 | LINC00881 | 3q25.31 | 100498859 | ENSG00000241135 |
| HGNC:48568 | LINC00882 | 3q13.12 | 100302640 | ENSG00000242759 |
| HGNC:48570 | LINC00884 | 3q29 | 401106 | ENSG00000233058 |
| HGNC:48571 | LINC00885 | 3q29 | 401109 | ENSG00000224652 |
| HGNC:48572 | LINC00886 | 3q25.31 | 730091 | ENSG00000240875 |
| HGNC:48574 | LINC00887 | 3q29 | 100131551 | ENSG00000214145 |
| HGNC:48575 | LINC00888 | 3q27.1 | 100505687 | ENSG00000240024 |
| HGNC:26410 | LINC00889 | Xq26.3 | 158696 |  |
| HGNC:48577 | LINC00891 | Xq13.1 | 441501 | ENSG00000281852 |
| HGNC:48578 | LINC00892 | Xq26.3 | 100128420 | ENSG00000233093 |
| HGNC:44265 | LINC00893 | Xq28 | 100131434 | ENSG00000241769 |
| HGNC:48579 | LINC00894 | Xq28 | 100272228 | ENSG00000235703 |
| HGNC:48580 | LINC00895 | 22q11.21 | 150185 | ENSG00000281548 |
| HGNC:26519 | LINC00896 | 22q11.21 | 150197 | ENSG00000236499 |
| HGNC:48581 | LINC00898 | 22q13.31 | 400932 | ENSG00000205634 |
| HGNC:48583 | LINC00899 | 22q13.31 | 100271722 | ENSG00000231711 |
| HGNC:27444 | LINC00900 | 11q23.3 | 283143 | ENSG00000246100 |
| HGNC:40352 | LINC00901 | 3q13.31 | 100506724 | ENSG00000242385 |
| HGNC:40351 | LINC00903 | 3q13.31 | 100861506 | ENSG00000241397 |
| HGNC:44325 | LINC00904 | 19q13.11 | 100652909 | ENSG00000271649 |
| HGNC:26334 | LINC00905 | 19p13.12 | 148231 | ENSG00000167459 |
| HGNC:27121 | LINC00906 | 19q12 | 148145 | ENSG00000267339 |
| HGNC:44327 | LINC00907 | 18q12.3 | 284260 | ENSG00000267586 |
| HGNC:27599 | LINC00908 | 18q23 | 284276 | ENSG00000263812 |
| HGNC:44331 | LINC00909 | 18q22.3 | 400657 | ENSG00000264247 |
| HGNC:44361 | LINC00910 | 17q21.31 | 100130581 | ENSG00000188825 |
| HGNC:48596 | LINC00911 | 14q31.3 | 100996280 | ENSG00000259107 |
| HGNC:48607 | LINC00917 | 16q24.1 | 732275 | ENSG00000168367 |
| HGNC:48610 | LINC00919 | 16q12.1 | 100505619 | ENSG00000260268 |
| HGNC:48611 | LINC00920 | 16q21 | 100505865 | ENSG00000246898 |
| HGNC:26830 | LINC00921 | 16p13.3 | 283876 | ENSG00000281005 |
| HGNC:27545 | LINC00922 | 16q21 | 283867 | ENSG00000261742 |
| HGNC:28088 | LINC00923 | 15q26.2 | 91948 | ENSG00000251209 |
| HGNC:27081 | LINC00924 | 15q26.2 | 145820 | ENSG00000259134 |
| HGNC:27514 | LINC00926 | 15q21.3 | 283663 | ENSG00000247982 |
| HGNC:27522 | LINC00927 | 15q25.1 | 283688 | ENSG00000259361 |
| HGNC:27535 | LINC00928 | 15q26.1 | 283761 | ENSG00000259218 |
| HGNC:48615 | LINC00929 | 15q12 | 503519 | ENSG00000259150 |
| HGNC:48620 | LINC00930 | 15q26.1 | 100144604 | ENSG00000258647 |
| HGNC:48625 | LINC00933 | 15q25.2 | 100506874 | ENSG00000259728 |
| HGNC:27059 | LINC00934 | 12q24.23 | 144742 | ENSG00000281196 |
| HGNC:48629 | LINC00937 | 12p13.31 | 389634 | ENSG00000226091 |
| HGNC:48630 | LINC00938 | 12q12 | 400027 |  |
| HGNC:48631 | LINC00939 | 12q24.32 | 400084 | ENSG00000249267 |
| HGNC:48634 | LINC00940 | 12p13.33 | 100271702 | ENSG00000235049 |
| HGNC:48635 | LINC00941 | 12p11.21 | 100287314 | ENSG00000235884 |
| HGNC:48636 | LINC00942 | 12p13.33 | 100292680 | ENSG00000249628 |
| HGNC:48639 | LINC00943 | 12q24.32 | 100507206 | ENSG00000189238 |
| HGNC:48640 | LINC00944 | 12q24.32 | 387895 | ENSG00000256128 |
| HGNC:48643 | LINC00945 | 21q22.11 | 101930746 | ENSG00000232539 |
| HGNC:28098 | LINC00950 | 9p13.3 | 92973 |  |
| HGNC:48662 | LINC00951 | 6p21.2 | 401260 | ENSG00000204092 |
| HGNC:48668 | LINC00954 | 2p24.1 | 400946 | ENSG00000228784 |
| HGNC:26644 | LINC00955 | 4p16.3 | 285492 | ENSG00000216560 |
| HGNC:22332 | LINC00957 | 7p13 | 255031 | ENSG00000235314 |
| HGNC:48671 | LINC00958 | 11p15.3 | 100506305 | ENSG00000251381 |
| HGNC:48710 | LINC00960 | 3p12.3 | 401074 | ENSG00000242516 |
| HGNC:48716 | LINC00963 | 9q34.11 | 100506190 | ENSG00000204054 |
| HGNC:27226 | LINC00964 | 8q24.13 | 157381 | ENSG00000249816 |
| HGNC:28022 | LINC00965 | 8p23.1 | 349196 |  |
| HGNC:48725 | LINC00967 | 8q13.1 | 100505659 | ENSG00000253138 |
| HGNC:48727 | LINC00968 | 8q12.1 | 100507632 | ENSG00000246430 |
| HGNC:48730 | LINC00970 | 1q24.2 | 101978719 | ENSG00000203601 |
| HGNC:48737 | LINC00971 | 3p12.1 | 440970 | ENSG00000242641 |
| HGNC:48826 | LINC00972 | 7q21.11 | 105375380 | ENSG00000225128 |
| HGNC:48868 | LINC00973 | 3q12.1 | 100506377 | ENSG00000240476 |
| HGNC:27105 | LINC00974 | 17q21.2 | 147093 | ENSG00000226629 |
| HGNC:50610 | LINC00976 | 8q24.21 | 106144608 |  |
| HGNC:48902 | LINC00977 | 8q24.21 | 728724 | ENSG00000250400 |
| HGNC:48664 | LINC00982 | 1p36.32 | 440556 | ENSG00000177133 |
| HGNC:48911 | LINC00987 | 12p13.31 | 100499405 | ENSG00000237248 |
| HGNC:48918 | LINC00989 | 4q21.21 | 100506035 | ENSG00000250334 |
| HGNC:48943 | LINC00992 | 5q23.1 | 728342 | ENSG00000248663 |
| HGNC:48948 | LINC00993 | 10p11.21 | 101929520 | ENSG00000235687 |
| HGNC:48949 | LINC00994 | 3p14.1 | 100287879 | ENSG00000189196 |
| HGNC:27800 | LINC00996 | 7q36.1 | 285972 | ENSG00000242258 |
| HGNC:48952 | LINC00997 | 7p14.3 | 401321 | ENSG00000281332 |
| HGNC:38537 | LINC00999 | 10p11.1 | 399744 |  |
| HGNC:38541 | LINC01000 | 7q32.1 | 402483 |  |
| HGNC:38540 | LINC01001 | 11p15.5 | 100133161 | ENSG00000230724 |
| HGNC:38538 | LINC01002 | 19p13.3 | 399844 | ENSG00000282508 |
| HGNC:48957 | LINC01003 | 7q36.1 | 100128822 | ENSG00000261455 |
| HGNC:48961 | LINC01004 | 7q22.3 | 100216546 | ENSG00000228393 |
| HGNC:48963 | LINC01005 | 7q11.21 | 100506050 | ENSG00000228564 |
| HGNC:48971 | LINC01006 | 7q36.3 | 100506380 | ENSG00000182648 |
| HGNC:48973 | LINC01007 | 7q22.1 | 100506527 | ENSG00000233123 |
| HGNC:48978 | LINC01010 | 6q23.2 | 154092 | ENSG00000236700 |
| HGNC:33812 | LINC01011 | 6p25.2 | 401232 | ENSG00000244041 |
| HGNC:48986 | LINC01012 | 6p22.1 | 100507173 |  |
| HGNC:48987 | LINC01013 | 6q23.2 | 100507254 | ENSG00000228495 |
| HGNC:41353 | LINC01014 | 3q26.32 | 100874330 | ENSG00000223941 |
| HGNC:48988 | LINC01015 | 6p22.1 | 100507362 | ENSG00000224582 |
| HGNC:48991 | LINC01016 | 6p21.31 | 100507584 | ENSG00000249346 |
| HGNC:50641 | LINC01017 | 5p15.33 | 102467075 | ENSG00000250716 |
| HGNC:27394 | LINC01018 | 5p15.31 | 255167 | ENSG00000250056 |
| HGNC:27742 | LINC01019 | 5p15.33 | 285577 | ENSG00000248118 |
| HGNC:27968 | LINC01020 | 5p15.32 | 340094 | ENSG00000215231 |
| HGNC:48998 | LINC01022 | 7q36.3 | 105375616 | ENSG00000232715 |
| HGNC:49004 | LINC01023 | 5q21.3 | 100652853 | ENSG00000272523 |
| HGNC:49014 | LINC01028 | 17q24.3 | 101928141 | ENSG00000267603 |
| HGNC:49015 | LINC01029 | 18q23 | 101927715 | ENSG00000265843 |
| HGNC:49016 | LINC01030 | 8q21.3 | 101937451 | ENSG00000253799 |
| HGNC:49017 | LINC01031 | 1q31.2 | 101929184 | ENSG00000232077 |
| HGNC:49018 | LINC01032 | 1q31.2 | 102724954 | ENSG00000234871 |
| HGNC:49019 | LINC01033 | 5q11.2 | 104355136 | ENSG00000249069 |
| HGNC:49021 | LINC01034 | 13q22.2 | 106144601 | ENSG00000224933 |
| HGNC:49022 | LINC01035 | 1q31.1 | 106144592 | ENSG00000226486 |
| HGNC:49024 | LINC01036 | 1q31.1 | 104169671 | ENSG00000236030 |
| HGNC:49025 | LINC01037 | 1q31.1 | 106144535 | ENSG00000231599 |
| HGNC:49026 | LINC01038 | 13q31.1 | 102724076 | ENSG00000229011 |
| HGNC:49027 | LINC01039 | 13q32.3 | 104355149 | ENSG00000234168 |
| HGNC:49028 | LINC01040 | 13q31.3 | 105370308 | ENSG00000226037 |
| HGNC:49031 | LINC01043 | 13q34 | 101928752 | ENSG00000260343 |
| HGNC:49032 | LINC01044 | 13q34 | 104266956 | ENSG00000223626 |
| HGNC:49040 | LINC01046 | 13q12.11 | 103689843 | ENSG00000233405 |
| HGNC:49041 | LINC01047 | 13q31.2 | 105616982 | ENSG00000232225 |
| HGNC:49042 | LINC01048 | 13q13.3 | 103695431 | ENSG00000230390 |
| HGNC:49043 | LINC01049 | 13q31.3 | 101927224 | ENSG00000234384 |
| HGNC:49044 | LINC01050 | 13q14.11 | 103689845 | ENSG00000271216 |
| HGNC:49046 | LINC01052 | 13q21.32 | 105370242 | ENSG00000234767 |
| HGNC:49047 | LINC01053 | 13q12.13 | 102723318 | ENSG00000238169 |
| HGNC:49048 | LINC01054 | 13q34 | 104355150 | ENSG00000229723 |
| HGNC:49049 | LINC01055 | 13q14.13 | 103752581 | ENSG00000235366 |
| HGNC:49050 | LINC01056 | 20q13.33 | 100144597 | ENSG00000237119 |
| HGNC:49061 | LINC01058 | 13q12.3 | 103724387 | ENSG00000225039 |
| HGNC:49081 | LINC01060 | 4q35.2 | 401164 | ENSG00000249378 |
| HGNC:49084 | LINC01061 | 4q26 | 401149 |  |
| HGNC:49092 | LINC01063 | 3q29 | 101929769 | ENSG00000232065 |
| HGNC:49103 | LINC01065 | 13q14.3 | 102723875 | ENSG00000237092 |
| HGNC:49104 | LINC01066 | 13q12.3 | 106144544 | ENSG00000230403 |
| HGNC:49105 | LINC01067 | 13q33.3 | 107080624 | ENSG00000236053 |
| HGNC:49106 | LINC01068 | 13q31.1 | 103724388 | ENSG00000227676 |
| HGNC:49109 | LINC01069 | 13q22.3 | 101927176 | ENSG00000236133 |
| HGNC:49110 | LINC01070 | 13q34 | 101928698 | ENSG00000260102 |
| HGNC:49112 | LINC01072 | 13q12.11 | 104355137 | ENSG00000236076 |
| HGNC:49114 | LINC01073 | 13q13.1 | 107080623 | ENSG00000235822 |
| HGNC:49117 | LINC01074 | 13q21.31 | 106144607 | ENSG00000227611 |
| HGNC:49118 | LINC01075 | 13q21.31 | 103752583 | ENSG00000230142 |
| HGNC:49119 | LINC01076 | 13q12.13 | 106144602 | ENSG00000225105 |
| HGNC:49120 | LINC01077 | 13q14.2 | 107080621 | ENSG00000233456 |
| HGNC:49121 | LINC01078 | 13q22.2 | 106144536 | ENSG00000223880 |
| HGNC:49122 | LINC01079 | 13q12.2 | 106146146 | ENSG00000229609 |
| HGNC:49123 | LINC01080 | 13q31.1 | 101515984 | ENSG00000281721 |
| HGNC:49124 | LINC01081 | 16q24.1 | 101154687 | ENSG00000268754 |
| HGNC:49125 | LINC01082 | 16q24.1 | 100506542 | ENSG00000269186 |
| HGNC:27198 | LINC01085 | 4p15.33 | 152742 | ENSG00000248698 |
| HGNC:49144 | LINC01087 | 2q21.1 | 101927994 | ENSG00000224559 |
| HGNC:49148 | LINC01088 | 4q21.21 | 100505875 | ENSG00000249307 |
| HGNC:27886 | LINC01089 | 12q24.31 | 338799 | ENSG00000212694 |
| HGNC:49201 | LINC01090 | 2q32.1 | 104355152 | ENSG00000231689 |
| HGNC:27721 | LINC01091 | 4q28.1 | 285419 | ENSG00000249464 |
| HGNC:49218 | LINC01093 | 4q35.1 | 100506229 | ENSG00000249173 |
| HGNC:49219 | LINC01094 | 4q21.21 | 100505702 | ENSG00000251442 |
| HGNC:49220 | LINC01095 | 4q31.22 | 100505545 | ENSG00000248809 |
| HGNC:27739 | LINC01096 | 4p15.33 | 285548 | ENSG00000246095 |
| HGNC:27738 | LINC01097 | 4p15.33 | 285547 | ENSG00000281202 |
| HGNC:27731 | LINC01098 | 4q34.3 | 285501 | ENSG00000231171 |
| HGNC:49222 | LINC01099 | 4q34.3 | 101928656 | ENSG00000251504 |
| HGNC:49224 | LINC01100 | 3q25.33 | 730109 | ENSG00000242107 |
| HGNC:25923 | LINC01101 | 2q14.2 | 84931 | ENSG00000280409 |
| HGNC:27165 | LINC01102 | 2q12.1 | 150568 | ENSG00000235597 |
| HGNC:49225 | LINC01103 | 2q12.1 | 101927360 | ENSG00000234781 |
| HGNC:49226 | LINC01104 | 2q11.2 | 150577 | ENSG00000232084 |
| HGNC:26769 | LINC01106 | 2q13 | 151009 | ENSG00000175772 |
| HGNC:49229 | LINC01107 | 2q37.3 | 151171 | ENSG00000225493 |
| HGNC:49234 | LINC01108 | 6p23 | 102216342 | ENSG00000226673 |
| HGNC:49235 | LINC01109 | 8q21.11 | 102216341 | ENSG00000271167 |
| HGNC:49237 | LINC01111 | 8q21.13 | 101926978 | ENSG00000254300 |
| HGNC:49245 | LINC01114 | 2q12.1 | 284998 | ENSG00000234177 |
| HGNC:49258 | LINC01115 | 2p25.3 | 339822 | ENSG00000237667 |
| HGNC:49259 | LINC01116 | 2q31.1 | 375295 | ENSG00000163364 |
| HGNC:49260 | LINC01117 | 2q31.1 | 102724224 | ENSG00000224577 |
| HGNC:49261 | LINC01118 | 2p21 | 388948 | ENSG00000222005 |
| HGNC:49262 | LINC01119 | 2p21 | 100134259 | ENSG00000239332 |
| HGNC:49265 | LINC01120 | 2q21.1 | 389043 | ENSG00000223631 |
| HGNC:49266 | LINC01121 | 2p21 | 400952 | ENSG00000205054 |
| HGNC:49267 | LINC01122 | 2p16.1 | 400955 | ENSG00000233723 |
| HGNC:49269 | LINC01123 | 2q13 | 440894 | ENSG00000204588 |
| HGNC:49270 | LINC01124 | 2q31.1 | 440925 | ENSG00000222033 |
| HGNC:49275 | LINC01126 | 2p21 | 100129726 | ENSG00000279873 |
| HGNC:49292 | LINC01127 | 2q11.2 | 100506328 | ENSG00000281162 |
| HGNC:49377 | LINC01128 | 1p36.33 | 643837 | ENSG00000228794 |
| HGNC:49444 | LINC01132 | 1q42.3 | 100506810 | ENSG00000227630 |
| HGNC:49447 | LINC01133 | 1q23.2 | 100505633 | ENSG00000224259 |
| HGNC:49449 | LINC01134 | 1p36.32 | 100133612 | ENSG00000236423 |
| HGNC:49450 | LINC01135 | 1p32.1 | 100131060 | ENSG00000234807 |
| HGNC:49452 | LINC01136 | 1q32.1 | 730227 | ENSG00000233791 |
| HGNC:49453 | LINC01137 | 1p34.3 | 728431 | ENSG00000233621 |
| HGNC:49454 | LINC01138 | 1q21.2 | 388685 | ENSG00000274020 |
| HGNC:27924 | LINC01139 | 1q43 | 339535 | ENSG00000215808 |
| HGNC:27922 | LINC01140 | 1p22.3 | 339524 | ENSG00000267272 |
| HGNC:49455 | LINC01141 | 1p36.12 | 339505 | ENSG00000236963 |
| HGNC:49456 | LINC01142 | 1q24.2 | 284688 | ENSG00000224286 |
| HGNC:49458 | LINC01143 | 2p13.3 | 104355141 | ENSG00000237751 |
| HGNC:49460 | LINC01144 | 1p34.1 | 400752 | ENSG00000281912 |
| HGNC:49462 | LINC01145 | 1q21.1 | 103091866 | ENSG00000272419 |
| HGNC:49467 | LINC01146 | 14q31.3 | 283587 | ENSG00000258867 |
| HGNC:49468 | LINC01147 | 14q31.3 | 101928791 | ENSG00000258826 |
| HGNC:27507 | LINC01148 | 14q31.3 | 283585 | ENSG00000258804 |
| HGNC:39757 | LINC01149 | 6p21.33 | 101929111 | ENSG00000230174 |
| HGNC:49469 | LINC01150 | 11p15.5 | 101927624 | ENSG00000229671 |
| HGNC:49471 | LINC01151 | 8q24.13 | 104266958 | ENSG00000253819 |
| HGNC:16752 | LINC01152 | 17q24.3 | 102606463 | ENSG00000256124 |
| HGNC:49495 | LINC01153 | 10q26.12 | 101927889 | ENSG00000227143 |
| HGNC:49504 | LINC01154 | 12q13.13 | 106144575 | ENSG00000257477 |
| HGNC:49512 | LINC01157 | 5q13.3 | 105379037 |  |
| HGNC:49514 | LINC01159 | 2q12.1 | 102682016 | ENSG00000229743 |
| HGNC:49525 | LINC01160 | 1p13.2 | 100129269 | ENSG00000231346 |
| HGNC:49528 | LINC01162 | 7p15.3 | 104355138 | ENSG00000232790 |
| HGNC:49530 | LINC01163 | 10q26.2 | 101927381 | ENSG00000280953 |
| HGNC:49533 | LINC01164 | 10q26.3 | 399827 | ENSG00000189275 |
| HGNC:49534 | LINC01165 | 10q26.3 | 100128830 | ENSG00000229081 |
| HGNC:49535 | LINC01166 | 10q26.3 | 101927590 | ENSG00000232903 |
| HGNC:49536 | LINC01167 | 10q26.3 | 103695432 | ENSG00000224758 |
| HGNC:49537 | LINC01168 | 10q26.3 | 399829 | ENSG00000240707 |
| HGNC:49541 | LINC01169 | 15q22.31 | 102723165 | ENSG00000259471 |
| HGNC:49542 | LINC01170 | 5q23.2 | 103724389 | ENSG00000253807 |
| HGNC:49545 | LINC01173 | 2q37.1-q37.2 | 106144537 | ENSG00000280744 |
| HGNC:49548 | LINC01176 | 7p14.3 | 100506516 | ENSG00000281404 |
| HGNC:49549 | LINC01177 | 16p13.2 | 104355218 | ENSG00000261397 |
| HGNC:49556 | LINC01179 | 4q32.3 | 101928151 | ENSG00000249500 |
| HGNC:49558 | LINC01180 | 17q21.31 | 101927017 | ENSG00000266979 |
| HGNC:25533 | LINC01181 | 8q22.3 | 379034 | ENSG00000250929 |
| HGNC:49564 | LINC01182 | 4p15.33 | 101929071 | ENSG00000250634 |
| HGNC:49565 | LINC01184 | 5q23.3 | 644873 | ENSG00000245937 |
| HGNC:49572 | LINC01185 | 2p16.1 | 400957 | ENSG00000228414 |
| HGNC:49573 | LINC01186 | Xp11.3 | 101927574 | ENSG00000236751 |
| HGNC:49575 | LINC01187 | 5q35.1 | 100507267 | ENSG00000249601 |
| HGNC:49592 | LINC01189 | 9q13 | 643648 | ENSG00000232827 |
| HGNC:49595 | LINC01191 | 2q14.1 | 440900 | ENSG00000234199 |
| HGNC:37197 | LINC01192 | 3q26.1 | 647107 | ENSG00000241369 |
| HGNC:28003 | LINC01193 | 15q11.2 | 348120 | ENSG00000258710 |
| HGNC:37171 | LINC01194 | 5p15.2 | 404663 | ENSG00000248131 |
| HGNC:49550 | LINC01195 | 16p13.2 | 104266959 | ENSG00000261075 |
| HGNC:49597 | LINC01197 | 15q26.2 | 400456 | ENSG00000248441 |
| HGNC:49598 | LINC01198 | 13q14.13 | 101929344 | ENSG00000231817 |
| HGNC:49632 | LINC01201 | Xq26.1 | 104266960 | ENSG00000228659 |
| HGNC:49633 | LINC01202 | 5q34 | 104326188 | ENSG00000280776 |
| HGNC:49634 | LINC01203 | Xp22.2 | 100133123 | ENSG00000226985 |
| HGNC:49635 | LINC01204 | Xp11.3 | 101927528 | ENSG00000229563 |
| HGNC:49636 | LINC01205 | 3q13.13 | 401082 | ENSG00000228980 |
| HGNC:49637 | LINC01206 | 3q26.33 | 100996490 | ENSG00000242512 |
| HGNC:49639 | LINC01208 | 3q26.32 | 100505547 | ENSG00000223715 |
| HGNC:49640 | LINC01209 | 3q26.32 | 101928684 | ENSG00000228308 |
| HGNC:49642 | LINC01210 | 3q22.3 | 100507274 | ENSG00000239513 |
| HGNC:49648 | LINC01213 | 3q25.1 | 101927992 | ENSG00000244541 |
| HGNC:49650 | LINC01214 | 3q25.1 | 101928022 | ENSG00000243550 |
| HGNC:49651 | LINC01215 | 3q13.12 | 101929623 | ENSG00000271856 |
| HGNC:41418 | LINC01216 | 4q24 | 100874275 | ENSG00000250223 |
| HGNC:41419 | LINC01217 | 4q24 | 100874276 | ENSG00000251219 |
| HGNC:41420 | LINC01218 | 4q24 | 107986233 | ENSG00000251636 |
| HGNC:49653 | LINC01219 | 11p15.5 | 104355220 | ENSG00000232987 |
| HGNC:49664 | LINC01220 | 14q24.3 | 731223 | ENSG00000259687 |
| HGNC:49671 | LINC01221 | 1q32.1 | 104266961 | ENSG00000235492 |
| HGNC:49672 | LINC01222 | 1q32.1 | 102800316 | ENSG00000233410 |
| HGNC:49676 | LINC01224 | 19p12 | 104472717 | ENSG00000269416 |
| HGNC:49678 | LINC01226 | 1p35.2 | 284551 | ENSG00000284543 |
| HGNC:49680 | LINC01227 | 16q23.2 | 101928276 | ENSG00000260737 |
| HGNC:49681 | LINC01228 | 16q23.2 | 104266962 | ENSG00000261082 |
| HGNC:49682 | LINC01229 | 16q23.2 | 101928248 | ENSG00000260876 |
| HGNC:49686 | LINC01230 | 9p24.3 | 102800446 | ENSG00000281769 |
| HGNC:49688 | LINC01231 | 9p24.2 | 101929247 | ENSG00000236511 |
| HGNC:49755 | LINC01232 | 13q32.3 | 102725509 | ENSG00000280734 |
| HGNC:49756 | LINC01233 | 19p12 | 100128139 | ENSG00000269364 |
| HGNC:49757 | LINC01234 | 12q24.13 | 100506465 | ENSG00000249550 |
| HGNC:49769 | LINC01235 | 9p23 | 401492 | ENSG00000270547 |
| HGNC:49793 | LINC01237 | 2q37.3 | 101927289 | ENSG00000233806 |
| HGNC:49795 | LINC01238 | 2q37.3 | 102723927 | ENSG00000237940 |
| HGNC:49796 | LINC01239 | 9p21.3 | 441389 | ENSG00000234840 |
| HGNC:49804 | LINC01241 | 9p21.2 | 101929582 | ENSG00000236306 |
| HGNC:49810 | LINC01242 | 9p21.1 | 401497 | ENSG00000280683 |
| HGNC:49814 | LINC01243 | 9p21.1 | 101929620 | ENSG00000260720 |
| HGNC:49840 | LINC01246 | 2p25.2 | 102800315 |  |
| HGNC:49841 | LINC01247 | 2p25.2 | 101929390 | ENSG00000227007 |
| HGNC:49842 | LINC01248 | 2p25.2 | 102723818 | ENSG00000224128 |
| HGNC:49843 | LINC01249 | 2p25.2 | 727982 | ENSG00000231532 |
| HGNC:49844 | LINC01250 | 2p25.3 | 101927554 | ENSG00000234423 |
| HGNC:49845 | LINC01251 | 9p13.3 | 101929688 | ENSG00000233776 |
| HGNC:27888 | LINC01252 | 12p13.2 | 338817 | ENSG00000247157 |
| HGNC:49870 | LINC01254 | 18p11.22 | 101927350 | ENSG00000260913 |
| HGNC:49871 | LINC01255 | 18p11.21 | 101927433 | ENSG00000267252 |
| HGNC:49895 | LINC01256 | 4q28.3 | 104355285 | ENSG00000251398 |
| HGNC:26972 | LINC01257 | 12q24.33 | 116437 | ENSG00000204603 |
| HGNC:49898 | LINC01258 | 4p14 | 101928776 | ENSG00000249534 |
| HGNC:49899 | LINC01259 | 4p14 | 106144599 | ENSG00000249667 |
| HGNC:49900 | LINC01260 | 20q13.12 | 79015 | ENSG00000283440 |
| HGNC:50275 | LINC01262 | 4q35.2 | 101928971 | ENSG00000250739 |
| HGNC:50282 | LINC01264 | 10q11.21 | 104266963 | ENSG00000229630 |
| HGNC:50297 | LINC01265 | 5p13.1 | 101926904 |  |
| HGNC:50309 | LINC01266 | 3p26.3 | 101927215 | ENSG00000224957 |
| HGNC:50320 | LINC01267 | 3p25.1 | 101927565 | ENSG00000251576 |
| HGNC:50323 | LINC01268 | 6q21 | 285758 | ENSG00000227502 |
| HGNC:50325 | LINC01269 | 14q24.2 | 103695436 | ENSG00000258689 |
| HGNC:27658 | LINC01270 | 20q13.13 | 284751 | ENSG00000203999 |
| HGNC:50327 | LINC01271 | 20q13.13 | 101927586 | ENSG00000233077 |
| HGNC:50329 | LINC01273 | 20q13.13 | 101927541 | ENSG00000231742 |
| HGNC:50331 | LINC01275 | 20q13.13 | 101927512 | ENSG00000237595 |
| HGNC:50333 | LINC01276 | 6p21.1 | 103106903 | ENSG00000226917 |
| HGNC:50334 | LINC01277 | 6q24.2 | 100507489 | ENSG00000229017 |
| HGNC:28090 | LINC01278 | Xq11.1 | 92249 | ENSG00000235437 |
| HGNC:50335 | LINC01279 | 3q13.2 | 100506621 | ENSG00000272761 |
| HGNC:50336 | LINC01280 | 2q35 | 101928232 | ENSG00000224391 |
| HGNC:50337 | LINC01281 | Xp11.4 | 286442 | ENSG00000235304 |
| HGNC:50338 | LINC01282 | Xp11.4 | 101927449 | ENSG00000236747 |
| HGNC:50339 | LINC01283 | Xp11.4 | 107985711 | ENSG00000234191 |
| HGNC:50342 | LINC01284 | Xp11.22 | 101926971 | ENSG00000230317 |
| HGNC:50344 | LINC01285 | Xq24 | 101928287 | ENSG00000203650 |
| HGNC:50351 | LINC01287 | 7q36.2 | 103724390 | ENSG00000234722 |
| HGNC:50353 | LINC01288 | 8p12 | 103689844 | ENSG00000254344 |
| HGNC:50354 | LINC01289 | 8q12.3 | 286184 | ENSG00000253734 |
| HGNC:50356 | LINC01290 | 16p13.13 | 106144584 | ENSG00000260468 |
| HGNC:50358 | LINC01291 | 2p12 | 102724515 | ENSG00000204792 |
| HGNC:50362 | LINC01293 | 2p12 | 101927861 | ENSG00000230836 |
| HGNC:50443 | LINC01297 | 14q11.2 | 106146148 | ENSG00000274827 |
| HGNC:32292 | LINC01298 | 8q22.1 | 619344 | ENSG00000253351 |
| HGNC:27839 | LINC01299 | 8q13.1 | 286186 | ENSG00000254081 |
| HGNC:50460 | LINC01300 | 8q24.3 | 731779 | ENSG00000253595 |
| HGNC:50464 | LINC01301 | 8q12.1 | 100505532 | ENSG00000251396 |
| HGNC:50470 | LINC01303 | 14q23.1 | 101927780 | ENSG00000250548 |
| HGNC:50472 | LINC01304 | 2p25.3 | 100505964 | ENSG00000237401 |
| HGNC:27690 | LINC01305 | 2q31.1 | 285084 | ENSG00000231453 |
| HGNC:50494 | LINC01307 | 1p21.2 | 104355286 | ENSG00000231671 |
| HGNC:50497 | LINC01309 | 13q33.1 | 104326190 | ENSG00000234551 |
| HGNC:50501 | LINC01310 | 22q13.32 | 100128946 | ENSG00000205632 |
| HGNC:50503 | LINC01311 | 22q11.21 | 100652736 | ENSG00000260924 |
| HGNC:28525 | LINC01312 | 6q23.2 | 154089 | ENSG00000223586 |
| HGNC:50513 | LINC01315 | 22q13.2 | 102723775 | ENSG00000229891 |
| HGNC:50523 | LINC01317 | 2p22.3 | 104355287 | ENSG00000203386 |
| HGNC:50524 | LINC01318 | 2p22.3 | 106144585 | ENSG00000237790 |
| HGNC:50526 | LINC01320 | 2p22.3 | 104355288 | ENSG00000228262 |
| HGNC:50528 | LINC01322 | 3q26.1 | 103695433 | ENSG00000244128 |
| HGNC:50529 | LINC01323 | 3q26.1 | 106635527 | ENSG00000241636 |
| HGNC:50530 | LINC01324 | 3q26.1 | 104355289 | ENSG00000241767 |
| HGNC:50532 | LINC01326 | 3q26.1 | 106144540 | ENSG00000244321 |
| HGNC:50533 | LINC01327 | 3q26.1 | 104310350 | ENSG00000241669 |
| HGNC:50538 | LINC01331 | 5q13.3 | 104310351 | ENSG00000248673 |
| HGNC:50540 | LINC01332 | 5q13.3 | 106144530 | ENSG00000250446 |
| HGNC:50539 | LINC01333 | 5q13.3 | 101929082 | ENSG00000249343 |
| HGNC:50542 | LINC01335 | 5q13.3 | 102503429 | ENSG00000248942 |
| HGNC:50546 | LINC01337 | 5q14.1 | 103689917 | ENSG00000251221 |
| HGNC:50547 | LINC01338 | 5q14.2 | 102546175 | ENSG00000281327 |
| HGNC:50549 | LINC01339 | 5q14.3 | 101929495 | ENSG00000248555 |
| HGNC:50550 | LINC01340 | 5q15 | 102546227 | ENSG00000250331 |
| HGNC:49457 | LINC01341 | 1q44 | 149134 | ENSG00000227953 |
| HGNC:50551 | LINC01342 | 1p36.33 | 254099 | ENSG00000223823 |
| HGNC:50553 | LINC01343 | 1p34.3 | 339442 | ENSG00000237290 |
| HGNC:50554 | LINC01344 | 1q25.3 | 400799 | ENSG00000228918 |
| HGNC:50564 | LINC01345 | 1p36.32 | 105376672 | ENSG00000226374 |
| HGNC:50563 | LINC01346 | 1p36.32 | 728716 | ENSG00000233304 |
| HGNC:50566 | LINC01347 | 1q43 | 731275 | ENSG00000214837 |
| HGNC:50567 | LINC01348 | 1q42.3 | 731656 | ENSG00000280587 |
| HGNC:50568 | LINC01349 | 1p21.2 | 100128787 | ENSG00000230402 |
| HGNC:50575 | LINC01350 | 1q25.3 | 101929093 | ENSG00000228309 |
| HGNC:50577 | LINC01351 | 1q31.1 | 101929120 | ENSG00000237457 |
| HGNC:50578 | LINC01352 | 1q41 | 101929730 | ENSG00000238078 |
| HGNC:50580 | LINC01353 | 1q32.1 | 100506775 | ENSG00000231507 |
| HGNC:50581 | LINC01354 | 1q42.2 | 100506795 | ENSG00000231768 |
| HGNC:50584 | LINC01355 | 1p36.12 | 100996511 | ENSG00000261326 |
| HGNC:50587 | LINC01356 | 1p13.2 | 100996702 | ENSG00000215866 |
| HGNC:50588 | LINC01357 | 1p13.2 | 105378912 | ENSG00000224167 |
| HGNC:50589 | LINC01358 | 1p32.1 | 101926925 | ENSG00000237352 |
| HGNC:50591 | LINC01359 | 1p31.3 | 101927084 | ENSG00000226891 |
| HGNC:50593 | LINC01360 | 1p31.1 | 101927295 | ENSG00000233973 |
| HGNC:50595 | LINC01361 | 1p31.1 | 101927498 | ENSG00000236268 |
| HGNC:50596 | LINC01362 | 1p31.1 | 103283057 | ENSG00000230817 |
| HGNC:50598 | LINC01363 | 1q24.1 | 101928484 | ENSG00000231605 |
| HGNC:50599 | LINC01364 | 1p22.3 | 100505768 | ENSG00000227290 |
| HGNC:50603 | LINC01365 | 4q26 | 101927007 | ENSG00000250772 |
| HGNC:27416 | LINC01366 | 5q35.1 | 257358 | ENSG00000235172 |
| HGNC:50608 | LINC01370 | 20q12 | 100505663 | ENSG00000237767 |
| HGNC:50623 | LINC01372 | 7q11.21 | 101929736 | ENSG00000235475 |
| HGNC:50631 | LINC01374 | 10q23.31 | 105378425 | ENSG00000280560 |
| HGNC:50632 | LINC01375 | 10q23.31 | 101926924 | ENSG00000226159 |
| HGNC:50637 | LINC01376 | 2p24.2-p24.1 | 400945 | ENSG00000236204 |
| HGNC:50642 | LINC01377 | 5p15.33 | 102467074 |  |
| HGNC:50645 | LINC01378 | 4q26 | 103689918 | ENSG00000236922 |
| HGNC:50653 | LINC01381 | 2p23.3 | 106144568 | ENSG00000230452 |
| HGNC:50657 | LINC01385 | 5q13.2 | 106144542 | ENSG00000251604 |
| HGNC:50659 | LINC01386 | 5q13.2 | 104355294 | ENSG00000251324 |
| HGNC:44660 | LINC01387 | 18p11.31 | 100130480 | ENSG00000265944 |
| HGNC:50660 | LINC01388 | 9p24.3 | 101929179 | ENSG00000231808 |
| HGNC:50661 | LINC01389 | 1p33 | 102724077 | ENSG00000225762 |
| HGNC:50666 | LINC01391 | 3q22.3 | 103344930 | ENSG00000244578 |
| HGNC:50668 | LINC01392 | 7q31.2 | 104355291 | ENSG00000233607 |
| HGNC:50669 | LINC01393 | 7q31.2 | 102724386 | ENSG00000225535 |
| HGNC:50670 | LINC01394 | 6p25.3 | 106144586 | ENSG00000281809 |
| HGNC:50674 | LINC01395 | 11q24.3 | 101929557 |  |
| HGNC:50675 | LINC01396 | 4p16.2 | 103695434 | ENSG00000273396 |
| HGNC:50677 | LINC01397 | 1p13.3 | 104355139 | ENSG00000258673 |
| HGNC:50678 | LINC01398 | 1p33 | 101929651 | ENSG00000224863 |
| HGNC:50680 | LINC01399 | 22q12.3 | 104310353 | ENSG00000233080 |
| HGNC:50681 | LINC01400 | 9p13.2 | 107080554 | ENSG00000232920 |
| HGNC:50685 | LINC01402 | Xq24 | 104797536 | ENSG00000228139 |
| HGNC:50688 | LINC01405 | 12q24.11 | 100131138 | ENSG00000185847 |
| HGNC:50702 | LINC01410 | 9q13 | 103352539 | ENSG00000238113 |
| HGNC:50703 | LINC01411 | 5q35.2 | 101928176 | ENSG00000249306 |
| HGNC:50704 | LINC01412 | 2q22.3 | 101928455 | ENSG00000232606 |
| HGNC:50705 | LINC01413 | 15q21.3 | 101928611 | ENSG00000260172 |
| HGNC:50707 | LINC01414 | 8q12.3 | 102724623 | ENSG00000253554 |
| HGNC:50709 | LINC01415 | 18q21.2 | 100132501 | ENSG00000267325 |
| HGNC:51645 | LINC01416 | 18q21.2 | 101927273 | ENSG00000260930 |
| HGNC:50712 | LINC01419 | 8q21.13 | 103352670 | ENSG00000253898 |
| HGNC:50728 | LINC01422 | 22q12.1 | 101929539 | ENSG00000223704 |
| HGNC:50732 | LINC01423 | 21q22.2 | 102724678 | ENSG00000231231 |
| HGNC:40558 | LINC01424 | 21q22.3 | 101928689 | ENSG00000236519 |
| HGNC:50733 | LINC01425 | 21q21.1 | 101927821 | ENSG00000233997 |
| HGNC:50734 | LINC01426 | 21q22.12 | 100506385 | ENSG00000234380 |
| HGNC:50737 | LINC01427 | 20p11.22 | 101929663 | ENSG00000225321 |
| HGNC:50738 | LINC01428 | 20p12.3 | 101929265 | ENSG00000228888 |
| HGNC:50741 | LINC01429 | 20q13.2 | 101927678 | ENSG00000227964 |
| HGNC:50742 | LINC01430 | 20q13.12 | 101927242 |  |
| HGNC:50744 | LINC01431 | 20p11.21 | 100505683 | ENSG00000232645 |
| HGNC:50745 | LINC01432 | 20p11.22 | 100270679 | ENSG00000234435 |
| HGNC:50746 | LINC01433 | 20p13 | 728228 | ENSG00000230176 |
| HGNC:50753 | LINC01435 | 10q25.1 | 103695365 | ENSG00000229981 |
| HGNC:50754 | LINC01436 | 21q22.12 | 100996609 | ENSG00000231106 |
| HGNC:50757 | LINC01438 | 4q25 | 106144527 | ENSG00000249519 |
| HGNC:50762 | LINC01440 | 20q13.2 | 102723578 | ENSG00000235166 |
| HGNC:50763 | LINC01441 | 20q13.2 | 101927796 | ENSG00000224008 |
| HGNC:50764 | LINC01442 | 13q21.2 | 103456507 | ENSG00000227510 |
| HGNC:50768 | LINC01443 | 18p11.21 | 400644 | ENSG00000266554 |
| HGNC:50769 | LINC01444 | 18p11.21 | 101927642 | ENSG00000264301 |
| HGNC:50771 | LINC01445 | 7p11.2 | 102723605 | ENSG00000231427 |
| HGNC:50773 | LINC01446 | 7p12.1 | 401337 | ENSG00000205628 |
| HGNC:50783 | LINC01447 | 7p12.3 | 101929086 | ENSG00000236078 |
| HGNC:50790 | LINC01448 | 7p14.1 | 101928795 | ENSG00000238284 |
| HGNC:50791 | LINC01449 | 7p14.1 | 101928773 | ENSG00000224017 |
| HGNC:50792 | LINC01450 | 7p14.1 | 101928744 | ENSG00000232458 |
| HGNC:48599 | LINC01451 | 9q34.3 | 401561 |  |
| HGNC:50545 | LINC01455 | 5q14.1 | 105616916 | ENSG00000250888 |
| HGNC:50846 | LINC01456 | Xp22.13 | 105373144 | ENSG00000225882 |
| HGNC:50858 | LINC01460 | 2p23.2 | 100129995 | ENSG00000205334 |
| HGNC:50859 | LINC01461 | 1p22.3 | 103695366 |  |
| HGNC:26364 | LINC01465 | 12q14.1 | 283416 | ENSG00000221949 |
| HGNC:50911 | LINC01467 | 14q31.1 | 101928559 | ENSG00000258977 |
| HGNC:51105 | LINC01470 | 5q33.1 | 101927134 | ENSG00000249484 |
| HGNC:51106 | LINC01471 | 3q21.3 | 101927149 | ENSG00000239921 |
| HGNC:51109 | LINC01473 | 2q32.1 | 101927217 | ENSG00000237877 |
| HGNC:51111 | LINC01474 | 9q21.13 | 101927258 | ENSG00000236849 |
| HGNC:51113 | LINC01475 | 10q24.2 | 101927324 | ENSG00000257582 |
| HGNC:51117 | LINC01476 | 17q22-q23.1 | 101927728 | ENSG00000265313 |
| HGNC:51119 | LINC01477 | 18q12.3 | 101927900 | ENSG00000261715 |
| HGNC:51121 | LINC01478 | 18q12.3 | 101927921 | ENSG00000267337 |
| HGNC:51123 | LINC01479 | 12q15 | 101927922 | ENSG00000255772 |
| HGNC:51124 | LINC01480 | 19q13.2 | 101927931 | ENSG00000270164 |
| HGNC:51126 | LINC01481 | 12q15 | 101928062 | ENSG00000257613 |
| HGNC:51128 | LINC01482 | 17q24.2 | 101928104 | ENSG00000267659 |
| HGNC:51130 | LINC01483 | 17q24.3 | 101928122 | ENSG00000227517 |
| HGNC:51136 | LINC01484 | 5q35.2 | 101928136 | ENSG00000253686 |
| HGNC:51138 | LINC01485 | 5q35.2 | 101928154 | ENSG00000254211 |
| HGNC:51137 | LINC01486 | 12q24.11 | 101928138 | ENSG00000256560 |
| HGNC:51139 | LINC01487 | 3q25.2 | 101928190 | ENSG00000241336 |
| HGNC:51144 | LINC01488 | 11q13.3 | 101928292 | ENSG00000285094 |
| HGNC:51145 | LINC01489 | 12p12.3 | 101928340 | ENSG00000255727 |
| HGNC:51146 | LINC01490 | 12q21.31 | 101928420 | ENSG00000257741 |
| HGNC:51148 | LINC01491 | 15q21.1 | 101928442 | ENSG00000259572 |
| HGNC:51149 | LINC01492 | 9q31.1 | 101928496 | ENSG00000225564 |
| HGNC:51150 | LINC01493 | 11p12 | 101928536 | ENSG00000254562 |
| HGNC:51152 | LINC01494 | 2q35 | 101928537 | ENSG00000228135 |
| HGNC:51161 | LINC01495 | 11p14.3 | 102723378 | ENSG00000255323 |
| HGNC:51162 | LINC01496 | Xp11.22 | 102723426 | ENSG00000234766 |
| HGNC:51163 | LINC01497 | 17q24.3 | 102723487 | ENSG00000237560 |
| HGNC:51164 | LINC01498 | 12q23.3 | 102723562 | ENSG00000247213 |
| HGNC:51165 | LINC01499 | 11p12 | 102723644 | ENSG00000255171 |
| HGNC:51166 | LINC01500 | 14q23.1 | 102723742 | ENSG00000258583 |
| HGNC:27988 | LINC01501 | 9q22.2 | 340515 | ENSG00000229613 |
| HGNC:51183 | LINC01502 | 9q34.3 | 100130954 | ENSG00000237339 |
| HGNC:51184 | LINC01503 | 9q34.11 | 100506119 | ENSG00000233901 |
| HGNC:51185 | LINC01504 | 9q21.13 | 100507540 | ENSG00000225434 |
| HGNC:51186 | LINC01505 | 9q31.2 | 100996590 | ENSG00000234229 |
| HGNC:51187 | LINC01506 | 9q21.11 | 101927015 | ENSG00000234506 |
| HGNC:51189 | LINC01507 | 9q21.31 | 101927477 | ENSG00000230945 |
| HGNC:51190 | LINC01508 | 9q22.2 | 101927873 | ENSG00000231107 |
| HGNC:51193 | LINC01509 | 9q31.2 | 101928720 | ENSG00000226825 |
| HGNC:51196 | LINC01510 | 7q31.2 | 100996266 | ENSG00000231210 |
| HGNC:51200 | LINC01511 | 5p15.33 | 100506791 | ENSG00000250584 |
| HGNC:51201 | LINC01512 | 6p21.1 | 100132354 |  |
| HGNC:51202 | LINC01513 | 5p15.2 | 112163642 | ENSG00000246016 |
| HGNC:51207 | LINC01514 | 10q24.31 | 101927396 | ENSG00000237579 |
| HGNC:51210 | LINC01515 | 10q21.3 | 101928913 | ENSG00000228065 |
| HGNC:51211 | LINC01516 | 10p12.1 | 101929025 | ENSG00000231422 |
| HGNC:51212 | LINC01517 | 10p12.1 | 101929218 | ENSG00000232624 |
| HGNC:51216 | LINC01518 | 10q11.21 | 101929397 | ENSG00000233515 |
| HGNC:51217 | LINC01519 | 10q23.1 | 101929624 | ENSG00000237267 |
| HGNC:51218 | LINC01520 | 10q23.1 | 101929684 | ENSG00000230962 |
| HGNC:26029 | LINC01521 | 22q12.2 | 54944 | ENSG00000213888 |
| HGNC:51224 | LINC01522 | 20q13.13 | 101927457 | ENSG00000237423 |
| HGNC:51225 | LINC01523 | 20q13.13 | 101060004 | ENSG00000229522 |
| HGNC:51228 | LINC01524 | 20q13.2 | 101927700 | ENSG00000234948 |
| HGNC:51264 | LINC01525 | 1p12 | 104355292 | ENSG00000235202 |
| HGNC:51265 | LINC01526 | 6q14.1 | 101928770 | ENSG00000224995 |
| HGNC:51266 | LINC01527 | 1q21.3 | 101927988 | ENSG00000224308 |
| HGNC:51268 | LINC01529 | 19q13.12 | 644050 | ENSG00000225872 |
| HGNC:44320 | LINC01530 | 19q13.41 | 729975 |  |
| HGNC:51270 | LINC01531 | 19q13.12 | 100128682 | ENSG00000205786 |
| HGNC:51272 | LINC01532 | 19q12 | 100505835 | ENSG00000267014 |
| HGNC:51274 | LINC01533 | 19q13.11 | 100996665 | ENSG00000267779 |
| HGNC:51281 | LINC01534 | 19q13.12 | 101927621 | ENSG00000225975 |
| HGNC:51282 | LINC01535 | 19q13.12 | 101927667 | ENSG00000226686 |
| HGNC:51301 | LINC01537 | 11q13.4 | 101928555 | ENSG00000227467 |
| HGNC:51306 | LINC01538 | 18q22.1 | 400654 | ENSG00000266952 |
| HGNC:51307 | LINC01539 | 18q21.2 | 100505474 | ENSG00000267712 |
| HGNC:51309 | LINC01541 | 18q22.3 | 100505776 | ENSG00000260676 |
| HGNC:51310 | LINC01543 | 18q11.2 | 100506787 | ENSG00000263862 |
| HGNC:51312 | LINC01544 | 18q21.33 | 100996669 | ENSG00000260440 |
| HGNC:17986 | LINC01545 | Xp11.3 | 724087 | ENSG00000204904 |
| HGNC:27336 | LINC01546 | Xp22.33 | 100129464 | ENSG00000228459 |
| HGNC:15707 | LINC01547 | 21q22.3 | 84536 | ENSG00000183250 |
| HGNC:1296 | LINC01548 | 21q22.11 | 728409 | ENSG00000229086 |
| HGNC:1277 | LINC01549 | 21q21.1 | 100505929 | ENSG00000232560 |
| HGNC:20111 | LINC01550 | 14q32.2 | 388011 | ENSG00000246223 |
| HGNC:19828 | LINC01551 | 14q12 | 387978 | ENSG00000186960 |
| HGNC:23524 | LINC01553 | 10q21.2 | 283025 | ENSG00000235931 |
| HGNC:24687 | LINC01554 | 5q15 | 202299 | ENSG00000236882 |
| HGNC:26647 | LINC01555 | 1p22.3 | 439927 | ENSG00000180869 |
| HGNC:21195 | LINC01556 | 6p22.1 | 729583 | ENSG00000204709 |
| HGNC:21235 | LINC01558 | 6q27 | 26238 | ENSG00000146521 |
| HGNC:26598 | LINC01559 | 12p13.1 | 283422 | ENSG00000180861 |
| HGNC:27333 | LINC01560 | Xp11.3 | 203414 | ENSG00000196741 |
| HGNC:31365 | LINC01561 | 10q26.12 | 404216 | ENSG00000177234 |
| HGNC:51335 | LINC01562 | 1p32.3 | 105378716 | ENSG00000203356 |
| HGNC:51343 | LINC01563 | 17p11.2 | 101060544 | ENSG00000236819 |
| HGNC:51361 | LINC01564 | 6p12.1 | 101927171 | ENSG00000235899 |
| HGNC:17099 | LINC01565 | 3q21.3 | 23434 | ENSG00000198685 |
| HGNC:27555 | LINC01566 | 16p11.1 | 283914 | ENSG00000259841 |
| HGNC:51367 | LINC01567 | 16p12.1 | 400511 | ENSG00000224310 |
| HGNC:51371 | LINC01568 | 16q22.3 | 100506172 | ENSG00000258779 |
| HGNC:51380 | LINC01569 | 16p13.3 | 100507501 | ENSG00000262468 |
| HGNC:51382 | LINC01570 | 16p13.3 | 101926950 | ENSG00000260338 |
| HGNC:51384 | LINC01571 | 16q12.1 | 101927364 | ENSG00000260057 |
| HGNC:51385 | LINC01572 | 16q22.2 | 101927957 | ENSG00000261008 |
| HGNC:51388 | LINC01574 | 5q35.2 | 102577424 | ENSG00000248859 |
| HGNC:48626 | LINC01578 | 15q26.1 | 100507217 | ENSG00000272888 |
| HGNC:27519 | LINC01579 | 15q26.1-q26.2 | 283682 | ENSG00000258754 |
| HGNC:51414 | LINC01580 | 15q26.2 | 101927129 | ENSG00000258785 |
| HGNC:51415 | LINC01581 | 15q26.2 | 101927112 | ENSG00000259724 |
| HGNC:51416 | LINC01582 | 15q26.3 | 101927332 | ENSG00000259611 |
| HGNC:51425 | LINC01583 | 15q25.2 | 101929690 | ENSG00000259518 |
| HGNC:51426 | LINC01584 | 15q25.3 | 101929701 | ENSG00000260477 |
| HGNC:51432 | LINC01585 | 15q26.1 | 101929765 | ENSG00000245479 |
| HGNC:51434 | LINC01586 | 15q26.1 | 101929743 | ENSG00000249487 |
| HGNC:13716 | LINC01587 | 4p16.2 | 10141 | ENSG00000082929 |
| HGNC:27503 | LINC01588 | 14q21.3 | 283551 | ENSG00000214900 |
| HGNC:51520 | LINC01589 | 22q13.31 | 100506737 | ENSG00000238120 |
| HGNC:21404 | LINC01590 | 6q15-q16.1 | 63914 |  |
| HGNC:27819 | LINC01591 | 8q24.22 | 286094 | ENSG00000254083 |
| HGNC:51557 | LINC01592 | 8q13.2 | 100505718 | ENSG00000253658 |
| HGNC:51583 | LINC01593 | 2q12.3 | 107178918 | ENSG00000231221 |
| HGNC:51584 | LINC01594 | 2q12.3 | 102724774 | ENSG00000225328 |
| HGNC:51586 | LINC01595 | 19q13.33 | 102725176 | ENSG00000259108 |
| HGNC:51591 | LINC01596 | 4q35.2 | 105377617 | ENSG00000250666 |
| HGNC:51594 | LINC01597 | 20q11.1 | 400841 | ENSG00000205611 |
| HGNC:27285 | LINC01599 | 14q21.3 | 196913 |  |
| HGNC:21600 | LINC01600 | 6p25.2 | 154386 | ENSG00000164385 |
| HGNC:51651 | LINC01601 | 18q12.3 | 105667213 |  |
| HGNC:51634 | LINC01602 | 8q12.1 | 100505477 | ENSG00000205293 |
| HGNC:51652 | LINC01603 | 8q13.2 | 100505739 | ENSG00000253479 |
| HGNC:51654 | LINC01605 | 8p11.23 | 100507420 | ENSG00000253161 |
| HGNC:51656 | LINC01606 | 8q12.1 | 100507651 | ENSG00000253301 |
| HGNC:51660 | LINC01607 | 8q21.13 | 101927067 | ENSG00000272138 |
| HGNC:51662 | LINC01608 | 8q23.2 | 101927459 | ENSG00000253877 |
| HGNC:51663 | LINC01609 | 8q23.2-q23.3 | 101927487 | ENSG00000253103 |
| HGNC:51791 | LINC01611 | 6q14.3 | 105377880 | ENSG00000231776 |
| HGNC:51837 | LINC01612 | 4q33 | 101928223 | ENSG00000250266 |
| HGNC:51842 | LINC01613 | 9q33.2 | 106146149 | ENSG00000261432 |
| HGNC:51847 | LINC01614 | 2q35 | 105373869 | ENSG00000230838 |
| HGNC:51898 | LINC01615 | 6q27 | 101929484 | ENSG00000223485 |
| HGNC:51900 | LINC01616 | 11p14.1 | 106456574 | ENSG00000261340 |
| HGNC:30442 | LINC01617 | 8q21.11 | 101926947 |  |
| HGNC:27195 | LINC01618 | 4q12 | 152578 | ENSG00000250302 |
| HGNC:27409 | LINC01619 | 12q21.33 | 256021 | ENSG00000257242 |
| HGNC:16195 | LINC01620 | 20q13.12 | 140834 | ENSG00000168746 |
| HGNC:14109 | LINC01621 | 6q14.1 | 89758 | ENSG00000235357 |
| HGNC:27768 | LINC01622 | 6p25.3 | 285768 |  |
| HGNC:52050 | LINC01623 | 6p22.1 | 401242 | ENSG00000225595 |
| HGNC:52051 | LINC01624 | 6q27 | 401289 | ENSG00000227508 |
| HGNC:52052 | LINC01625 | 6q24.1 | 645434 | ENSG00000238099 |
| HGNC:52257 | LINC01626 | 6q13 | 102724000 | ENSG00000223765 |
| HGNC:52258 | LINC01627 | 9p13.2 | 105376036 | ENSG00000224648 |
| HGNC:52259 | LINC01628 | 2p14 | 102724321 | ENSG00000232688 |
| HGNC:52260 | LINC01629 | 14q24.3 | 105370578 | ENSG00000258602 |
| HGNC:52295 | LINC01630 | 18q21.2 | 100287225 | ENSG00000227115 |
| HGNC:52419 | LINC01632 | 1q21.1 | 101929826 | ENSG00000277199 |
| HGNC:52420 | LINC01633 | 1q25.3 | 101929069 | ENSG00000260976 |
| HGNC:52421 | LINC01634 | 22q11.21 | 100192420 | ENSG00000235295 |
| HGNC:52422 | LINC01635 | 1p36.12 | 101928043 | ENSG00000228397 |
| HGNC:52424 | LINC01637 | 22q11.21 | 101928891 | ENSG00000237476 |
| HGNC:52425 | LINC01638 | 22q12.1 | 105372978 | ENSG00000233521 |
| HGNC:52426 | LINC01639 | 22q13.2 | 105373054 | ENSG00000236117 |
| HGNC:52427 | LINC01640 | 22q12.3 | 105373006 | ENSG00000231253 |
| HGNC:52428 | LINC01641 | 1q42.13 | 107985463 | ENSG00000234277 |
| HGNC:52430 | LINC01643 | 22q12.3 | 105373010 | ENSG00000236052 |
| HGNC:52431 | LINC01644 | 22q13.31 | 101927722 | ENSG00000218357 |
| HGNC:52432 | LINC01645 | 1q25.2 | 102724661 | ENSG00000224968 |
| HGNC:52433 | LINC01646 | 1p36.32 | 105376679 | ENSG00000232596 |
| HGNC:52434 | LINC01647 | 1p36.22 | 101929181 | ENSG00000235643 |
| HGNC:52435 | LINC01648 | 1p35.2 | 101929406 | ENSG00000233399 |
| HGNC:52436 | LINC01649 | 1p13.1 | 101928995 | ENSG00000228127 |
| HGNC:52437 | LINC01650 | 1p21.3 | 101928169 | ENSG00000230434 |
| HGNC:52439 | LINC01651 | 22q11.21 | 105372944 | ENSG00000279920 |
| HGNC:52441 | LINC01653 | 1q41 | 101929631 | ENSG00000232100 |
| HGNC:52442 | LINC01654 | 1p36.13 | 101927876 | ENSG00000261781 |
| HGNC:52443 | LINC01655 | 1q41 | 101929771 | ENSG00000227925 |
| HGNC:52444 | LINC01656 | 22q13.31 | 101927526 | ENSG00000232655 |
| HGNC:52445 | LINC01657 | 1q25.1 | 101928751 | ENSG00000224718 |
| HGNC:52447 | LINC01659 | 22q11.23 | 101929374 | ENSG00000234928 |
| HGNC:52449 | LINC01661 | 1p13.3 | 105378889 | ENSG00000237460 |
| HGNC:52452 | LINC01664 | 22q11.1 | 100996342 | ENSG00000235478 |
| HGNC:52453 | LINC01665 | 22q11.1 | 101929350 | ENSG00000235343 |
| HGNC:52454 | LINC01666 | 21p11.2 | 105372730 | ENSG00000279579 |
| HGNC:52455 | LINC01667 | 21p11.2 | 441058 | ENSG00000280081 |
| HGNC:52456 | LINC01668 | 21q22.3 | 101928311 | ENSG00000283051 |
| HGNC:52457 | LINC01669 | 21p12 | 102724354 | ENSG00000280191 |
| HGNC:52458 | LINC01670 | 21p12 | 105379487 | ENSG00000279094 |
| HGNC:52459 | LINC01671 | 21q22.3 | 101928233 | ENSG00000225431 |
| HGNC:52460 | LINC01672 | 1p36.31 | 100505887 | ENSG00000228750 |
| HGNC:52461 | LINC01673 | 21q21.3 | 105372763 | ENSG00000234052 |
| HGNC:52462 | LINC01674 | 21q11.2 | 102724188 | ENSG00000228159 |
| HGNC:52463 | LINC01675 | 1q24.1 | 105371590 | ENSG00000234142 |
| HGNC:52464 | LINC01676 | 1p21.1 | 101928476 | ENSG00000230768 |
| HGNC:52465 | LINC01677 | 1p21.1 | 105378884 | ENSG00000233047 |
| HGNC:52466 | LINC01678 | 21q22.3 | 105377138 | ENSG00000225331 |
| HGNC:52469 | LINC01679 | 21q22.3 | 101928399 | ENSG00000237989 |
| HGNC:52467 | LINC01680 | 1q31.2 | 105371660 | ENSG00000233882 |
| HGNC:52468 | LINC01681 | 1q24.2 | 105371609 | ENSG00000233985 |
| HGNC:52470 | LINC01682 | 1q42.13 | 101927504 | ENSG00000227043 |
| HGNC:52471 | LINC01683 | 21q21.1 | 105372746 | ENSG00000233480 |
| HGNC:52472 | LINC01684 | 21q21.2 | 105372751 | ENSG00000237484 |
| HGNC:52473 | LINC01685 | 1p34.3 | 105378656 | ENSG00000238063 |
| HGNC:27643 | LINC01686 | 1q25.3 | 284648 | ENSG00000261504 |
| HGNC:52474 | LINC01687 | 21q21.1 | 101927843 | ENSG00000233215 |
| HGNC:52475 | LINC01688 | 1q25.3 | 105371644 | ENSG00000227181 |
| HGNC:52476 | LINC01689 | 21q21.2 | 101927869 | ENSG00000224832 |
| HGNC:52477 | LINC01690 | 21q22.11 | 102724502 | ENSG00000228961 |
| HGNC:52479 | LINC01691 | 1p11.2 | 107985195 | ENSG00000224857 |
| HGNC:52480 | LINC01692 | 21q21.2 | 339622 | ENSG00000226983 |
| HGNC:52478 | LINC01693 | 1q32.3 | 105748977 | ENSG00000227764 |
| HGNC:52481 | LINC01694 | 21q22.3 | 105372840 | ENSG00000233922 |
| HGNC:52483 | LINC01695 | 21q21.3 | 101927973 | ENSG00000236532 |
| HGNC:52484 | LINC01696 | 1q32.2 | 105372897 | ENSG00000227940 |
| HGNC:52485 | LINC01697 | 21q21.3 | 284825 | ENSG00000232079 |
| HGNC:52486 | LINC01698 | 1q32.2 | 101929476 | ENSG00000231648 |
| HGNC:52487 | LINC01699 | 1q25.3 | 100287948 | ENSG00000179452 |
| HGNC:52488 | LINC01700 | 21q22.2 | 101928435 | ENSG00000232837 |
| HGNC:52489 | LINC01701 | 1q31.1 | 107985456 | ENSG00000232212 |
| HGNC:52490 | LINC01702 | 1p31.3 | 102724481 | ENSG00000235200 |
| HGNC:52491 | LINC01703 | 1q42.12 | 105373113 | ENSG00000225518 |
| HGNC:52492 | LINC01704 | 1q23.1 | 646268 | ENSG00000231666 |
| HGNC:52493 | LINC01705 | 1q41 | 107985307 | ENSG00000232679 |
| HGNC:52494 | LINC01706 | 20p12.3 | 101929312 | ENSG00000224711 |
| HGNC:52495 | LINC01707 | 1p31.2 | 105378785 | ENSG00000223883 |
| HGNC:52496 | LINC01708 | 1p21.2 | 101928270 | ENSG00000224445 |
| HGNC:52497 | LINC01709 | 1p21.2 | 105378872 | ENSG00000226715 |
| HGNC:52498 | LINC01710 | 1q41 | 105372925 | ENSG00000225561 |
| HGNC:28663 | LINC01711 | 20q13.32 | 79160 | ENSG00000268941 |
| HGNC:52499 | LINC01712 | 1p31.1 | 101927542 | ENSG00000231364 |
| HGNC:52500 | LINC01713 | 20p12.3 | 105372516 | ENSG00000228482 |
| HGNC:52501 | LINC01714 | 1p36.23 | 102724539 | ENSG00000227634 |
| HGNC:52502 | LINC01715 | 1p35.3 | 105378616 | ENSG00000229388 |
| HGNC:52503 | LINC01716 | 20q13.31 | 105372682 | ENSG00000225657 |
| HGNC:52504 | LINC01717 | 1q32.2 | 105372893 | ENSG00000232812 |
| HGNC:52505 | LINC01718 | 20q13.33 | 100506470 | ENSG00000229606 |
| HGNC:52506 | LINC01719 | 1q21.1 | 101928979 | ENSG00000233396 |
| HGNC:52507 | LINC01720 | 1q31.1-q31.2 | 440704 | ENSG00000231175 |
| HGNC:52508 | LINC01721 | 20p11.21 | 400839 | ENSG00000230133 |
| HGNC:52510 | LINC01722 | 20p12.1 | 101929486 | ENSG00000233048 |
| HGNC:52511 | LINC01723 | 20p12.1 | 100505515 | ENSG00000234265 |
| HGNC:52512 | LINC01724 | 1q31.3 | 105371673 | ENSG00000227421 |
| HGNC:52513 | LINC01725 | 1p31.1 | 101927587 | ENSG00000233008 |
| HGNC:52514 | LINC01726 | 20p11.22 | 101929608 | ENSG00000280350 |
| HGNC:52515 | LINC01727 | 20p11.22 | 101929625 | ENSG00000279082 |
| HGNC:52516 | LINC01728 | 20q13.12 | 105372626 | ENSG00000233277 |
| HGNC:52517 | LINC01729 | 20p12.3 | 101929207 | ENSG00000225640 |
| HGNC:52518 | LINC01730 | 20p13 | 101929125 | ENSG00000275491 |
| HGNC:52519 | LINC01731 | 1q21.2 | 105371226 | ENSG00000234283 |
| HGNC:52520 | LINC01732 | 1q25.3 | 101928973 | ENSG00000237292 |
| HGNC:52521 | LINC01733 | 20p11.1 | 101926955 | ENSG00000226203 |
| HGNC:52522 | LINC01734 | 20q12 | 339568 | ENSG00000230324 |
| HGNC:52523 | LINC01735 | 1q32.2 | 107985254 | ENSG00000261453 |
| HGNC:52524 | LINC01736 | 1q42.13 | 101927532 | ENSG00000228058 |
| HGNC:52525 | LINC01737 | 1q42.2 | 101927553 | ENSG00000232964 |
| HGNC:52526 | LINC01738 | 1p33 | 107984953 | ENSG00000227947 |
| HGNC:52527 | LINC01739 | 1p31.3 | 105378769 | ENSG00000229537 |
| HGNC:52528 | LINC01740 | 1q32.3 | 101929565 | ENSG00000228067 |
| HGNC:52529 | LINC01741 | 1q25.2 | 101928778 | ENSG00000236720 |
| HGNC:52530 | LINC01742 | 20q13.32 | 105376992 | ENSG00000275852 |
| HGNC:52531 | LINC01743 | 1q44 | 255654 | ENSG00000242042 |
| HGNC:52532 | LINC01744 | 1q42.2 | 101927683 | ENSG00000236497 |
| HGNC:52533 | LINC01745 | 1q42.2 | 105373199 | ENSG00000225919 |
| HGNC:52534 | LINC01746 | 20q11.23 | 105372608 | ENSG00000274469 |
| HGNC:52536 | LINC01747 | 20p11.21 | 105372566 | ENSG00000230400 |
| HGNC:52535 | LINC01748 | 1p32.1 | 105378763 | ENSG00000226476 |
| HGNC:52537 | LINC01749 | 20q13.33 | 63930 | ENSG00000272259 |
| HGNC:52538 | LINC01750 | 1p13.2 | 643355 | ENSG00000231437 |
| HGNC:52539 | LINC01751 | 20p12.3 | 101929288 | ENSG00000261249 |
| HGNC:52540 | LINC01752 | 20p12.2 | 101929395 | ENSG00000224961 |
| HGNC:52541 | LINC01753 | 1p32.2 | 105378739 | ENSG00000230250 |
| HGNC:52542 | LINC01754 | 20q13.12 | 102723442 | ENSG00000224565 |
| HGNC:52543 | LINC01755 | 1p32.2 | 105378738 | ENSG00000233079 |
| HGNC:52545 | LINC01756 | 1p35.3 | 101928460 | ENSG00000230523 |
| HGNC:52546 | LINC01757 | 1p36.12 | 105376827 | ENSG00000228105 |
| HGNC:52547 | LINC01758 | 1p31.1 | 105378788 | ENSG00000229639 |
| HGNC:52549 | LINC01760 | 1p21.3 | 100996630 | ENSG00000228504 |
| HGNC:52551 | LINC01761 | 1p21.3 | 440594 | ENSG00000233907 |
| HGNC:52552 | LINC01762 | 1p13.1 | 101929023 | ENSG00000233154 |
| HGNC:52554 | LINC01763 | 1p22.2 | 105378854 | ENSG00000225446 |
| HGNC:52553 | LINC01764 | 19p13.12 | 105372290 | ENSG00000267308 |
| HGNC:52555 | LINC01765 | 1p13.2 | 105378916 | ENSG00000233730 |
| HGNC:52556 | LINC01766 | 19q13.12 | 102723617 | ENSG00000224910 |
| HGNC:52557 | LINC01767 | 1p32.2 | 105378744 | ENSG00000223956 |
| HGNC:52558 | LINC01768 | 1p13.3 | 107985167 | ENSG00000228420 |
| HGNC:52560 | LINC01770 | 1p36.33 | 102724312 | ENSG00000225285 |
| HGNC:52561 | LINC01771 | 1p32.3 | 105378732 | ENSG00000225675 |
| HGNC:52562 | LINC01772 | 1p36.13 | 107984921 | ENSG00000226029 |
| HGNC:52563 | LINC01773 | 1p22.3-p22.2 | 107985519 | ENSG00000224235 |
| HGNC:52564 | LINC01774 | 1q32.2 | 105372894 | ENSG00000236950 |
| HGNC:52565 | LINC01775 | 19p13.3 | 101928602 | ENSG00000267201 |
| HGNC:52566 | LINC01776 | 1p21.3 | 729987 | ENSG00000226053 |
| HGNC:52567 | LINC01777 | 1p36.32 | 284661 | ENSG00000235054 |
| HGNC:52568 | LINC01778 | 1p35.2 | 105378622 | ENSG00000223382 |
| HGNC:52569 | LINC01779 | 1p13.1 | 107985190 | ENSG00000235933 |
| HGNC:52570 | LINC01780 | 1p12 | 105378934 | ENSG00000232650 |
| HGNC:52571 | LINC01781 | 1p31.1 | 101927412 | ENSG00000234184 |
| HGNC:52572 | LINC01782 | 19q13.11 | 101927411 | ENSG00000267204 |
| HGNC:52573 | LINC01783 | 1p36.13 | 100132147 | ENSG00000233421 |
| HGNC:52574 | LINC01784 | 1p36.21 | 105376745 | ENSG00000228338 |
| HGNC:25060 | LINC01785 | 19p12 | 374890 | ENSG00000268038 |
| HGNC:52575 | LINC01786 | 1p36.33 | 101928895 | ENSG00000230415 |
| HGNC:52576 | LINC01787 | 1p21.3 | 101928241 | ENSG00000231987 |
| HGNC:52577 | LINC01788 | 1p31.1 | 101927244 | ENSG00000229051 |
| HGNC:52578 | LINC01789 | 2q12.3 | 105373536 | ENSG00000229457 |
| HGNC:52579 | LINC01790 | 2q32.3 | 101927431 | ENSG00000230173 |
| HGNC:52581 | LINC01791 | 19q12 | 107985312 | ENSG00000267777 |
| HGNC:52582 | LINC01792 | 2q33.1 | 100507140 | ENSG00000237166 |
| HGNC:52583 | LINC01793 | 2p16.1 | 101927285 | ENSG00000222030 |
| HGNC:52584 | LINC01794 | 2p22.1 | 101929700 | ENSG00000233128 |
| HGNC:52585 | LINC01795 | 2p16.1 | 105374744 | ENSG00000225226 |
| HGNC:52586 | LINC01796 | 2q12.1 | 105373518 | ENSG00000277527 |
| HGNC:52587 | LINC01797 | 2p14 | 101927577 | ENSG00000237179 |
| HGNC:52588 | LINC01798 | 2p14 | 100507073 | ENSG00000232046 |
| HGNC:52589 | LINC01799 | 2p14 | 101060019 | ENSG00000230525 |
| HGNC:52590 | LINC01800 | 2p14 | 101927438 | ENSG00000234572 |
| HGNC:52592 | LINC01801 | 19q13.11 | 400685 | ENSG00000267767 |
| HGNC:52591 | LINC01802 | 2q33.3 | 105373852 | ENSG00000225064 |
| HGNC:52595 | LINC01803 | 2q35 | 105373889 | ENSG00000228909 |
| HGNC:52596 | LINC01804 | 2p24.3 | 101926966 | ENSG00000231031 |
| HGNC:52597 | LINC01805 | 2p14 | 105374774 | ENSG00000223863 |
| HGNC:52599 | LINC01806 | 2q24.2 | 100996579 | ENSG00000227403 |
| HGNC:52610 | LINC01807 | 2q36.3 | 101928765 | ENSG00000232023 |
| HGNC:52611 | LINC01808 | 2p24.1 | 105373460 | ENSG00000237992 |
| HGNC:52612 | LINC01809 | 2p11.2 | 101928031 | ENSG00000232548 |
| HGNC:52613 | LINC01810 | 2p25.2 | 105373400 | ENSG00000237266 |
| HGNC:52615 | LINC01811 | 3p22.3 | 101928114 | ENSG00000226320 |
| HGNC:52616 | LINC01812 | 2p14 | 101927701 | ENSG00000237013 |
| HGNC:52617 | LINC01813 | 2p16.1 | 101927165 | ENSG00000229805 |
| HGNC:52618 | LINC01814 | 2p25.1 | 101929567 | ENSG00000236008 |
| HGNC:52619 | LINC01815 | 2p12 | 100507201 | ENSG00000235519 |
| HGNC:52621 | LINC01816 | 2p13.3 | 100133985 | ENSG00000231327 |
| HGNC:52622 | LINC01817 | 2q23.3 | 105373683 | ENSG00000231420 |
| HGNC:52623 | LINC01818 | 2q23.3 | 105373684 | ENSG00000230645 |
| HGNC:52624 | LINC01819 | 2p21 | 102723854 | ENSG00000231826 |
| HGNC:52625 | LINC01820 | 2p21 | 105374582 | ENSG00000228100 |
| HGNC:52626 | LINC01821 | 2q32.3 | 101927406 | ENSG00000225539 |
| HGNC:52627 | LINC01822 | 2p24.1 | 645949 | ENSG00000229621 |
| HGNC:52628 | LINC01823 | 2q14.3 | 101927801 | ENSG00000224655 |
| HGNC:52630 | LINC01824 | 2p25.2 | 107985844 | ENSG00000226488 |
| HGNC:52631 | LINC01825 | 2q32.3 | 107985970 | ENSG00000223466 |
| HGNC:52632 | LINC01826 | 2q14.3 | 107985818 | ENSG00000232740 |
| HGNC:52633 | LINC01827 | 2q32.3 | 105373818 | ENSG00000234919 |
| HGNC:52634 | LINC01828 | 2p14 | 102800447 | ENSG00000235885 |
| HGNC:52635 | LINC01829 | 2p14 | 644838 | ENSG00000236780 |
| HGNC:52636 | LINC01830 | 2p24.1 | 105374322 | ENSG00000231200 |
| HGNC:52637 | LINC01831 | 2q12.1 | 101927331 | ENSG00000225765 |
| HGNC:52638 | LINC01832 | 2q22.1 | 105373635 | ENSG00000224231 |
| HGNC:52644 | LINC01833 | 2p21 | 107985879 | ENSG00000259439 |
| HGNC:52648 | LINC01834 | 19q12 | 107985280 | ENSG00000261316 |
| HGNC:52652 | LINC01836 | 19p13.3 | 107985343 | ENSG00000267530 |
| HGNC:52653 | LINC01837 | 19q12-q13.11 | 105372363 | ENSG00000267489 |
| HGNC:52654 | LINC01838 | 19q13.11 | 100652911 | ENSG00000269037 |
| HGNC:41330 | LINC01839 | 3q27.1 | 105374251 | ENSG00000227509 |
| HGNC:40209 | LINC01840 | 3q27.1 | 100874079 | ENSG00000230215 |
| HGNC:52655 | LINC01841 | 19p13.12 | 105372288 | ENSG00000266913 |
| HGNC:52656 | LINC01842 | 19p13.12 | 101928845 | ENSG00000267147 |
| HGNC:52659 | LINC01843 | 5q31.1 | 101927934 | ENSG00000251169 |
| HGNC:52660 | LINC01844 | 5q31.3 | 101926975 | ENSG00000236714 |
| HGNC:27747 | LINC01845 | 5q33.3 | 285627 | ENSG00000253298 |
| HGNC:52661 | LINC01846 | 5q15 | 105379098 | ENSG00000248901 |
| HGNC:52662 | LINC01847 | 5q33.3 | 101927766 | ENSG00000253311 |
| HGNC:52663 | LINC01848 | 5q21.3 | 100289673 | ENSG00000254106 |
| HGNC:52665 | LINC01849 | 2q11.2 | 105373507 | ENSG00000234988 |
| HGNC:52666 | LINC01850 | 2q23.3 | 107985951 | ENSG00000227708 |
| HGNC:52667 | LINC01851 | 2p12 | 101927926 | ENSG00000233605 |
| HGNC:52668 | LINC01852 | 15q14 | 107984773 | ENSG00000236914 |
| HGNC:52669 | LINC01853 | 2q22.1 | 105373647 | ENSG00000224028 |
| HGNC:52670 | LINC01854 | 2q21.1 | 151121 | ENSG00000204460 |
| HGNC:52675 | LINC01855 | 19p13.12 | 105372292 | ENSG00000267517 |
| HGNC:52672 | LINC01856 | 2q21.1 | 101927924 | ENSG00000237574 |
| HGNC:52673 | LINC01857 | 2q33.3 | 102724714 | ENSG00000224137 |
| HGNC:52676 | LINC01858 | 19p12 | 101929144 | ENSG00000261615 |
| HGNC:52677 | LINC01859 | 19p12 | 101929164 | ENSG00000261558 |
| HGNC:52680 | LINC01861 | 5q33.2 | 105378238 | ENSG00000251183 |
| HGNC:52681 | LINC01862 | 19p13.2 | 105372267 | ENSG00000268480 |
| HGNC:52682 | LINC01863 | 5q35.2 | 107986480 | ENSG00000253959 |
| HGNC:52683 | LINC01864 | 19q13.43 | 101928886 | ENSG00000267522 |
| HGNC:52684 | LINC01865 | 2p25.3 | 105373350 | ENSG00000233684 |
| HGNC:52685 | LINC01866 | 2p24.2 | 107985806 | ENSG00000237670 |
| HGNC:52687 | LINC01867 | 2p16.3 | 105374596 | ENSG00000225444 |
| HGNC:52688 | LINC01868 | 2q11.2 | 107985924 | ENSG00000234169 |
| HGNC:25050 | LINC01869 | 19q13.33 | 284365 | ENSG00000180279 |
| HGNC:52689 | LINC01870 | 2q11.2 | 107985925 | ENSG00000223826 |
| HGNC:52690 | LINC01871 | 2p25.1 | 101929531 | ENSG00000235576 |
| HGNC:52691 | LINC01872 | 19q13.41 | 105372444 | ENSG00000268318 |
| HGNC:52692 | LINC01873 | 2p14 | 729348 | ENSG00000232164 |
| HGNC:52693 | LINC01874 | 2p25.3 | 727944 | ENSG00000223985 |
| HGNC:52694 | LINC01875 | 2p25.3 | 101927362 | ENSG00000225942 |
| HGNC:52695 | LINC01876 | 2q24.1 | 101929378 | ENSG00000226383 |
| HGNC:52696 | LINC01877 | 2q33.1 | 101927641 | ENSG00000238217 |
| HGNC:52697 | LINC01878 | 2q34 | 102725079 | ENSG00000234308 |
| HGNC:52698 | LINC01879 | 18q23 | 400661 | ENSG00000276397 |
| HGNC:52699 | LINC01880 | 2q37.3 | 105373979 | ENSG00000232002 |
| HGNC:52700 | LINC01881 | 2q37.3 | 728323 | ENSG00000220804 |
| HGNC:52701 | LINC01882 | 18p11.21 | 100996324 | ENSG00000267654 |
| HGNC:52702 | LINC01883 | 2p22.1 | 100996902 | ENSG00000235009 |
| HGNC:52703 | LINC01884 | 2p24.1 | 102723362 | ENSG00000233587 |
| HGNC:52704 | LINC01885 | 2q12.3 | 105373538 | ENSG00000237880 |
| HGNC:52705 | LINC01886 | 2q12.3 | 105373537 | ENSG00000224568 |
| HGNC:52706 | LINC01887 | 18p11.22 | 102724470 | ENSG00000266604 |
| HGNC:52707 | LINC01888 | 2p13.3 | 107985893 | ENSG00000237576 |
| HGNC:52708 | LINC01889 | 2q14.3 | 105373597 | ENSG00000235491 |
| HGNC:52709 | LINC01890 | 2p13.3 | 105374791 | ENSG00000228329 |
| HGNC:52710 | LINC01891 | 2q37.1 | 105373934 | ENSG00000231682 |
| HGNC:52711 | LINC01892 | 18p11.31 | 105371969 | ENSG00000265514 |
| HGNC:52712 | LINC01893 | 18q23 | 105372207 | ENSG00000264260 |
| HGNC:52713 | LINC01894 | 18q11.2 | 105372030 | ENSG00000264345 |
| HGNC:52714 | LINC01895 | 18p11.31 | 105371964 | ENSG00000259256 |
| HGNC:52715 | LINC01896 | 18q23 | 645321 | ENSG00000263146 |
| HGNC:52716 | LINC01897 | 18q21.31 | 107985146 | ENSG00000267209 |
| HGNC:52717 | LINC01898 | 18q23 | 100505853 | ENSG00000261194 |
| HGNC:52718 | LINC01899 | 18q22.3 | 102724913 | ENSG00000265352 |
| HGNC:52719 | LINC01900 | 18q11.2 | 102724208 | ENSG00000265758 |
| HGNC:52720 | LINC01901 | 18q12.3 | 105372080 | ENSG00000267413 |
| HGNC:52721 | LINC01902 | 18q12.3 | 105372079 | ENSG00000283503 |
| HGNC:52722 | LINC01903 | 18q22.1 | 101927430 | ENSG00000265555 |
| HGNC:52723 | LINC01904 | 18p11.32 | 388456 | ENSG00000259837 |
| HGNC:52724 | LINC01905 | 18q21.2 | 102724698 | ENSG00000267057 |
| HGNC:52725 | LINC01906 | 18p11.21 | 105372011 | ENSG00000265786 |
| HGNC:52726 | LINC01907 | 2q37.1 | 151475 | ENSG00000226125 |
| HGNC:52727 | LINC01908 | 18q11.2 | 105372037 | ENSG00000265374 |
| HGNC:52728 | LINC01909 | 18q22.2 | 101927481 | ENSG00000266258 |
| HGNC:52729 | LINC01910 | 18q22.2 | 101060542 | ENSG00000266278 |
| HGNC:52730 | LINC01911 | 2q22.3 | 105373669 | ENSG00000231040 |
| HGNC:52731 | LINC01912 | 18q22.1 | 105372175 | ENSG00000264699 |
| HGNC:52732 | LINC01913 | 2p21 | 388942 | ENSG00000214691 |
| HGNC:52733 | LINC01914 | 2p21 | 101929723 | ENSG00000234362 |
| HGNC:52734 | LINC01915 | 18q11.2 | 729950 | ENSG00000265485 |
| HGNC:52735 | LINC01916 | 18q22.1 | 107985128 | ENSG00000264232 |
| HGNC:52736 | LINC01917 | 18q21.2 | 101928167 | ENSG00000260433 |
| HGNC:52737 | LINC01918 | 2q12.1 | 105373984 | ENSG00000226508 |
| HGNC:52739 | LINC01919 | 18q21.2 | 102724651 | ENSG00000263438 |
| HGNC:52738 | LINC01920 | 2q23.3 | 101929260 | ENSG00000236049 |
| HGNC:52740 | LINC01921 | 2q35 | 101928327 | ENSG00000223874 |
| HGNC:52741 | LINC01922 | 18q22.3 | 101927606 | ENSG00000259779 |
| HGNC:52742 | LINC01923 | 2q33.1 | 101927619 | ENSG00000236653 |
| HGNC:27600 | LINC01924 | 18q22.1 | 284294 | ENSG00000267134 |
| HGNC:52745 | LINC01925 | 18p11.32 | 105376854 | ENSG00000264265 |
| HGNC:52748 | LINC01926 | 18q21.32 | 105372147 | ENSG00000267593 |
| HGNC:52749 | LINC01927 | 18q23 | 101927651 | ENSG00000266312 |
| HGNC:52750 | LINC01928 | 18p11.21 | 105371994 | ENSG00000267425 |
| HGNC:52751 | LINC01929 | 18q21.2 | 101927229 | ENSG00000267013 |
| HGNC:52744 | LINC01930 | 1p21.3 | 109729128 | ENSG00000269998 |
| HGNC:52743 | LINC01931 | 2q23.3 | 150596 | ENSG00000162947 |
| HGNC:52755 | LINC01932 | 5q33.3 | 105377682 | ENSG00000253315 |
| HGNC:52756 | LINC01933 | 5q33.1 | 101927115 | ENSG00000254226 |
| HGNC:52757 | LINC01934 | 2q31.3 | 101927156 | ENSG00000234663 |
| HGNC:52758 | LINC01935 | 2q12.1 | 105373519 | ENSG00000224095 |
| HGNC:52759 | LINC01936 | 2p23.1 | 285043 | ENSG00000235997 |
| HGNC:52760 | LINC01937 | 2q37.3 | 105373962 | ENSG00000234279 |
| HGNC:52761 | LINC01938 | 5q34 | 105377701 | ENSG00000254066 |
| HGNC:52762 | LINC01939 | 2p25.3 | 101060385 | ENSG00000228799 |
| HGNC:52763 | LINC01940 | 2q37.3 | 401039 | ENSG00000227744 |
| HGNC:52764 | LINC01941 | 2q14.3 | 105373600 | ENSG00000226813 |
| HGNC:52766 | LINC01942 | 5q35.2 | 105377736 | ENSG00000253428 |
| HGNC:52767 | LINC01943 | 2p11.2 | 101928173 | ENSG00000280721 |
| HGNC:52768 | LINC01944 | 5q35.1 | 105377728 | ENSG00000254299 |
| HGNC:52769 | LINC01945 | 2q21.2 | 101928067 | ENSG00000236485 |
| HGNC:52770 | LINC01946 | 2p23.1-p22.3 | 105374449 | ENSG00000223647 |
| HGNC:52771 | LINC01947 | 5q34 | 102557615 | ENSG00000254130 |
| HGNC:52772 | LINC01948 | 5q11.2 | 102467147 | ENSG00000248727 |
| HGNC:25650 | LINC01949 | 5q14.3 | 55338 | ENSG00000233828 |
| HGNC:52773 | LINC01950 | 5q21.3 | 102467213 | ENSG00000251027 |
| HGNC:52774 | LINC01951 | 5q35.2 | 441116 | ENSG00000204754 |
| HGNC:52775 | LINC01952 | 7p13 | 105375261 | ENSG00000234183 |
| HGNC:52776 | LINC01953 | 2q34 | 105373863 | ENSG00000236193 |
| HGNC:52779 | LINC01954 | 2p25.1 | 101929733 | ENSG00000271952 |
| HGNC:52780 | LINC01955 | 2p11.2 | 105374847 | ENSG00000281477 |
| HGNC:52777 | LINC01956 | 2q14.2 | 107985816 | ENSG00000258910 |
| HGNC:52783 | LINC01957 | 5q22.3 | 101927059 | ENSG00000251542 |
| HGNC:52784 | LINC01958 | 2q24.1 | 105373708 | ENSG00000283436 |
| HGNC:27965 | LINC01959 | 5q31.1 | 340074 | ENSG00000251045 |
| HGNC:52785 | LINC01960 | 2q31.1 | 100128905 | ENSG00000260868 |
| HGNC:52786 | LINC01961 | 2q14.1 | 101927424 | ENSG00000234148 |
| HGNC:52787 | LINC01962 | 5q35.3 | 102577426 | ENSG00000248473 |
| HGNC:25283 | LINC01963 | 2q35 | 150967 | ENSG00000260804 |
| HGNC:52789 | LINC01964 | 2p11.2 | 100996478 | ENSG00000260840 |
| HGNC:52790 | LINC01965 | 2q12.1 | 107985928 | ENSG00000256637 |
| HGNC:52792 | LINC01966 | 2q22.3 | 105373662 | ENSG00000268580 |
| HGNC:52793 | LINC01967 | 3p24.1 | 107986041 | ENSG00000235493 |
| HGNC:52794 | LINC01968 | 3q29 | 100507391 | ENSG00000237222 |
| HGNC:52795 | LINC01969 | 17q21.33 | 101927230 | ENSG00000251085 |
| HGNC:52796 | LINC01970 | 17q25.3 | 101929511 | ENSG00000265692 |
| HGNC:52797 | LINC01971 | 17q25.3 | 105371927 | ENSG00000278200 |
| HGNC:52798 | LINC01972 | 3q29 | 105374293 | ENSG00000230401 |
| HGNC:52800 | LINC01973 | 17q25.3 | 400624 | ENSG00000204283 |
| HGNC:52801 | LINC01974 | 17q21.32 | 105371798 | ENSG00000262031 |
| HGNC:52802 | LINC01975 | 17p13.2 | 105371496 | ENSG00000263312 |
| HGNC:52803 | LINC01976 | 17q21.31 | 107546764 | ENSG00000261514 |
| HGNC:52804 | LINC01977 | 17q25.3 | 105371919 | ENSG00000262772 |
| HGNC:52806 | LINC01978 | 17q25.3 | 101928738 | ENSG00000262188 |
| HGNC:52807 | LINC01979 | 17q25.3 | 101928766 | ENSG00000262585 |
| HGNC:52808 | LINC01980 | 3p24.1 | 105377007 | ENSG00000225548 |
| HGNC:52809 | LINC01981 | 3p24.1 | 100996624 | ENSG00000229243 |
| HGNC:52812 | LINC01982 | 17q22 | 105371830 | ENSG00000263317 |
| HGNC:52813 | LINC01983 | 3q29 | 101929697 | ENSG00000223783 |
| HGNC:52814 | LINC01984 | 17p11.2 | 107987252 | ENSG00000265556 |
| HGNC:52816 | LINC01985 | 3p24.1 | 101928015 | ENSG00000227260 |
| HGNC:52817 | LINC01986 | 3p26.3 | 102723448 | ENSG00000223587 |
| HGNC:52819 | LINC01987 | 17q25.3 | 100132174 | ENSG00000267790 |
| HGNC:52820 | LINC01988 | 3p21.31 | 100506319 | ENSG00000283036 |
| HGNC:52821 | LINC01989 | 17q12 | 101927239 | ENSG00000261156 |
| HGNC:52822 | LINC01990 | 3q13.12 | 101929607 | ENSG00000273125 |
| HGNC:52823 | LINC01991 | 3q27.3 | 105374266 | ENSG00000224187 |
| HGNC:52824 | LINC01992 | 17q11.2 | 105371708 | ENSG00000260019 |
| HGNC:52826 | LINC01993 | 17q25.3 | 100996291 | ENSG00000204277 |
| HGNC:52827 | LINC01994 | 3q26.33 | 401103 | ENSG00000241098 |
| HGNC:52828 | LINC01995 | 3q26.33 | 105374244 | ENSG00000244247 |
| HGNC:52830 | LINC01996 | 17p13.2 | 400568 | ENSG00000261863 |
| HGNC:52831 | LINC01997 | 3q26.2 | 105374201 | ENSG00000241383 |
| HGNC:52832 | LINC01998 | 3q25.1 | 107986046 | ENSG00000243321 |
| HGNC:52834 | LINC01999 | 17q23.2 | 388406 | ENSG00000267772 |
| HGNC:52835 | LINC02000 | 3q22.2 | 100507210 | ENSG00000243832 |
| HGNC:52836 | LINC02001 | 17q12 | 105371743 | ENSG00000267321 |
| HGNC:52837 | LINC02002 | 17p11.2 | 105371595 | ENSG00000263609 |
| HGNC:27099 | LINC02003 | 17q24.3 | 146795 | ENSG00000264026 |
| HGNC:52838 | LINC02004 | 3q22.2 | 105374119 | ENSG00000240006 |
| HGNC:52839 | LINC02005 | 3p13 | 105377165 | ENSG00000242741 |
| HGNC:52842 | LINC02006 | 3q25.2 | 105374165 | ENSG00000238755 |
| HGNC:52844 | LINC02008 | 3p12.2 | 105377180 | ENSG00000239440 |
| HGNC:52845 | LINC02009 | 3p21.31 | 105377068 | ENSG00000283646 |
| HGNC:52846 | LINC02010 | 3q24 | 101927866 | ENSG00000242671 |
| HGNC:27191 | LINC02011 | 3p25.1 | 152274 | ENSG00000260902 |
| HGNC:52847 | LINC02012 | 3q29 | 100129516 | ENSG00000272989 |
| HGNC:52848 | LINC02013 | 3q28 | 105374272 | ENSG00000228730 |
| HGNC:52849 | LINC02014 | 3q22.1 | 105374105 | ENSG00000248243 |
| HGNC:52850 | LINC02015 | 3q26.32 | 102724550 | ENSG00000231574 |
| HGNC:52851 | LINC02016 | 3q21.3 | 101927123 | ENSG00000244215 |
| HGNC:52852 | LINC02017 | 3p14.3 | 105377096 | ENSG00000243572 |
| HGNC:52853 | LINC02018 | 3p12.3 | 107986100 | ENSG00000272690 |
| HGNC:52854 | LINC02019 | 3p21.2 | 107986085 | ENSG00000273356 |
| HGNC:52855 | LINC02020 | 3q27.3 | 107986164 | ENSG00000234548 |
| HGNC:52856 | LINC02021 | 3q22.1 | 105374104 | ENSG00000249846 |
| HGNC:52857 | LINC02022 | 3p25.2 | 105376955 | ENSG00000232746 |
| HGNC:52858 | LINC02023 | 3q26.1 | 101928405 | ENSG00000239205 |
| HGNC:52859 | LINC02024 | 3q13.32 | 105374057 | ENSG00000241213 |
| HGNC:52860 | LINC02025 | 3p12.1 | 105377192 | ENSG00000242339 |
| HGNC:52861 | LINC02026 | 3q29 | 647323 | ENSG00000214146 |
| HGNC:52862 | LINC02027 | 3p12.2 | 728290 | ENSG00000243694 |
| HGNC:27718 | LINC02028 | 3q29 | 285389 | ENSG00000230102 |
| HGNC:52863 | LINC02029 | 3q25.31 | 105374177 | ENSG00000241544 |
| HGNC:52864 | LINC02030 | 3p14.3 | 105377098 | ENSG00000240708 |
| HGNC:52865 | LINC02031 | 3q26.33 | 102724617 | ENSG00000238837 |
| HGNC:52866 | LINC02032 | 3q24 | 100507461 | ENSG00000241131 |
| HGNC:52867 | LINC02033 | 3p22.2 | 105377031 | ENSG00000279727 |
| HGNC:52868 | LINC02034 | 3q21.3 | 107986125 | ENSG00000282975 |
| HGNC:52875 | LINC02035 | 3q21.1 | 100129550 | ENSG00000273033 |
| HGNC:52876 | LINC02036 | 3q29 | 100505920 | ENSG00000225742 |
| HGNC:52877 | LINC02037 | 3q29 | 101929337 | ENSG00000238097 |
| HGNC:52878 | LINC02038 | 3q29 | 105374285 | ENSG00000229155 |
| HGNC:52879 | LINC02039 | 5q23.2 | 102546228 | ENSG00000248107 |
| HGNC:52880 | LINC02040 | 3p14.1 | 102724763 | ENSG00000243149 |
| HGNC:52881 | LINC02041 | 3q27.3 | 105374261 | ENSG00000228952 |
| HGNC:52882 | LINC02042 | 3q13.2 | 101929694 | ENSG00000240893 |
| HGNC:52883 | LINC02043 | 3q27.3 | 102724699 | ENSG00000232233 |
| HGNC:52884 | LINC02044 | 3q13.2 | 101929717 | ENSG00000243795 |
| HGNC:52885 | LINC02045 | 3q24 | 105374146 | ENSG00000243347 |
| HGNC:52886 | LINC02046 | 3q24 | 105374149 | ENSG00000242440 |
| HGNC:52887 | LINC02047 | 3p13 | 101927346 | ENSG00000239454 |
| HGNC:52888 | LINC02048 | 3q29 | 105374289 | ENSG00000228271 |
| HGNC:52889 | LINC02049 | 3q13.33 | 101926983 | ENSG00000243593 |
| HGNC:52890 | LINC02050 | 3p12.2 | 105377175 | ENSG00000242781 |
| HGNC:52891 | LINC02051 | 3q27.3 | 107986165 | ENSG00000226859 |
| HGNC:27372 | LINC02052 | 3q27.3 | 253573 | ENSG00000224406 |
| HGNC:52893 | LINC02053 | 3q26.33 | 100505609 | ENSG00000241696 |
| HGNC:52895 | LINC02055 | 8q24.23 | 107986980 | ENSG00000254101 |
| HGNC:52898 | LINC02056 | 5q13.2 | 102477328 | ENSG00000248371 |
| HGNC:52900 | LINC02057 | 5q12.1 | 105378992 | ENSG00000249279 |
| HGNC:52901 | LINC02058 | 5q14.3 | 107984117 | ENSG00000248528 |
| HGNC:52902 | LINC02059 | 5q14.3 | 100505878 | ENSG00000250544 |
| HGNC:52904 | LINC02060 | 5q14.3 | 102546226 | ENSG00000250156 |
| HGNC:52906 | LINC02061 | 5p13.3 | 105374714 | ENSG00000250885 |
| HGNC:52907 | LINC02062 | 5q21.1 | 102724810 | ENSG00000248489 |
| HGNC:52908 | LINC02063 | 5p15.33 | 105374627 | ENSG00000250921 |
| HGNC:52909 | LINC02064 | 5p13.3 | 101929681 | ENSG00000248391 |
| HGNC:52910 | LINC02065 | 5q12.3 | 101928741 | ENSG00000248846 |
| HGNC:52911 | LINC02066 | 3q25.1 | 105374158 | ENSG00000241151 |
| HGNC:52913 | LINC02067 | 3q26.1 | 101243545 | ENSG00000240567 |
| HGNC:52914 | LINC02068 | 3q26.31 | 105374219 | ENSG00000223387 |
| HGNC:52915 | LINC02069 | 3q27.1 | 101928992 | ENSG00000229433 |
| HGNC:52916 | LINC02070 | 3p12.1 | 101927494 | ENSG00000241328 |
| HGNC:52917 | LINC02071 | 17q21.33 | 101927274 | ENSG00000249383 |
| HGNC:52918 | LINC02072 | 17q21.33 | 440446 | ENSG00000225860 |
| HGNC:52919 | LINC02073 | 17q21.33 | 105371828 | ENSG00000267452 |
| HGNC:52920 | LINC02074 | 17q25.1 | 102723567 | ENSG00000266357 |
| HGNC:52921 | LINC02075 | 17q21.33 | 101927207 | ENSG00000249497 |
| HGNC:52924 | LINC02076 | 17p11.2 | 400579 | ENSG00000220161 |
| HGNC:52925 | LINC02077 | 3p12.3 | 105377172 | ENSG00000244461 |
| HGNC:52926 | LINC02078 | 17q25.3 | 100652929 | ENSG00000267719 |
| HGNC:52927 | LINC02079 | 17q12 | 105371766 | ENSG00000266013 |
| HGNC:52928 | LINC02080 | 17q25.1-q25.2 | 101928514 | ENSG00000267065 |
| HGNC:52931 | LINC02082 | 3q26.2 | 100507661 | ENSG00000242268 |
| HGNC:52933 | LINC02083 | 3q25.2 | 107986147 | ENSG00000243012 |
| HGNC:52934 | LINC02084 | 3p24.1 | 105377006 | ENSG00000272282 |
| HGNC:27190 | LINC02085 | 3q12.3 | 152225 | ENSG00000214407 |
| HGNC:52936 | LINC02086 | 17q21.32 | 105371809 | ENSG00000244649 |
| HGNC:52938 | LINC02087 | 17p12 | 101928567 | ENSG00000237057 |
| HGNC:52939 | LINC02088 | 17p11.2 | 105371582 | ENSG00000227685 |
| HGNC:52940 | LINC02089 | 17q22 | 105371831 | ENSG00000226364 |
| HGNC:52941 | LINC02090 | 17p11.2 | 105371562 | ENSG00000230969 |
| HGNC:52942 | LINC02091 | 17p13.3 | 100506371 | ENSG00000273172 |
| HGNC:52943 | LINC02092 | 17q25.1 | 400620 | ENSG00000234721 |
| HGNC:52944 | LINC02093 | 17p12 | 105371541 | ENSG00000234634 |
| HGNC:52945 | LINC02094 | 17p11.2 | 107984995 | ENSG00000227078 |
| HGNC:52947 | LINC02096 | 17p12 | 107984977 | ENSG00000238212 |
| HGNC:52948 | LINC02097 | 17q24.3 | 101928205 | ENSG00000226101 |
| HGNC:52950 | LINC02098 | 11q24.3 | 105369564 | ENSG00000272575 |
| HGNC:52953 | LINC02099 | 8p12 | 101929450 | ENSG00000253490 |
| HGNC:52955 | LINC02100 | 5p14.3 | 107986408 | ENSG00000248693 |
| HGNC:52956 | LINC02101 | 5q11.2 | 101928569 | ENSG00000248132 |
| HGNC:52957 | LINC02102 | 5p15.31 | 100505625 | ENSG00000248677 |
| HGNC:52958 | LINC02103 | 5p14.1 | 105374698 | ENSG00000249785 |
| HGNC:52959 | LINC02104 | 5p13.1 | 101926940 | ENSG00000271334 |
| HGNC:52960 | LINC02105 | 5q11.2 | 105378966 | ENSG00000250447 |
| HGNC:52961 | LINC02106 | 5q11.1 | 100287592 | ENSG00000251573 |
| HGNC:52962 | LINC02107 | 5p13.2 | 105374731 | ENSG00000250003 |
| HGNC:52963 | LINC02108 | 5q11.2 | 101928600 | ENSG00000250127 |
| HGNC:52964 | LINC02109 | 5p13.3 | 101929660 | ENSG00000259786 |
| HGNC:52965 | LINC02110 | 5p13.2 | 105374729 | ENSG00000251518 |
| HGNC:52966 | LINC02111 | 5p15.1 | 401177 | ENSG00000250822 |
| HGNC:27756 | LINC02112 | 5p15.31-p15.2 | 285692 | ENSG00000249781 |
| HGNC:52967 | LINC02113 | 5q21.1 | 102724855 | ENSG00000249515 |
| HGNC:52968 | LINC02114 | 5p15.32 | 101929153 | ENSG00000249521 |
| HGNC:52970 | LINC02115 | 5q21.2 | 102467212 | ENSG00000248757 |
| HGNC:52971 | LINC02116 | 5p15.33 | 101929034 | ENSG00000250417 |
| HGNC:52972 | LINC02117 | 5p13.2 | 105374728 | ENSG00000248539 |
| HGNC:52974 | LINC02118 | 5q11.2 | 105378960 | ENSG00000248789 |
| HGNC:52975 | LINC02119 | 5p13.2 | 101929745 | ENSG00000248461 |
| HGNC:27971 | LINC02120 | 5p13.3 | 340113 | ENSG00000248279 |
| HGNC:52977 | LINC02121 | 5p15.32 | 105374631 | ENSG00000250529 |
| HGNC:52979 | LINC02122 | 5q13.3 | 105379036 | ENSG00000248474 |
| HGNC:52980 | LINC02123 | 5p15.31 | 101929261 | ENSG00000250668 |
| HGNC:52981 | LINC02124 | 16p13.3 | 105371048 | ENSG00000259947 |
| HGNC:52982 | LINC02125 | 16q23.1 | 101928203 | ENSG00000250514 |
| HGNC:52983 | LINC02126 | 16q21 | 101927650 | ENSG00000259847 |
| HGNC:52985 | LINC02127 | 16q12.1 | 101927334 | ENSG00000261637 |
| HGNC:52986 | LINC02128 | 16q12.1 | 107983964 | ENSG00000261241 |
| HGNC:52988 | LINC02129 | 16p12.1 | 105371156 | ENSG00000261045 |
| HGNC:52989 | LINC02130 | 16p13.12 | 105447648 | ENSG00000260009 |
| HGNC:52991 | LINC02131 | 16q23.1 | 105371350 | ENSG00000261154 |
| HGNC:52992 | LINC02132 | 16q24.1 | 107984811 | ENSG00000268804 |
| HGNC:52993 | LINC02133 | 16q12.1 | 101927132 | ENSG00000261231 |
| HGNC:52994 | LINC02134 | 16q12.1 | 105371238 | ENSG00000260450 |
| HGNC:27094 | LINC02135 | 16q24.1 | 146513 | ENSG00000268532 |
| HGNC:52995 | LINC02136 | 16q22.2 | 105371333 | ENSG00000261348 |
| HGNC:52997 | LINC02137 | 16q21 | 105371295 | ENSG00000260186 |
| HGNC:52998 | LINC02138 | 16q24.3 | 400558 | ENSG00000205015 |
| HGNC:52999 | LINC02139 | 16q24.1 | 400548 | ENSG00000278214 |
| HGNC:53000 | LINC02140 | 16q12.2 | 100996345 | ENSG00000261803 |
| HGNC:53001 | LINC02141 | 16q21 | 101927580 | ENSG00000261807 |
| HGNC:53002 | LINC02142 | 5p15.31 | 105374644 | ENSG00000223597 |
| HGNC:53003 | LINC02143 | 5q34 | 101927835 | ENSG00000253236 |
| HGNC:53004 | LINC02144 | 5q14.3 | 105379069 | ENSG00000248708 |
| HGNC:53005 | LINC02145 | 5p15.31 | 401172 | ENSG00000250490 |
| HGNC:53006 | LINC02146 | 5p14.3 | 105374677 | ENSG00000249490 |
| HGNC:53007 | LINC02147 | 5q23.1 | 102467224 | ENSG00000249797 |
| HGNC:53008 | LINC02148 | 5q23.1 | 100505811 | ENSG00000250427 |
| HGNC:53010 | LINC02149 | 5p15.1 | 101929454 | ENSG00000248486 |
| HGNC:53012 | LINC02150 | 5p15.1 | 101929505 | ENSG00000248150 |
| HGNC:53013 | LINC02151 | 11q23.3 | 109729162 | ENSG00000236437 |
| HGNC:53014 | LINC02152 | 16p13.2 | 105371071 | ENSG00000261319 |
| HGNC:27823 | LINC02153 | 8p21.3 | 286114 | ENSG00000253199 |
| HGNC:53015 | LINC02154 | Xp22.2 | 109729169 | ENSG00000235385 |
| HGNC:53016 | LINC02155 | 8q12.3 | 111082988 | ENSG00000254120 |
| HGNC:53017 | LINC02156 | 12q13.11 | 111082992 | ENSG00000257906 |
| HGNC:53018 | LINC02157 | 15q26.2 | 111082990 | ENSG00000259763 |
| HGNC:53019 | LINC02158 | 3p22.1 | 729083 | ENSG00000225611 |
| HGNC:27749 | LINC02159 | 5q34 | 285629 | ENSG00000253417 |
| HGNC:53021 | LINC02160 | 5p13.3 | 105374716 | ENSG00000251443 |
| HGNC:53022 | LINC02161 | 5q14.3 | 105379076 | ENSG00000250437 |
| HGNC:53023 | LINC02162 | 5p15.33 | 105374624 | ENSG00000249830 |
| HGNC:53024 | LINC02163 | 5q21.2 | 107986389 | ENSG00000251026 |
| HGNC:53025 | LINC02164 | 16p13.3 | 105371066 | ENSG00000261811 |
| HGNC:53026 | LINC02165 | 16q21 | 101927629 | ENSG00000261014 |
| HGNC:53027 | LINC02166 | 16q24.3 | 105371416 | ENSG00000260259 |
| HGNC:53028 | LINC02167 | 16p11.1 | 400533 | ENSG00000261122 |
| HGNC:53030 | LINC02168 | 16q12.1 | 105371252 | ENSG00000261703 |
| HGNC:53031 | LINC02169 | 16q12.2 | 100996338 | ENSG00000259517 |
| HGNC:53033 | LINC02171 | 4p16.3 | 100133461 | ENSG00000250632 |
| HGNC:53034 | LINC02172 | 4q28.3 | 105377443 | ENSG00000251632 |
| HGNC:53035 | LINC02173 | 4q24 | 105377355 | ENSG00000249613 |
| HGNC:53037 | LINC02174 | 4q34.1 | 105377536 | ENSG00000249297 |
| HGNC:27550 | LINC02175 | 16p12.1 | 283887 | ENSG00000262155 |
| HGNC:53038 | LINC02176 | 16q24.1 | 105371379 | ENSG00000260340 |
| HGNC:53039 | LINC02177 | 16p13.2 | 101927009 | ENSG00000261617 |
| HGNC:53040 | LINC02178 | 16q12.1 | 105371248 | ENSG00000261092 |
| HGNC:53041 | LINC02179 | 16q12.1 | 101927228 | ENSG00000261623 |
| HGNC:53042 | LINC02180 | 16q12.1 | 102467079 | ENSG00000261749 |
| HGNC:53043 | LINC02181 | 16q24.2 | 440390 | ENSG00000232190 |
| HGNC:53044 | LINC02182 | 16q24.2 | 101928880 | ENSG00000260420 |
| HGNC:53045 | LINC02183 | 16q12.2 | 105371273 | ENSG00000283304 |
| HGNC:53046 | LINC02184 | 16p11.2 | 100505948 | ENSG00000260854 |
| HGNC:53047 | LINC02185 | 16p13.12 | 101927311 | ENSG00000262097 |
| HGNC:53048 | LINC02186 | 16p13.12 | 101927348 | ENSG00000261856 |
| HGNC:53049 | LINC02187 | 16q12.1 | 102724940 | ENSG00000263082 |
| HGNC:53050 | LINC02188 | 16q24.1 | 102724344 | ENSG00000261175 |
| HGNC:53051 | LINC02189 | 16q24.1 | 101928614 | ENSG00000260026 |
| HGNC:53052 | LINC02190 | 16p11.2 | 105371173 | ENSG00000261475 |
| HGNC:53053 | LINC02191 | 16p12.1 | 105371146 | ENSG00000261636 |
| HGNC:53054 | LINC02192 | 16q12.1 | 100507534 | ENSG00000261325 |
| HGNC:53055 | LINC02193 | 16q24.3 | 105371423 | ENSG00000260923 |
| HGNC:53057 | LINC2194 | 16p12.1 | 105371142 | ENSG00000260264 |
| HGNC:53058 | LINC02195 | 16p12.1 | 105371152 | ENSG00000236481 |
| HGNC:53062 | LINC02196 | 5p15.31 | 107986402 | ENSG00000250974 |
| HGNC:53063 | LINC02197 | 5q13.2 | 102724392 | ENSG00000250387 |
| HGNC:53064 | LINC02198 | 5q13.1 | 101928885 | ENSG00000249352 |
| HGNC:53065 | LINC02199 | 5p15.31 | 101929284 | ENSG00000250198 |
| HGNC:53066 | LINC02200 | 5q22.2 | 102467214 | ENSG00000250358 |
| HGNC:53067 | LINC02201 | 5q23.2 | 101927379 | ENSG00000251538 |
| HGNC:53068 | LINC02202 | 5q33.3 | 101927740 | ENSG00000245812 |
| HGNC:53069 | LINC02203 | 15q11.2 | 727924 | ENSG00000280709 |
| HGNC:53070 | LINC02204 | 15q23 | 101929151 | ENSG00000280639 |
| HGNC:53071 | LINC02205 | 15q23 | 105370880 | ENSG00000259473 |
| HGNC:53072 | LINC02206 | 15q22.32 | 102723481 | ENSG00000259289 |
| HGNC:53073 | LINC02207 | 15q26.2 | 101927153 | ENSG00000258476 |
| HGNC:52978 | LINC02208 | 5q23.1 | 101927280 | ENSG00000250891 |
| HGNC:27827 | LINC02209 | 8p12 | 286135 | ENSG00000253279 |
| HGNC:26327 | LINC02210 | 17q21.31 | 147081 | ENSG00000204650 |
| HGNC:53078 | LINC02211 | 5p14.1 | 105374693 | ENSG00000245662 |
| HGNC:53079 | LINC02212 | 5p15.2 | 101929412 | ENSG00000249396 |
| HGNC:53080 | LINC02213 | 5p15.2 | 389273 | ENSG00000249160 |
| HGNC:53081 | LINC02214 | 5q23.1 | 102467223 | ENSG00000251311 |
| HGNC:53082 | LINC02215 | 5q23.1 | 102467225 | ENSG00000249128 |
| HGNC:53083 | LINC02216 | 5q23.1 | 105379141 | ENSG00000249551 |
| HGNC:53084 | LINC02217 | 5p15.1 | 101929544 | ENSG00000248455 |
| HGNC:53085 | LINC02218 | 5p15.1 | 102723526 | ENSG00000249662 |
| HGNC:53086 | LINC02219 | 5q13.1 | 102467655 | ENSG00000253787 |
| HGNC:53087 | LINC02220 | 5p15.2 | 105374658 | ENSG00000248457 |
| HGNC:53090 | LINC02221 | 5p15.31 | 105374648 | ENSG00000250814 |
| HGNC:53091 | LINC02222 | 5q35.3 | 105377765 | ENSG00000248717 |
| HGNC:53092 | LINC02223 | 5p15.1 | 646241 | ENSG00000249937 |
| HGNC:53093 | LINC02224 | 5p12 | 102723839 | ENSG00000249203 |
| HGNC:53094 | LINC02225 | 5q11.2 | 101928539 | ENSG00000249584 |
| HGNC:53095 | LINC02226 | 5p15.31 | 729506 | ENSG00000245729 |
| HGNC:53096 | LINC02227 | 5q33.3 | 101927697 | ENSG00000276778 |
| HGNC:53097 | LINC02228 | 5p14.1 | 105374694 | ENSG00000251273 |
| HGNC:53098 | LINC02229 | 5q12.3 | 101928769 | ENSG00000250313 |
| HGNC:53099 | LINC02230 | 5q13.2 | 105379033 | ENSG00000251543 |
| HGNC:53100 | LINC02231 | 12q14.3 | 109729131 | ENSG00000248995 |
| HGNC:53103 | LINC02232 | 4q13.1 | 401134 | ENSG00000250125 |
| HGNC:53104 | LINC02233 | 4q32.1 | 109729132 | ENSG00000250488 |
| HGNC:53105 | LINC02234 | 5q15 | 109729164 | ENSG00000248202 |
| HGNC:53106 | LINC02235 | 8q21.13 | 109729147 | ENSG00000254689 |
| HGNC:53107 | LINC02236 | 5p15.31 | 109729133 | ENSG00000249734 |
| HGNC:53108 | LINC02237 | 8q23.3 | 105375706 | ENSG00000253434 |
| HGNC:53116 | LINC02238 | 1p31.1 | 109729166 | ENSG00000223479 |
| HGNC:27969 | LINC02239 | 5p14.1 | 340107 | ENSG00000248908 |
| HGNC:53118 | LINC02240 | 5q23.2 | 101927460 | ENSG00000260192 |
| HGNC:53126 | LINC02241 | 5p14.3 | 105374676 | ENSG00000251629 |
| HGNC:53127 | LINC02242 | 5q13.1 | 105379006 | ENSG00000249736 |
| HGNC:53129 | LINC02243 | Xq26.3 | 340581 | ENSG00000236091 |
| HGNC:53929 | LINC02244 | 15q26.3 | 105371018 | ENSG00000259590 |
| HGNC:53134 | LINC02245 | 2p14 | 400958 | ENSG00000237638 |
| HGNC:53135 | LINC02246 | 21q11.2 | 107987295 | ENSG00000281903 |
| HGNC:53140 | LINC02247 | 9q34.2 | 105376310 | ENSG00000223729 |
| HGNC:53147 | LINC02248 | 15q12 | 107984780 | ENSG00000235160 |
| HGNC:32351 | LINC02249 | 15q13.2 | 26082 | ENSG00000225930 |
| HGNC:53148 | LINC02250 | 15q11.2-q12 | 105370737 | ENSG00000235731 |
| HGNC:53149 | LINC02251 | 15q26.3 | 105371008 | ENSG00000258483 |
| HGNC:53150 | LINC02252 | 15q14 | 105370762 | ENSG00000261304 |
| HGNC:53151 | LINC02253 | 15q26.2 | 107984764 | ENSG00000259485 |
| HGNC:53152 | LINC02254 | 15q26.2 | 101927286 | ENSG00000259664 |
| HGNC:53153 | LINC02255 | 15q24.1 | 105370894 | ENSG00000277718 |
| HGNC:53157 | LINC02256 | 15q13.3 | 100996255 | ENSG00000261064 |
| HGNC:53159 | LINC02257 | 1q41 | 105372950 | ENSG00000238042 |
| HGNC:53165 | LINC02258 | 12q21.32 | 110806294 | ENSG00000257912 |
| HGNC:53172 | LINC02259 | 15q24.1 | 102723640 | ENSG00000259783 |
| HGNC:27956 | LINC02260 | 4q12 | 339978 | ENSG00000250456 |
| HGNC:53173 | LINC02261 | 4p15.2 | 101929199 | ENSG00000249699 |
| HGNC:53174 | LINC02262 | 4q26 | 105377389 | ENSG00000224932 |
| HGNC:53175 | LINC02263 | 4q26 | 105377390 | ENSG00000228358 |
| HGNC:53176 | LINC02264 | 4q26 | 105377391 | ENSG00000229565 |
| HGNC:53179 | LINC02265 | 4p14 | 101060498 | ENSG00000249241 |
| HGNC:53180 | LINC02266 | 4q31.21 | 105377466 | ENSG00000272727 |
| HGNC:53181 | LINC02267 | 4q22.3 | 105377338 | ENSG00000248510 |
| HGNC:53183 | LINC02268 | 4q34.1 | 101928509 | ENSG00000248174 |
| HGNC:53184 | LINC02269 | 4q34.1 | 101928478 | ENSG00000250708 |
| HGNC:53185 | LINC02270 | 4p15.33 | 101929019 | ENSG00000251210 |
| HGNC:53186 | LINC02271 | 4q13.1 | 105377249 | ENSG00000240152 |
| HGNC:53187 | LINC02272 | 4q32.1 | 107986322 | ENSG00000251283 |
| HGNC:53188 | LINC02273 | 4q31.3 | 100996286 | ENSG00000245954 |
| HGNC:53190 | LINC02274 | 14q24.3 | 100506498 | ENSG00000258586 |
| HGNC:53191 | LINC02275 | 4q33 | 100506085 | ENSG00000248319 |
| HGNC:53192 | LINC02276 | 4q31.21 | 105377456 | ENSG00000250141 |
| HGNC:53193 | LINC02277 | 14q21.2 | 107984027 | ENSG00000258487 |
| HGNC:53194 | LINC02278 | 4p14 | 105374411 | ENSG00000251635 |
| HGNC:53195 | LINC02279 | 14q32.13 | 107984637 | ENSG00000258933 |
| HGNC:53196 | LINC02280 | 14q32.33 | 101929634 | ENSG00000260792 |
| HGNC:53197 | LINC02281 | 14q12 | 105370423 | ENSG00000257748 |
| HGNC:53199 | LINC02282 | 14q12 | 105370424 | ENSG00000257056 |
| HGNC:53200 | LINC02283 | 4q12 | 105377656 | ENSG00000248184 |
| HGNC:53201 | LINC02284 | 14q22.3 | 102723699 | ENSG00000259719 |
| HGNC:53202 | LINC02285 | 14q32.31 | 101929422 | ENSG00000259004 |
| HGNC:53203 | LINC02286 | 14q12 | 105370414 | ENSG00000258098 |
| HGNC:53204 | LINC02287 | 14q32.12 | 101929002 | ENSG00000258499 |
| HGNC:27505 | LINC02288 | 14q24.3 | 283575 | ENSG00000246548 |
| HGNC:53205 | LINC02289 | 14q24.3 | 102724190 | ENSG00000258819 |
| HGNC:53206 | LINC02290 | 14q23.3 | 105370540 | ENSG00000258502 |
| HGNC:53207 | LINC02291 | 14q32.2 | 100129345 | ENSG00000197176 |
| HGNC:53208 | LINC02292 | 14q32.13 | 101929080 | ENSG00000258630 |
| HGNC:53209 | LINC02293 | 14q12 | 102724890 | ENSG00000257185 |
| HGNC:53210 | LINC02294 | 14q12 | 101927062 | ENSG00000257845 |
| HGNC:53211 | LINC02295 | 14q32.2 | 105370652 | ENSG00000258511 |
| HGNC:53212 | LINC02296 | 14q31.3 | 105370610 | ENSG00000258859 |
| HGNC:53214 | LINC02297 | 14q11.2 | 642426 | ENSG00000257504 |
| HGNC:53216 | LINC02298 | 14q32.33 | 102723354 | ENSG00000257556 |
| HGNC:53218 | LINC02299 | 14q32.2 | 105370646 | ENSG00000258979 |
| HGNC:53219 | LINC02300 | 14q12 | 105370422 | ENSG00000258175 |
| HGNC:53220 | LINC02301 | 14q31.1 | 101928599 | ENSG00000258743 |
| HGNC:53221 | LINC02302 | 14q21.2 | 101927351 | ENSG00000258998 |
| HGNC:53222 | LINC02303 | 14q21.2 | 105370479 | ENSG00000258616 |
| HGNC:53223 | LINC02304 | 14q32.2 | 105370648 | ENSG00000259110 |
| HGNC:53224 | LINC02305 | 14q31.2 | 102724338 | ENSG00000258532 |
| HGNC:53225 | LINC02306 | 14q12 | 107984700 | ENSG00000257986 |
| HGNC:53226 | LINC02307 | 14q21.2 | 105370471 | ENSG00000258969 |
| HGNC:53227 | LINC02308 | 14q31.1 | 100506700 | ENSG00000258675 |
| HGNC:53228 | LINC02309 | 14q31.3 | 105370607 | ENSG00000258994 |
| HGNC:53229 | LINC02310 | 14q22.1 | 105370496 | ENSG00000258808 |
| HGNC:53230 | LINC02311 | 14q31.1 | 102724294 | ENSG00000258718 |
| HGNC:53231 | LINC02312 | 14q32.2 | 100132612 | ENSG00000258869 |
| HGNC:53232 | LINC02313 | 14q12 | 105370439 | ENSG00000258474 |
| HGNC:53233 | LINC02314 | 14q32.31 | 100507277 | ENSG00000259082 |
| HGNC:53234 | LINC02315 | 14q21.1 | 644919 | ENSG00000251363 |
| HGNC:53235 | LINC02316 | 14q31.3 | 102724380 | ENSG00000258912 |
| HGNC:53236 | LINC02317 | 14q32.11 | 101930294 | ENSG00000258678 |
| HGNC:53237 | LINC02318 | 14q32.13 | 100506999 | ENSG00000258390 |
| HGNC:53238 | LINC02319 | 14q22.1 | 105370498 | ENSG00000258694 |
| HGNC:53239 | LINC02320 | 14q32.31 | 105370676 | ENSG00000258404 |
| HGNC:53240 | LINC02321 | 14q32.11 | 105370623 | ENSG00000258884 |
| HGNC:53241 | LINC02322 | 14q23.1 | 101927729 | ENSG00000258556 |
| HGNC:53242 | LINC02323 | 14q32.31 | 105370681 | ENSG00000259230 |
| HGNC:53244 | LINC02324 | 14q23.3 | 100128233 | ENSG00000255002 |
| HGNC:53245 | LINC02325 | 14q32.2 | 101929241 | ENSG00000246084 |
| HGNC:53246 | LINC02326 | 14q12 | 105370425 | ENSG00000257523 |
| HGNC:53247 | LINC02327 | 14q12 | 102724917 | ENSG00000258038 |
| HGNC:53248 | LINC02328 | 14q31.3 | 101928767 | ENSG00000258733 |
| HGNC:53249 | LINC02329 | 14q31.3 | 105370605 | ENSG00000258814 |
| HGNC:53250 | LINC02330 | 14q31.3 | 105370611 | ENSG00000258770 |
| HGNC:53251 | LINC02331 | 14q22.2 | 105370503 | ENSG00000235269 |
| HGNC:53252 | LINC02332 | 14q11.2 | 105370400 | ENSG00000259054 |
| HGNC:53253 | LINC02333 | 13q14.3 | 103191607 | ENSG00000271564 |
| HGNC:53254 | LINC02334 | 13q13.3 | 101929077 | ENSG00000274317 |
| HGNC:53255 | LINC02335 | 13q21.1 | 107984565 | ENSG00000278630 |
| HGNC:53256 | LINC02336 | 13q31.3 | 105370309 | ENSG00000271395 |
| HGNC:53257 | LINC02337 | 13q34 | 105370369 | ENSG00000215881 |
| HGNC:53258 | LINC02338 | 13q21.1 | 101926897 | ENSG00000277448 |
| HGNC:53259 | LINC02339 | 13q21.2 | 101926951 | ENSG00000279797 |
| HGNC:53260 | LINC02340 | 13q12.13-q12.2 | 105370125 | ENSG00000275294 |
| HGNC:53261 | LINC02341 | 13q14.11 | 105370177 | ENSG00000283554 |
| HGNC:53262 | LINC02342 | 13q21.33 | 105370253 | ENSG00000280580 |
| HGNC:53263 | LINC02343 | 13q13.2 | 105370158 | ENSG00000271850 |
| HGNC:53264 | LINC02344 | 13q13.1 | 105370154 | ENSG00000227911 |
| HGNC:53267 | LINC02345 | 15q14 | 101928227 | ENSG00000259225 |
| HGNC:53268 | LINC02346 | 15q12 | 100128714 | ENSG00000206187 |
| HGNC:53269 | LINC02347 | 12q24.32 | 100128554 | ENSG00000214043 |
| HGNC:53270 | LINC02348 | 15q26.3 | 101927505 | ENSG00000273585 |
| HGNC:53271 | LINC02349 | 15q22.2 | 100506530 | ENSG00000259284 |
| HGNC:53272 | LINC02350 | 12q24.32 | 105370059 | ENSG00000256927 |
| HGNC:53273 | LINC02351 | 15q26.3 | 105371011 | ENSG00000277987 |
| HGNC:53274 | LINC02352 | 15q13.3 | 102725022 | ENSG00000259448 |
| HGNC:53275 | LINC02353 | 4p15.1 | 101927363 | ENSG00000251329 |
| HGNC:53276 | LINC02354 | 12q13.11 | 107984503 | ENSG00000257488 |
| HGNC:53277 | LINC02355 | 4q31.23 | 101927849 | ENSG00000248210 |
| HGNC:53278 | LINC02356 | 12q24.12 | 105369984 | ENSG00000257595 |
| HGNC:53279 | LINC02357 | 4p15.2 | 105374540 | ENSG00000283314 |
| HGNC:53281 | LINC02358 | 4q12 | 107986226 | ENSG00000251256 |
| HGNC:53280 | LINC02359 | 12q24.32 | 101927464 | ENSG00000284848 |
| HGNC:53282 | LINC02360 | 4p15.33 | 105374484 | ENSG00000248300 |
| HGNC:53283 | LINC02361 | 12q24.33 | 100996246 | ENSG00000256576 |
| HGNC:53284 | LINC02362 | 4q35.1 | 102723766 | ENSG00000249096 |
| HGNC:53286 | LINC02363 | 4q35.1 | 728175 | ENSG00000180712 |
| HGNC:53288 | LINC02364 | 4p15.1 | 102723764 | ENSG00000250190 |
| HGNC:53285 | LINC02365 | 4q35.1 | 105377586 | ENSG00000254233 |
| HGNC:53289 | LINC02366 | 12p13.2 | 101928162 | ENSG00000256888 |
| HGNC:53290 | LINC02367 | 12p13.31 | 101930452 | ENSG00000260423 |
| HGNC:53291 | LINC02368 | 12q24.32 | 101927694 | ENSG00000256659 |
| HGNC:53292 | LINC02369 | 12q24.32 | 100996679 | ENSG00000256551 |
| HGNC:27885 | LINC02370 | 12q24.33 | 338797 | ENSG00000230294 |
| HGNC:53293 | LINC02371 | 12p13.33 | 107984539 | ENSG00000274659 |
| HGNC:53294 | LINC02372 | 12q24.32 | 440117 | ENSG00000249873 |
| HGNC:53295 | LINC02373 | 12q15 | 105369822 | ENSG00000257507 |
| HGNC:53296 | LINC02374 | 4q35.2 | 105377600 | ENSG00000249747 |
| HGNC:53297 | LINC02375 | 12q24.32 | 101927616 | ENSG00000256362 |
| HGNC:53298 | LINC02376 | 12q24.32 | 105370065 | ENSG00000256292 |
| HGNC:53300 | LINC02377 | 4q28.3 | 105377424 | ENSG00000250102 |
| HGNC:53301 | LINC02378 | 12p12.3 | 105369678 | ENSG00000256994 |
| HGNC:53302 | LINC02379 | 4q28.1 | 101927109 | ENSG00000251649 |
| HGNC:53303 | LINC02380 | 4q12 | 101928851 | ENSG00000248505 |
| HGNC:53304 | LINC02381 | 12q13.13 | 400043 | ENSG00000250742 |
| HGNC:53305 | LINC02382 | 4q33 | 100506107 | ENSG00000250968 |
| HGNC:53306 | LINC02383 | 4p13 | 105374436 | ENSG00000248143 |
| HGNC:53308 | LINC02384 | 12q15 | 100507195 | ENSG00000251301 |
| HGNC:53309 | LINC02385 | 12q23.3 | 105369948 | ENSG00000257193 |
| HGNC:53312 | LINC02386 | 12p11.22 | 105369717 | ENSG00000257756 |
| HGNC:53313 | LINC02387 | 12p11.21 | 101929027 | ENSG00000256232 |
| HGNC:53315 | LINC02388 | 12q14.1 | 101927653 | ENSG00000257259 |
| HGNC:53316 | LINC02389 | 12q14.3 | 400046 | ENSG00000255693 |
| HGNC:53317 | LINC02390 | 12p13.31 | 105369652 | ENSG00000256582 |
| HGNC:53318 | LINC02391 | 12q22 | 101930023 | ENSG00000277851 |
| HGNC:53319 | LINC02392 | 12q21.33 | 105369893 | ENSG00000258183 |
| HGNC:53320 | LINC02393 | 12q24.32 | 400087 | ENSG00000256597 |
| HGNC:53321 | LINC02394 | 12q21.1 | 105369841 | ENSG00000258332 |
| HGNC:53322 | LINC02395 | 12q13.12 | 101927292 | ENSG00000257771 |
| HGNC:27463 | LINC02396 | 12q13.12 | 283332 | ENSG00000258135 |
| HGNC:53323 | LINC02397 | 12q22 | 100507616 | ENSG00000205056 |
| HGNC:53325 | LINC02398 | 12p12.2 | 100506393 | ENSG00000256287 |
| HGNC:53326 | LINC02399 | 12q21.33 | 105369891 | ENSG00000257725 |
| HGNC:53327 | LINC02400 | 12q12 | 101927038 | ENSG00000257784 |
| HGNC:53328 | LINC02401 | 12q23.3 | 101929084 | ENSG00000257762 |
| HGNC:53329 | LINC02402 | 12q12 | 101927058 | ENSG00000257510 |
| HGNC:53330 | LINC02403 | 12q14.1 | 105369785 | ENSG00000257541 |
| HGNC:53331 | LINC02404 | 12q21.33 | 105369900 | ENSG00000257893 |
| HGNC:53333 | LINC02405 | 12q24.32 | 101927592 | ENSG00000249345 |
| HGNC:53334 | LINC02406 | 12q12 | 105369730 | ENSG00000258144 |
| HGNC:53337 | LINC02408 | 12q15 | 100507175 | ENSG00000203585 |
| HGNC:53338 | LINC02409 | 12q23.1 | 105369929 | ENSG00000257920 |
| HGNC:53339 | LINC02410 | 12q23.1 | 105369920 | ENSG00000258292 |
| HGNC:53340 | LINC02411 | 12q24.32 | 101927637 | ENSG00000256022 |
| HGNC:53341 | LINC02412 | 12q22 | 102724933 | ENSG00000258171 |
| HGNC:53342 | LINC02413 | 12q22 | 105369906 | ENSG00000257345 |
| HGNC:53343 | LINC02414 | 12q24.33 | 105370085 | ENSG00000256424 |
| HGNC:53344 | LINC02415 | 12q24.33 | 107161159 | ENSG00000248703 |
| HGNC:53345 | LINC02416 | 12q13.11 | 107984528 | ENSG00000257924 |
| HGNC:53347 | LINC02417 | 12p13.32 | 101930162 | ENSG00000257048 |
| HGNC:53348 | LINC02418 | 12q24.33 | 100190940 | ENSG00000214039 |
| HGNC:53349 | LINC02419 | 12q24.33 | 105370078 | ENSG00000256906 |
| HGNC:53350 | LINC02420 | 12q15 | 102724433 | ENSG00000256172 |
| HGNC:53351 | LINC02421 | 12q15 | 101927901 | ENSG00000255970 |
| HGNC:53352 | LINC02422 | 12p11.21 | 105369723 | ENSG00000255760 |
| HGNC:53353 | LINC02423 | 12q24.23 | 105370014 | ENSG00000256750 |
| HGNC:53354 | LINC02424 | 12q21.2 | 105369860 | ENSG00000258220 |
| HGNC:53356 | LINC02425 | 12q14.3 | 105369810 | ENSG00000256259 |
| HGNC:53357 | LINC02426 | 12q21.31 | 101928449 | ENSG00000257747 |
| HGNC:53358 | LINC02427 | 4q35.1 | 105377585 | ENSG00000271538 |
| HGNC:53359 | LINC02428 | 4q24 | 101929448 | ENSG00000248740 |
| HGNC:53360 | LINC02429 | 4q13.1 | 105377247 | ENSG00000251266 |
| HGNC:53361 | LINC02430 | 4q31.23 | 107986319 | ENSG00000250252 |
| HGNC:53362 | LINC02431 | 4q34.1 | 100506122 | ENSG00000248872 |
| HGNC:53363 | LINC02432 | 4q31.21 | 100507639 | ENSG00000248810 |
| HGNC:27959 | LINC02433 | 4q32.1 | 340017 | ENSG00000234111 |
| HGNC:53365 | LINC02434 | 4q35.2 | 105377606 | ENSG00000248370 |
| HGNC:53366 | LINC02435 | 4q28.1 | 107986311 | ENSG00000251526 |
| HGNC:53368 | LINC02436 | 4q35.1 | 101928877 | ENSG00000250754 |
| HGNC:53369 | LINC02437 | 4q35.1 | 107986333 | ENSG00000248517 |
| HGNC:53370 | LINC02438 | 4p15.31 | 107986264 | ENSG00000248238 |
| HGNC:53371 | LINC02439 | 12q24.23 | 105370016 | ENSG00000255814 |
| HGNC:53372 | LINC02440 | 12q24.23 | 105370015 | ENSG00000255618 |
| HGNC:53373 | LINC02441 | 12q24.32 | 105370070 | ENSG00000256643 |
| HGNC:53374 | LINC02442 | 12q15 | 105369815 | ENSG00000256077 |
| HGNC:53375 | LINC02443 | 12p13.32 | 101929584 | ENSG00000256115 |
| HGNC:53376 | LINC02444 | 12q21.1 | 101928137 | ENSG00000258123 |
| HGNC:53377 | LINC02445 | 12q21.1 | 105369840 | ENSG00000257750 |
| HGNC:53378 | LINC02446 | 12p13.2 | 101060038 | ENSG00000256039 |
| HGNC:53379 | LINC02447 | 4p16.1 | 730971 | ENSG00000245468 |
| HGNC:53380 | LINC02448 | 12q14.1 | 105369792 | ENSG00000257230 |
| HGNC:53381 | LINC02449 | 12p13.31 | 101927905 | ENSG00000215241 |
| HGNC:53382 | LINC02450 | 12q12 | 105369739 | ENSG00000257114 |
| HGNC:53383 | LINC02451 | 12q12 | 105369738 | ENSG00000257164 |
| HGNC:53384 | LINC02452 | 12q23.1 | 105369924 | ENSG00000283422 |
| HGNC:53392 | LINC02453 | 12q23.1 | 643770 | ENSG00000245017 |
| HGNC:53387 | LINC02454 | 12q14.3 | 105369807 | ENSG00000256268 |
| HGNC:53388 | LINC02455 | 12p13.33 | 105369597 | ENSG00000256672 |
| HGNC:53389 | LINC02456 | 12q23.2 | 105369942 | ENSG00000283052 |
| HGNC:53393 | LINC02457 | 12q24.22 | 107984439 | ENSG00000258018 |
| HGNC:53394 | LINC02458 | 12q21.33 | 728084 | ENSG00000246363 |
| HGNC:53395 | LINC02459 | 12q24.21 | 105369996 | ENSG00000257476 |
| HGNC:53396 | LINC02460 | 12q24.23 | 105370013 | ENSG00000255714 |
| HGNC:53398 | LINC02461 | 12q12 | 105369740 | ENSG00000258331 |
| HGNC:53399 | LINC02462 | 4q28.3 | 105377434 | ENSG00000251291 |
| HGNC:53400 | LINC02463 | 12q24.21 | 105370004 | ENSG00000257683 |
| HGNC:53401 | LINC02464 | 12q21.2 | 105369854 | ENSG00000257677 |
| HGNC:53403 | LINC02465 | 4q28.2 | 107986313 | ENSG00000249618 |
| HGNC:53405 | LINC02466 | 4q28.2 | 101927282 | ENSG00000246876 |
| HGNC:53404 | LINC02467 | 12q24.32 | 107984446 | ENSG00000256763 |
| HGNC:53406 | LINC02468 | 12p12.2 | 105369684 | ENSG00000256499 |
| HGNC:53408 | LINC02469 | 4q21.21 | 105377301 | ENSG00000248408 |
| HGNC:53409 | LINC02470 | 12p13.31 | 100506159 | ENSG00000225231 |
| HGNC:53410 | LINC02471 | 12q12 | 105369734 | ENSG00000223914 |
| HGNC:53411 | LINC02472 | 4p15.1 | 105374561 | ENSG00000248338 |
| HGNC:53412 | LINC02473 | 4p15.2 | 107986266 | ENSG00000261121 |
| HGNC:53417 | LINC02474 | 1q41 | 110806276 | ENSG00000228437 |
| HGNC:53418 | LINC02475 | 4p13 | 100506827 | ENSG00000251350 |
| HGNC:53419 | LINC02476 | 7q31.31 | 105375475 | ENSG00000225546 |
| HGNC:53425 | LINC02477 | 4q32.1 | 105377512 | ENSG00000249425 |
| HGNC:53446 | LINC02478 | 2q24.2 | 100505984 | ENSG00000285373 |
| HGNC:53453 | LINC02479 | 4q28.3 | 105377420 | ENSG00000251326 |
| HGNC:53454 | LINC02480 | 4q12 | 105377652 | ENSG00000251040 |
| HGNC:27958 | LINC002481 | 4p16.1 | 339988 | ENSG00000246526 |
| HGNC:53458 | LINC02482 | 4p16.1 | 105374366 | ENSG00000251580 |
| HGNC:53457 | LINC02483 | 4q21.1 | 441025 | ENSG00000251383 |
| HGNC:53459 | LINC02484 | 4p15.1 | 105374394 | ENSG00000248685 |
| HGNC:53460 | LINC02485 | 4q28.3 | 105377439 | ENSG00000248456 |
| HGNC:53466 | LINC02487 | 6q27 | 441178 | ENSG00000203688 |
| HGNC:53467 | LINC02488 | 5q14.3 | 111082994 | ENSG00000249362 |
| HGNC:53470 | LINC02489 | 11p11.2 | 101928919 | ENSG00000255007 |
| HGNC:53471 | LINC02490 | 15q21.3 | 105370822 | ENSG00000259237 |
| HGNC:53475 | LINC02491 | 4q31.21 | 105377467 | ENSG00000248686 |
| HGNC:53476 | LINC02492 | 4q35.2 | 100506272 | ENSG00000250590 |
| HGNC:53477 | LINC02493 | 4p15.32 | 101929123 | ENSG00000250819 |
| HGNC:53479 | LINC02494 | 4q13.1 | 105377671 | ENSG00000250340 |
| HGNC:27728 | LINC02495 | 4p16.1 | 285484 | ENSG00000249896 |
| HGNC:53480 | LINC02496 | 4q13.1 | 105377248 | ENSG00000249066 |
| HGNC:53482 | LINC02497 | 4p15.1 | 102723778 | ENSG00000251182 |
| HGNC:53483 | LINC02498 | 4p16.1 | 102723525 | ENSG00000283083 |
| HGNC:53484 | LINC02499 | 4q13.3 | 728040 | ENSG00000250436 |
| HGNC:53488 | LINC02500 | 4q34.3 | 101928679 | ENSG00000249460 |
| HGNC:53489 | LINC02501 | 4p15.1 | 105374565 | ENSG00000249882 |
| HGNC:53491 | LINC02502 | 4q27 | 100996694 | ENSG00000250392 |
| HGNC:53492 | LINC02503 | 4q24 | 105377349 | ENSG00000249614 |
| HGNC:53493 | LINC02504 | 4q34.1 | 101928288 | ENSG00000248339 |
| HGNC:53494 | LINC02505 | 4p14 | 105374400 | ENSG00000248215 |
| HGNC:53495 | LINC02506 | 4p15.1 | 102723828 | ENSG00000251129 |
| HGNC:53496 | LINC02507 | 4q31.23 | 105377477 | ENSG00000251688 |
| HGNC:53497 | LINC02508 | 4q35.2 | 105377610 | ENSG00000251619 |
| HGNC:53498 | LINC02509 | 4q34.3 | 105377556 | ENSG00000250263 |
| HGNC:53499 | LINC02510 | 4q28.3 | 729307 | ENSG00000250341 |
| HGNC:53500 | LINC02511 | 4q28.3 | 105377441 | ENSG00000248869 |
| HGNC:53501 | LINC02512 | 4q33 | 107986241 | ENSG00000251061 |
| HGNC:53502 | LINC02513 | 4p14 | 105374410 | ENSG00000248227 |
| HGNC:53503 | LINC02514 | 4q35.2 | 105377602 | ENSG00000250042 |
| HGNC:53504 | LINC02515 | 4q35.2 | 102723920 | ENSG00000250620 |
| HGNC:53505 | LINC02516 | 4q28.1 | 101927087 | ENSG00000261083 |
| HGNC:53506 | LINC02517 | 4p16.1 | 105374374 | ENSG00000249145 |
| HGNC:53509 | LINC02518 | 6q21 | 105377957 | ENSG00000232316 |
| HGNC:53510 | LINC02519 | 6q27 | 105378147 | ENSG00000226194 |
| HGNC:53511 | LINC02520 | 6p21.2 | 100505530 | ENSG00000204110 |
| HGNC:53560 | LINC02521 | 6p25.2 | 105374885 | ENSG00000228718 |
| HGNC:53541 | LINC02522 | 6p24.3 | 101928106 | ENSG00000231056 |
| HGNC:53542 | LINC02523 | 6q22.31 | 643623 | ENSG00000224506 |
| HGNC:53545 | LINC02525 | 6p25.2 | 100507194 | ENSG00000230269 |
| HGNC:53550 | LINC02526 | 6q21 | 105377926 | ENSG00000229654 |
| HGNC:53553 | LINC02527 | 6q21 | 105377946 | ENSG00000227012 |
| HGNC:53554 | LINC02528 | 6q23.3 | 105378020 | ENSG00000229922 |
| HGNC:53555 | LINC02529 | 6q25.3 | 102724053 | ENSG00000234777 |
| HGNC:53556 | LINC02530 | 6p24.1 | 101928309 | ENSG00000234015 |
| HGNC:53557 | LINC02531 | 6q16.1 | 107986533 | ENSG00000220908 |
| HGNC:53549 | LINC02532 | 6q21 | 100422737 | ENSG00000235142 |
| HGNC:53566 | LINC02533 | 6p25.1 | 105374895 | ENSG00000260239 |
| HGNC:53567 | LINC02534 | 6q22.1 | 105377962 | ENSG00000228777 |
| HGNC:53569 | LINC02535 | 6q14.3 | 101928820 | ENSG00000234155 |
| HGNC:53570 | LINC02536 | 6q22.33 | 105377997 | ENSG00000281248 |
| HGNC:27784 | LINC02537 | 6p21.1 | 285857 | ENSG00000283215 |
| HGNC:53571 | LINC02538 | 6q27 | 401286 | ENSG00000272549 |
| HGNC:53572 | LINC02539 | 6q23.3 | 100507406 | ENSG00000234956 |
| HGNC:53573 | LINC02540 | 6q14.1 | 105377860 | ENSG00000236635 |
| HGNC:53574 | LINC02541 | 6q21 | 101927686 | ENSG00000230943 |
| HGNC:53576 | LINC02542 | 6q14.1 | 102724168 | ENSG00000226453 |
| HGNC:53577 | LINC02543 | 6p22.3 | 101928406 | ENSG00000232947 |
| HGNC:53578 | LINC02544 | 6q27 | 101929504 | ENSG00000261039 |
| HGNC:53580 | LINC02545 | 11p15.2 | 105376561 | ENSG00000254930 |
| HGNC:53581 | LINC02546 | 11p14.1 | 105376606 | ENSG00000255117 |
| HGNC:53582 | LINC02547 | 11p15.3 | 105376554 | ENSG00000254486 |
| HGNC:53583 | LINC02548 | 11p15.3-p15.2 | 105376562 | ENSG00000255411 |
| HGNC:53584 | LINC02549 | 6q12 | 101928280 | ENSG00000226497 |
| HGNC:53585 | LINC02550 | 11q23.1 | 105369490 | ENSG00000271584 |
| HGNC:53586 | LINC02551 | 11q24.3 | 100507431 | ENSG00000254842 |
| HGNC:53587 | LINC02552 | 11q22.3 | 102723895 | ENSG00000256422 |
| HGNC:53588 | LINC02553 | 11q21 | 105369449 | ENSG00000255039 |
| HGNC:53594 | LINC02554 | 22q12.1 | 100507657 | ENSG00000226741 |
| HGNC:53593 | LINC02555 | 12q12 | 101930164 | ENSG00000260943 |
| HGNC:53595 | LINC02556 | 22q11.23 | 102724679 | ENSG00000236611 |
| HGNC:53596 | LINC02557 | 22q11.23 | 105372955 | ENSG00000225413 |
| HGNC:53597 | LINC02558 | 22q12.3 | 105372999 | ENSG00000230866 |
| HGNC:53598 | LINC02559 | 22q12.1 | 105372972 | ENSG00000236464 |
| HGNC:53600 | LINC02560 | 19q13.43 | 110806301 | ENSG00000268307 |
| HGNC:53601 | LINC02561 | 10p15.1 | 110806285 | ENSG00000224034 |
| HGNC:53602 | LINC02562 | 4q13.3 | 105377283 | ENSG00000260265 |
| HGNC:52923 | LINC02563 | 17q24.1 | 105827617 | ENSG00000263520 |
| HGNC:53604 | LINC02564 | 18p11.32 | 102724130 | ENSG00000262352 |
| HGNC:53605 | LINC02565 | 18q21.31 | 105372138 | ENSG00000267726 |
| HGNC:53609 | LINC02567 | 1p31.1 | 110806286 | ENSG00000237552 |
| HGNC:51430 | LINC02568 | 15q22.2-q22.31 | 102723344 | ENSG00000259459 |
| HGNC:39760 | LINC02569 | 6p21.33 | 111082993 | ENSG00000235781 |
| HGNC:39766 | LINC02570 | 6p21.33 | 105375014 | ENSG00000237923 |
| HGNC:53630 | LINC02571 | 6p21.33 | 105375015 | ENSG00000256166 |
| HGNC:53634 | LINC02572 | 2q21.1 | 105373615 | ENSG00000229536 |
| HGNC:53730 | LINC02573 | 21q21.1 | 111216285 | ENSG00000233236 |
| HGNC:53746 | LINC02574 | 1p35.3 | 111216282 | ENSG00000233975 |
| HGNC:53747 | LINC02575 | 21q22.3 | 111216286 | ENSG00000228709 |
| HGNC:53748 | LINC02576 | 2p14 | 102724233 | ENSG00000232613 |
| HGNC:53749 | LINC02577 | 7q22.3 | 111216280 | ENSG00000228742 |
| HGNC:53750 | LINC02578 | 9q33.1 | 111216287 | ENSG00000235201 |
| HGNC:27942 | LINC02579 | 2p14 | 339807 | ENSG00000233694 |
| HGNC:53751 | LINC02580 | 2p21 | 100506047 | ENSG00000230587 |
| HGNC:53792 | LINC02582 | 18q22.3 | 100505817 | ENSG00000261780 |
| HGNC:53812 | LINC02583 | 2p21 | 101805491 | ENSG00000187600 |
| HGNC:33275 | LINC02584 | 11q13.3 | 100009613 | ENSG00000254417 |
| HGNC:50302 | LINC02585 | 3p21.31 | 102724368 | ENSG00000228350 |
| HGNC:39958 | LINC02586 | 1p13.3 | 100873974 | ENSG00000224965 |
| HGNC:50672 | LINC02587 | 7p21.2 | 101927524 | ENSG00000229108 |
| HGNC:19827 | LINC02588 | 14q12 | 102725045 | ENSG00000257842 |
| HGNC:53859 | LINC02589 | Xq22.2 | 105373300 |  |
| HGNC:53861 | LINC02590 | 2p21 | 112441441 | ENSG00000233978 |
| HGNC:53901 | LINC02591 | 1q21.1 | 388692 | ENSG00000263590 |
| HGNC:53933 | LINC02593 | 1p36.33 | 100130417 | ENSG00000223764 |
| HGNC:53935 | LINC02594 | 17q21.31 | 105371786 | ENSG00000267440 |
| HGNC:53946 | LINC02595 | Xp11.3 | 401585 | ENSG00000231566 |
| HGNC:53948 | LINC02596 | 1p36.12 | 105376834 | ENSG00000233431 |
| HGNC:53950 | LINC02597 | 20q13.12 | 101929866 |  |
| HGNC:53954 | LINC02598 | 12p13.2 | 112588022 | ENSG00000256155 |
| HGNC:53931 | LINC02599 | 8q11.21 | 113523635 | ENSG00000233858 |
| HGNC:53177 | LINC02600 | 4p16.3 | 107986251 | ENSG00000250986 |
| HGNC:53966 | LINC02601 | Xp11.4 | 105373185 | ENSG00000223714 |
| HGNC:53968 | LINC02602 | 1q32.2 | 107985257 |  |
| HGNC:37186 | LINC02603 | 9q22.32 | 158257 | ENSG00000230262 |
| HGNC:53972 | LINC02604 | 7q11.21 | 644794 | ENSG00000273142 |
| HGNC:53974 | LINC02605 | 8q21.13 | 112935892 | ENSG00000261618 |
| HGNC:54047 | LINC02606 | 1p36.22 | 100506022 | ENSG00000284693 |
| HGNC:54049 | LINC02607 | 1p21.3 | 100996635 | ENSG00000228971 |
| HGNC:54052 | LINC02608 | 1q32.3 | 101929541 | ENSG00000226251 |
| HGNC:27140 | LINC02609 | 1p22.2 | 105378853 | ENSG00000233593 |
| HGNC:27177 | LINC02610 | 2q37.3 | 151174 | ENSG00000186235 |
| HGNC:54060 | LINC02611 | 2q11.2 | 101927070 | ENSG00000226791 |
| HGNC:54067 | LINC02612 | 2q23.3 | 101929282 | ENSG00000224048 |
| HGNC:54068 | LINC02613 | 2p22.1 | 101929596 | ENSG00000231367 |
| HGNC:54072 | LINC02614 | 3q21.2 | 101927056 | ENSG00000241288 |
| HGNC:53402 | LINC02615 | 4q28.2 | 100507487 | ENSG00000251432 |
| HGNC:54078 | LINC02616 | 4p14 | 100508631 | ENSG00000261761 |
| HGNC:54089 | LINC02617 | 12p13.2 | 113523642 | ENSG00000256288 |
| HGNC:54091 | LINC02618 | 3q23 | 646730 |  |
| HGNC:54094 | LINC02619 | 4q13.1 | 105377245 | ENSG00000249382 |
| HGNC:54097 | LINC02620 | 10q25.1 | 101927523 | ENSG00000225768 |
| HGNC:54098 | LINC02621 | 10q21.2 | 105378325 | ENSG00000234756 |
| HGNC:54099 | LINC02622 | 10q22.1 | 105378349 | ENSG00000259267 |
| HGNC:54101 | LINC02623 | 10q11.21 | 101929445 | ENSG00000234944 |
| HGNC:54103 | LINC02624 | 10q25.1 | 105378470 | ENSG00000229775 |
| HGNC:54104 | LINC02625 | 10q21.2 | 107984237 | ENSG00000233643 |
| HGNC:54105 | LINC02626 | 10q25.3 | 102724589 | ENSG00000236799 |
| HGNC:54106 | LINC02627 | 10q25.1 | 101927549 | ENSG00000229466 |
| HGNC:54107 | LINC02628 | 10p11.22 | 105376490 | ENSG00000226412 |
| HGNC:54108 | LINC02629 | 10p11.22 |  | ENSG00000223470 |
| HGNC:54110 | LINC02630 | 10p11.21 | 105376495 | ENSG00000227313 |
| HGNC:54112 | LINC02631 | 2q22.1 |  | ENSG00000237772 |
| HGNC:54114 | LINC02632 | 10q11.21 | 107984178 | ENSG00000234864 |
| HGNC:54116 | LINC02633 | 10q11.21 | 105378270 | ENSG00000224265 |
| HGNC:54117 | LINC02634 | 10p11.21 | 105376493 | ENSG00000233200 |
| HGNC:54118 | LINC02635 | 10p11.21 | 105376491 | ENSG00000283000 |
| HGNC:54119 | LINC02636 | 10q22.1 | 102723350 | ENSG00000224222 |
| HGNC:54120 | LINC02637 | 10q11.22 | 102724350 | ENSG00000272430 |
| HGNC:54122 | LINC02639 | 10p15.1 | 105376365 | ENSG00000230573 |
| HGNC:54123 | LINC02640 | 10q21.3 | 107984241 | ENSG00000233590 |
| HGNC:54125 | LINC02641 | 10q26.13 | 105378531 | ENSG00000230131 |
| HGNC:54124 | LINC02642 | 10p14 | 105376388 | ENSG00000232591 |
| HGNC:54126 | LINC02643 | 10p12.31 | 105376444 | ENSG00000230109 |
| HGNC:54127 | LINC02644 | 10p11.23 | 105376480 | ENSG00000230720 |
| HGNC:54129 | LINC02645 | 10p15.3 | 105376351 | ENSG00000234170 |
| HGNC:54130 | LINC02646 | 10q26.3 | 107984002 | ENSG00000236303 |
| HGNC:54131 | LINC02647 | 10q23.1 | 101929646 | ENSG00000223993 |
| HGNC:54132 | LINC02648 | 10p14 | 101928150 | ENSG00000225948 |
| HGNC:54134 | LINC02649 | 10p15.1 | 399715 | ENSG00000215244 |
| HGNC:54135 | LINC02650 | 10q23.1 | 105378397 | ENSG00000233945 |
| HGNC:54136 | LINC02651 | 10q22.1 | 105378346 | ENSG00000235645 |
| HGNC:54137 | LINC02652 | 10p12.1 | 105376468 | ENSG00000237128 |
| HGNC:54138 | LINC02653 | 10q23.31 | 101926942 | ENSG00000236373 |
| HGNC:54140 | LINC02654 | 10p13 | 102724039 | ENSG00000226140 |
| HGNC:54141 | LINC02655 | 10q23.1 | 105378386 | ENSG00000231082 |
| HGNC:54142 | LINC02656 | 10p15.1 | 399716 | ENSG00000212743 |
| HGNC:54143 | LINC02657 | 10p15.1 | 105376382 | ENSG00000242147 |
| HGNC:54144 | LINC02658 | 10q11.21 | 102724264 | ENSG00000234973 |
| HGNC:54145 | LINC02659 | 10q11.21 | 105378277 | ENSG00000236769 |
| HGNC:54146 | LINC02660 | 10p15.1 | 101927904 | ENSG00000226005 |
| HGNC:54147 | LINC02661 | 10q25.1 | 105378478 | ENSG00000223381 |
| HGNC:54148 | LINC02662 | 10p15.3 | 105376348 | ENSG00000231326 |
| HGNC:54149 | LINC02663 | 10p14 | 105376402 | ENSG00000228636 |
| HGNC:54150 | LINC02664 | 10p11.22 | 101929352 | ENSG00000272381 |
| HGNC:54151 | LINC02665 | 10p14 | 105376386 | ENSG00000223581 |
| HGNC:54152 | LINC02666 | 10q26.3 | 107984280 | ENSG00000283141 |
| HGNC:54153 | LINC02667 | 10q26.3 | 728327 | ENSG00000224190 |
| HGNC:54154 | LINC02668 | 10p15.2 | 105376354 | ENSG00000226762 |
| HGNC:54155 | LINC02669 | 10p15.2 | 101927880 | ENSG00000233321 |
| HGNC:54156 | LINC02670 | 10p14 | 101928298 | ENSG00000224788 |
| HGNC:54158 | LINC02671 | 10q21.3 | 101928887 | ENSG00000224714 |
| HGNC:54159 | LINC02672 | 10q21.1 | 105378309 | ENSG00000227121 |
| HGNC:54167 | LINC02673 | 10p12.1 | 101929180 | ENSG00000260151 |
| HGNC:54168 | LINC02674 | 10q26.11 | 102724627 | ENSG00000234952 |
| HGNC:54169 | LINC02675 | 10q11.22 | 112267862 | ENSG00000264404 |
| HGNC:54170 | LINC02676 | 10p14 | 105755953 | ENSG00000234752 |
| HGNC:54171 | LINC02677 | 10p15.1 | 102723629 | ENSG00000228951 |
| HGNC:54172 | LINC02678 | 10p15.1 | 105376383 | ENSG00000231483 |
| HGNC:54173 | LINC02679 | 10q22.3 | 105378385 | ENSG00000226676 |
| HGNC:54174 | LINC02680 | 10p12.1 | 105376463 | ENSG00000285737 |
| HGNC:54175 | LINC02681 | 10q24.32 | 101927419 | ENSG00000229649 |
| HGNC:53956 | LINCADL | 5q23.1 | 107986443 |  |
| HGNC:49089 | LINCMD1 | 6p12.2 | 101154644 | ENSG00000225613 |
| HGNC:27368 | LINGO1-AS1 | 15q24.3 | 253044 | ENSG00000259666 |
| HGNC:51423 | LINGO1-AS2 | 15q24.3 | 101929478 | ENSG00000259281 |
| HGNC:53170 | LINP1 | 10p14 | 108570035 | ENSG00000223784 |
| HGNC:52294 | LIPC-AS1 | 15q21.3 | 101928694 | ENSG00000259293 |
| HGNC:48589 | LIPE-AS1 | 19q13.2 | 100996307 | ENSG00000213904 |
| HGNC:53130 | LIVAR | 18q22.2 | 102724895 | ENSG00000266304 |
| HGNC:52976 | LIX1-AS1 | 5q15 | 101926893 | ENSG00000251513 |
| HGNC:41210 | LIX1L-AS1 | 1q21.1 | 105371260 | ENSG00000234222 |
| HGNC:50493 | LLPH-DT | 12q14.3 | 103625681 | ENSG00000239335 |
| HGNC:44477 | LMCD1-AS1 | 3p26.1 | 100288428 | ENSG00000227110 |
| HGNC:50469 | LMF1-AS1 | 16p13.3 | 101929387 | ENSG00000260439 |
| HGNC:40738 | LMLN-AS1 | 3q29 | 100873947 | ENSG00000232832 |
| HGNC:53089 | LMNB1-DT | 5q23.2 | 102723557 | ENSG00000251072 |
| HGNC:50277 | LMO7-AS1 | 13q22.2 | 101927155 | ENSG00000261105 |
| HGNC:49790 | LMO7DN-IT1 | 13q22.2 | 104326189 | ENSG00000223458 |
| HGNC:50913 | LNCAROD | 10q21.1 | 101928687 | ENSG00000231131 |
| HGNC:53864 | LNCARSR | 9q21.31 | 112577459 | ENSG00000233086 |
| HGNC:50656 | LNCNEF | 20p11.21 | 101929685 | ENSG00000237396 |
| HGNC:53947 | LNCOC1 | 8q24.3 | 100288181 | ENSG00000253741 |
| HGNC:53336 | LNCOG | 12q21.2 | 105369848 | ENSG00000257219 |
| HGNC:52746 | LNCPRESS1 | 7q22.1 | 101927721 | ENSG00000232301 |
| HGNC:52747 | LNCPRESS2 | 4q22.1 | 101929194 | ENSG00000249152 |
| HGNC:53790 | LNCRI | 7p22.3 | 401296 |  |
| HGNC:52753 | LNCSRLR | 3q24 | 109729161 | ENSG00000240032 |
| HGNC:52548 | LNCTAM34A | 1p36.22 | 102724571 | ENSG00000234546 |
| HGNC:40345 | LNX1-AS1 | 4q12 | 100873939 | ENSG00000250930 |
| HGNC:41450 | LNX1-AS2 | 4q12 | 100873955 | ENSG00000248494 |
| HGNC:26524 | LOH12CR2 | 12p13.2 | 503693 | ENSG00000205791 |
| HGNC:44169 | LOXL1-AS1 | 15q24.1 | 100287616 | ENSG00000261801 |
| HGNC:41221 | LPGAT1-AS1 | 1q32.3 | 102723727 | ENSG00000229258 |
| HGNC:40346 | LPP-AS1 | 3q28 | 100873917 | ENSG00000224563 |
| HGNC:27952 | LPP-AS2 | 3q27.3 | 339929 | ENSG00000270959 |
| HGNC:51694 | LRP1-AS | 12q13.3 | 105751187 | ENSG00000259125 |
| HGNC:44128 | LRP4-AS1 | 11p11.2 | 100507401 | ENSG00000247675 |
| HGNC:15571 | LRRC2-AS1 | 3p21.3 | 83598 | ENSG00000268324 |
| HGNC:43636 | LRRC3-DT | 21q22.3 | 100861510 | ENSG00000229356 |
| HGNC:1270 | LRRC3DN | 21q22.3 | 54083 |  |
| HGNC:53731 | LRRC8C-DT | 1p22.2 | 400761 | ENSG00000231999 |
| HGNC:54044 | LRRC52-AS1 | 1q23.3-q24.1 | 400794 | ENSG00000237463 |
| HGNC:40350 | LSAMP-AS1 | 3q13.31 | 101926903 | ENSG00000240922 |
| HGNC:37824 | LSINCT5 | 5p15.33 | 101234261 | ENSG00000281560 |
| HGNC:51845 | LUADT1 | 6q24.3 | 106182249 | ENSG00000196634 |
| HGNC:40992 | LUARIS | 7p13 | 100506895 | ENSG00000231638 |
| HGNC:48498 | LUCAT1 | 5q14.3 | 100505994 | ENSG00000248323 |
| HGNC:51199 | LUNAR1 | 15q26.3 | 104564224 | ENSG00000278090 |
| HGNC:49761 | LURAP1L-AS1 | 9p23 | 101929467 | ENSG00000235448 |
| HGNC:53728 | LY6E-DT | 8q24.3 | 100133669 | ENSG00000247317 |
| HGNC:26593 | LY86-AS1 | 6p25.1 | 285780 | ENSG00000216863 |
| HGNC:54054 | LYPLAL1-AS1 | 1q41 | 102723886 | ENSG00000228536 |
| HGNC:50560 | LYPLAL1-DT | 1q41 | 643723 | ENSG00000228063 |
| HGNC:52055 | LYRM4-AS1 | 6p25.1 | 100129461 |  |
| HGNC:41320 | LYST-AS1 | 1q42.3 | 100874266 | ENSG00000229463 |
| HGNC:43630 | LZTS1-AS1 | 8p21.3 | 100874051 | ENSG00000253733 |
| HGNC:41257 | MACC1-AS1 | 7p21.1 | 100874041 | ENSG00000228598 |
| HGNC:53963 | MACORIS | 10p11.22 | 101929951 | ENSG00000237797 |
| HGNC:37193 | MACROD2-AS1 | 20p12.1 | 100379174 | ENSG00000235914 |
| HGNC:16201 | MACROD2-IT1 | 20p12.1 | 140848 | ENSG00000227927 |
| HGNC:51203 | MAFA-AS1 | 8q24.3 | 104326051 | ENSG00000254338 |
| HGNC:43649 | MAFG-DT | 17q25.3 | 92659 | ENSG00000265688 |
| HGNC:51525 | MAFTRR | 16q23.2 | 102467146 | ENSG00000261390 |
| HGNC:53860 | MAGEA4-AS1 | Xq28 | 105373368 | ENSG00000229967 |
| HGNC:45093 | MAGEA8-AS1 | Xq28 | 101410537 | ENSG00000230899 |
| HGNC:40091 | MAGI1-AS1 | 3p14.1 | 100873983 | ENSG00000240175 |
| HGNC:42436 | MAGI1-IT1 | 3p14.1 | 151877 | ENSG00000272610 |
| HGNC:40860 | MAGI2-AS1 | 7q21.11 | 100874020 | ENSG00000251276 |
| HGNC:40861 | MAGI2-AS2 | 7q21.11 | 100874021 | ENSG00000226978 |
| HGNC:40862 | MAGI2-AS3 | 7q21.11 | 100505881 | ENSG00000234456 |
| HGNC:53626 | MAL2-AS1 | 8q24.12 | 105375726 | ENSG00000253972 |
| HGNC:29665 | MALAT1 | 11q13.1 | 378938 | ENSG00000251562 |
| HGNC:49009 | MALINC1 | 5q31.2 | 100505636 | ENSG00000245146 |
| HGNC:48719 | MAMDC2-AS1 | 9q21.12 | 100507244 | ENSG00000204706 |
| HGNC:48715 | MAN1B1-DT | 9q34.3 | 100289341 | ENSG00000268996 |
| HGNC:44678 | MANCR | 10p15.1 | 100216001 | ENSG00000231298 |
| HGNC:43732 | MANEA-DT | 6q16.1 | 101927288 | ENSG00000261366 |
| HGNC:54088 | MAP3K2-DT | 2q14.3 | 100506922 | ENSG00000236682 |
| HGNC:44359 | MAP3K14-AS1 | 17q21.31 | 100133991 | ENSG00000267278 |
| HGNC:27935 | MAP3K20-AS1 | 2q31.1 | 339751 | ENSG00000238133 |
| HGNC:54056 | MAP4K3-DT | 2p22.1 | 728730 | ENSG00000231312 |
| HGNC:53900 | MAPK6-DT | 15q21.2 | 112543478 | ENSG00000259438 |
| HGNC:24091 | MAPKAPK5-AS1 | 12q24.12 | 51275 | ENSG00000234608 |
| HGNC:43738 | MAPT-AS1 | 17q21.31 | 100128977 | ENSG00000264589 |
| HGNC:43741 | MAPT-IT1 | 17q21.31 | 100130148 | ENSG00000279685 |
| HGNC:40865 | MAST4-AS1 | 5q12.3 | 101928794 | ENSG00000229666 |
| HGNC:41448 | MAST4-IT1 | 5q12.3 | 100874310 | ENSG00000249057 |
| HGNC:40364 | MATN1-AS1 | 1p35.2 | 100129196 | ENSG00000186056 |
| HGNC:44584 | MBNL1-AS1 | 3q25.1 | 401093 | ENSG00000229619 |
| HGNC:40366 | MCCC1-AS1 | 3q27.1 | 106480736 | ENSG00000243368 |
| HGNC:39825 | MCF2L-AS1 | 13q34 | 100289410 | ENSG00000235280 |
| HGNC:48980 | MCHR2-AS1 | 6q16.2-q16.3 | 728012 | ENSG00000229315 |
| HGNC:16417 | MCM3AP-AS1 | 21q22.3 | 114044 | ENSG00000215424 |
| HGNC:51230 | MCM8-AS1 | 20p12.3 | 101929225 | ENSG00000278719 |
| HGNC:51655 | MCPH1-AS1 | 8p23.1 | 100507530 | ENSG00000249898 |
| HGNC:54085 | MCTP1-AS1 | 5q15 | 113523641 | ENSG00000249545 |
| HGNC:39764 | MDC1-AS1 | 6p21.33 | 106478956 | ENSG00000224328 |
| HGNC:39213 | MED4-AS1 | 13q14.2 | 100873965 | ENSG00000229111 |
| HGNC:48908 | MEF2C-AS1 | 5q14.3 | 101929423 | ENSG00000248309 |
| HGNC:53115 | MEF2C-AS2 | 5q14.3 | 109729137 | ENSG00000245864 |
| HGNC:14575 | MEG3 | 14q32.2 | 55384 | ENSG00000214548 |
| HGNC:14574 | MEG8 | 14q32.31 | 79104 | ENSG00000225746 |
| HGNC:43874 | MEG9 | 14q32.31 | 100507257 | ENSG00000223403 |
| HGNC:40370 | MEIS1-AS2 | 2p14 | 100873998 | ENSG00000230749 |
| HGNC:40369 | MEIS1-AS3 | 2p14 | 730198 | ENSG00000226819 |
| HGNC:40373 | MELTF-AS1 | 3q29 | 100507057 | ENSG00000228109 |
| HGNC:17991 | MESTIT1 | 7q32.2 | 317751 | ENSG00000272701 |
| HGNC:53367 | METTL14-DT | 4q26 | 101929741 | ENSG00000281731 |
| HGNC:27632 | MFSD4A-AS1 | 1q32.1 | 284578 |  |
| HGNC:51356 | MGAT3-AS1 | 22q13.1 | 104502417 | ENSG00000227188 |
| HGNC:53110 | MHENCR | 20q13.33 | 100505771 | ENSG00000232442 |
| HGNC:51291 | MHRT | 14q11.2 | 104564225 |  |
| HGNC:33425 | MIAT | 22q12.1 | 440823 | ENSG00000225783 |
| HGNC:50731 | MIATNB | 22q12.1 | 102724827 | ENSG00000244625 |
| HGNC:53631 | MICA-AS1 | 6p21.33 | 101929072 |  |
| HGNC:53632 | MICB-DT | 6p21.33 | 102725068 |  |
| HGNC:40932 | MID1IP1-AS1 | Xp11.4 | 100874211 | ENSG00000238123 |
| HGNC:27669 | MIF-AS1 | 22q11.23 | 284889 | ENSG00000218537 |
| HGNC:33464 | MIMT1 | 19q13.43 | 100073347 | ENSG00000268654 |
| HGNC:51653 | MINCR | 8q24.3 | 100507316 | ENSG00000253716 |
| HGNC:26393 | MIR1-1HG-AS1 | 20q13.33 | 253868 | ENSG00000174403 |
| HGNC:30049 | MIR7-3HG | 19p13.3 | 284424 | ENSG00000176840 |
| HGNC:27388 | MIR9-3HG | 15q26.1 | 254559 | ENSG00000255571 |
| HGNC:23564 | MIR17HG | 13q31.3 | 407975 | ENSG00000215417 |
| HGNC:28219 | MIR22HG | 17p13.3 | 84981 | ENSG00000186594 |
| HGNC:32018 | MIR29B2CHG | 1q32.2 | 100128537 | ENSG00000203709 |
| HGNC:37187 | MIR31HG | 9p21.3 | 554202 | ENSG00000171889 |
| HGNC:51913 | MIR34AHG | 1p36.22 | 106614088 | ENSG00000228526 |
| HGNC:1274 | MIR99AHG | 21q21.1 | 388815 | ENSG00000215386 |
| HGNC:39522 | MIR100HG | 11q24.1 | 399959 | ENSG00000255248 |
| HGNC:53821 | MIR122HG | 18q21.31 | 112441433 | ENSG00000267391 |
| HGNC:48723 | MIR124-2HG | 8q12.3 | 100130155 | ENSG00000254377 |
| HGNC:49594 | MIR133A1HG | 18q11.2 | 102723167 | ENSG00000265142 |
| HGNC:42871 | MIR137HG | 1p21.3 | 400765 | ENSG00000225206 |
| HGNC:35460 | MIR155HG | 21q21.3 | 114614 | ENSG00000234883 |
| HGNC:48659 | MIR181A1HG | 1q32.1 | 100131234 | ENSG00000229989 |
| HGNC:37188 | MIR181A2HG | 9q33.3 | 100379345 | ENSG00000224020 |
| HGNC:51945 | MIR193BHG | 16p13.12 | 100129781 | ENSG00000262454 |
| HGNC:51946 | MIR194-2HG | 11q13.1 | 105369343 | ENSG00000229719 |
| HGNC:53161 | MIR200CHG | 12p13.31 | 105369635 | ENSG00000257084 |
| HGNC:49402 | MIR202HG | 10q26.3 | 101927671 | ENSG00000166917 |
| HGNC:43562 | MIR205HG | 1q32.2 | 642587 | ENSG00000230937 |
| HGNC:39524 | MIR210HG | 11p15.5 | 100506211 | ENSG00000247095 |
| HGNC:50537 | MIR217HG | 2p16.1 | 104355290 | ENSG00000226702 |
| HGNC:49555 | MIR222HG | Xp11.3 | 104457406 | ENSG00000270069 |
| HGNC:41070 | MIR302CHG | 4q25 | 109864269 | ENSG00000249532 |
| HGNC:50346 | MIR325HG | Xq13.3-q21.1 | 101928469 |  |
| HGNC:54166 | MIR378D2HG | 8q22.1 |  | ENSG00000264448 |
| HGNC:20136 | MIR381HG | 14q32.31 | 378881 | ENSG00000258861 |
| HGNC:39523 | MIR497HG | 17p13.1 | 100506755 | ENSG00000267532 |
| HGNC:28258 | MIR503HG | Xq26.3 | 84848 | ENSG00000223749 |
| HGNC:53539 | MIR548A1HG | 6p22.3 | 105374956 | ENSG00000283408 |
| HGNC:52006 | MIR548XHG | 21q21.1 | 101927797 | ENSG00000224141 |
| HGNC:53743 | MIR570HG | 3q29 | 440993 |  |
| HGNC:53061 | MIR583HG | 5q15 | 107984114 | ENSG00000250551 |
| HGNC:23642 | MIR600HG | 9q33.3 | 81571 | ENSG00000236901 |
| HGNC:27659 | MIR646HG | 20q13.33 | 284757 | ENSG00000228340 |
| HGNC:27662 | MIR663AHG | 20p11.1 | 284801 | ENSG00000227195 |
| HGNC:49204 | MIR670HG | 11p11.2 | 100507261 | ENSG00000235661 |
| HGNC:51386 | MIR762HG | 16p11.2 | 101928736 | ENSG00000260083 |
| HGNC:44332 | MIR924HG | 18q12.2-q12.3 | 647946 |  |
| HGNC:52482 | MIR1302-2HG | 1p36.33 | 107985730 | ENSG00000243485 |
| HGNC:51555 | MIR2052HG | 8q21.11-q21.13 | 441355 | ENSG00000254349 |
| HGNC:51999 | MIR2117HG | 17q21.31 | 106660605 | ENSG00000267151 |
| HGNC:51944 | MIR3142HG | 5q33.3 | 107075116 | ENSG00000253522 |
| HGNC:52000 | MIR3150BHG | 8q22.1 | 105375650 | ENSG00000245080 |
| HGNC:50676 | MIR3663HG | 10q25.3 | 101927704 | ENSG00000234474 |
| HGNC:52001 | MIR3681HG | 2p24.3 | 100506457 | ENSG00000224184 |
| HGNC:40538 | MIR3936HG | 5q31.1 | 553103 | ENSG00000233006 |
| HGNC:52002 | MIR3945HG | 4q35.1 | 731424 | ENSG00000251230 |
| HGNC:51104 | MIR3976HG | 18p11.31 | 645355 | ENSG00000261738 |
| HGNC:27861 | MIR4290HG | 9q22.2 | 286370 | ENSG00000227555 |
| HGNC:52003 | MIR4300HG | 11q14.1 | 101928989 | ENSG00000245832 |
| HGNC:52004 | MIR4307HG | 14q12 | 101927081 | ENSG00000257612 |
| HGNC:53113 | MIR4422HG | 1p32.3 | 109729135 | ENSG00000231090 |
| HGNC:52005 | MIR4432HG | 2p16.1 | 106660609 | ENSG00000223929 |
| HGNC:35163 | MIR4435-2HG | 2q13 | 541471 | ENSG00000172965 |
| HGNC:25288 | MIR4453HG | 4q31.3 | 54553 | ENSG00000268471 |
| HGNC:49008 | MIR4458HG | 5p15.31 | 100505738 | ENSG00000247516 |
| HGNC:42773 | MIR4500HG | 13q31.2 | 642345 | ENSG00000228824 |
| HGNC:31724 | MIR4527HG | 18q21.1 | 110175910 | ENSG00000267761 |
| HGNC:27448 | MIR4697HG | 11q25 | 283174 | ENSG00000280237 |
| HGNC:53124 | MIR4713HG | 15q21.2 | 109729174 | ENSG00000259240 |
| HGNC:52007 | MIR5689HG | 6p24.3 | 106660610 | ENSG00000229401 |
| HGNC:49838 | MIR7515HG | 2p25.2 | 102800314 | ENSG00000236172 |
| HGNC:53970 | MIRLET7A1HG | 9q22.32 | 112903833 | ENSG00000269946 |
| HGNC:37189 | MIRLET7BHG | 22q13.31 | 400931 | ENSG00000197182 |
| HGNC:40106 | MIS18A-AS1 | 21q22.11 | 100874202 | ENSG00000227256 |
| HGNC:40374 | MKLN1-AS | 7q32.3 | 100506881 | ENSG00000236753 |
| HGNC:44129 | MKNK1-AS1 | 1p33 | 100507423 | ENSG00000269956 |
| HGNC:12910 | MKRN3-AS1 | 15q11-q13 | 10108 |  |
| HGNC:50686 | MKX-AS1 | 10p12.1 | 101929202 | ENSG00000230500 |
| HGNC:40963 | MLIP-AS1 | 6p12.1 | 100873951 | ENSG00000235050 |
| HGNC:41461 | MLIP-IT1 | 6p12.1 | 100874282 | ENSG00000236996 |
| HGNC:40376 | MME-AS1 | 3q25.2 | 100873918 | ENSG00000240666 |
| HGNC:53142 | MMP2-AS1 | 16q12.2 | 107984884 | ENSG00000260135 |
| HGNC:51372 | MMP25-AS1 | 16p13.3 | 100507419 | ENSG00000261971 |
| HGNC:48954 | MNX1-AS1 | 7q36.3 | 645249 | ENSG00000243479 |
| HGNC:40278 | MNX1-AS2 | 7q36.3 | 105375606 | ENSG00000235029 |
| HGNC:40377 | MORC1-AS1 | 3q13.13 | 100506506 | ENSG00000239314 |
| HGNC:26662 | MORC2-AS1 | 22q12.2 | 150291 | ENSG00000235989 |
| HGNC:27991 | MORF4L2-AS1 | Xq22.2 | 340544 | ENSG00000231154 |
| HGNC:54139 | MPP7-DT | 10p12.1 | 105376466 | ENSG00000282996 |
| HGNC:53909 | MPPED2-AS1 | 11p14.1 | 105376609 | ENSG00000254489 |
| HGNC:41263 | MPRIP-AS1 | 17p11.2 | 100874529 | ENSG00000225442 |
| HGNC:51140 | MRGPRF-AS1 | 11q13.3 | 101928200 | ENSG00000256508 |
| HGNC:26691 | MRGPRG-AS1 | 11p15.4 | 283303 | ENSG00000236301 |
| HGNC:27125 | MRPL20-AS1 | 1p36.33 | 148413 | ENSG00000224870 |
| HGNC:42812 | MRPL23-AS1 | 11p15.5 | 100133545 | ENSG00000226416 |
| HGNC:53420 | MRPS30-DT | 5p12 | 100506674 | ENSG00000251141 |
| HGNC:40681 | MRTFA-AS1 | 22q13.1 | 101927257 | ENSG00000232564 |
| HGNC:43434 | MRVI1-AS1 | 11p15.4 | 100129827 | ENSG00000177112 |
| HGNC:48724 | MSC-AS1 | 8q13.3-q21.11 | 100132891 | ENSG00000235531 |
| HGNC:50279 | MT-LIPCAR | mitochondria | 103504742 |  |
| HGNC:40242 | MTOR-AS1 | 1p36.22 | 100873935 | ENSG00000225602 |
| HGNC:40924 | MTUS2-AS1 | 13q12.3 | 100874107 | ENSG00000179141 |
| HGNC:40923 | MTUS2-AS2 | 13q12.3 | 100874106 | ENSG00000236758 |
| HGNC:53936 | MUC5B-AS1 | 11p15.5 | 112577518 | ENSG00000255177 |
| HGNC:53807 | MUC20-OT1 | 3q29 | 111753249 | ENSG00000242086 |
| HGNC:37457 | MYB-AS1 | 6q22-q23 | 100873904 | ENSG00000236703 |
| HGNC:41023 | MYCBP2-AS1 | 13q22.3 | 100874212 | ENSG00000236051 |
| HGNC:41024 | MYCBP2-AS2 | 13q22.3 | 100874213 | ENSG00000229521 |
| HGNC:32684 | MYCNUT | 2p24.3 | 103752554 | ENSG00000223850 |
| HGNC:50609 | MYHAS | 17p13.1 | 100128560 | ENSG00000272975 |
| HGNC:42440 | MYLK-AS1 | 3q21.1 | 100506826 | ENSG00000239523 |
| HGNC:40387 | MYLK-AS2 | 3q21.1 | 100873940 | ENSG00000250174 |
| HGNC:40713 | MYO3B-AS1 | 2q31.1 | 101929753 | ENSG00000231898 |
| HGNC:39913 | MYO16-AS1 | 13q33.3 | 100885782 | ENSG00000236242 |
| HGNC:39914 | MYO16-AS2 | 13q33.3 | 100874067 | ENSG00000229938 |
| HGNC:51821 | MYOSLID | 2q33.3 | 105373853 | ENSG00000229647 |
| HGNC:54063 | MYOSLID-AS1 | 2q33.3 | 101927865 |  |
| HGNC:49274 | MYT1L-AS1 | 2p25.3 | 730811 | ENSG00000225619 |
| HGNC:51271 | MZF1-AS1 | 19q13.43 | 100131691 | ENSG00000267858 |
| HGNC:25038 | N4BP2L2-IT2 | 13q13.1 | 116828 | ENSG00000281026 |
| HGNC:41016 | NAALADL2-AS1 | 3q26.3 | 100874245 | ENSG00000225552 |
| HGNC:41015 | NAALADL2-AS2 | 3q26.3 | 100874244 | ENSG00000226779 |
| HGNC:41014 | NAALADL2-AS3 | 3q26.3 | 100862679 | ENSG00000230292 |
| HGNC:41143 | NADK2-AS1 | 5p13.2 | 101056700 | ENSG00000245711 |
| HGNC:44184 | NAGPA-AS1 | 16p13.3 | 100507589 | ENSG00000267072 |
| HGNC:42743 | NALCN-AS1 | 13q32.3 | 100885778 | ENSG00000233009 |
| HGNC:51192 | NALT1 | 9q34.3 | 101928483 | ENSG00000237886 |
| HGNC:42408 | NAMA | 9q22.33 | 100996569 | ENSG00000271086 |
| HGNC:44118 | NAPA-AS1 | 19q13.32-q13.33 | 100505681 | ENSG00000268061 |
| HGNC:53622 | NARF-AS1 | 17q25.3 | 111082991 | ENSG00000266445 |
| HGNC:43651 | NARF-IT1 | 17q25.3 | 100506001 | ENSG00000266236 |
| HGNC:40744 | NAV2-AS1 | 11p15.1 | 100874015 | ENSG00000254894 |
| HGNC:40743 | NAV2-AS2 | 11p15.1 | 100874014 | ENSG00000254453 |
| HGNC:40742 | NAV2-AS3 | 11p15.1 | 100874013 | ENSG00000254542 |
| HGNC:40741 | NAV2-AS4 | 11p15.1 | 399876 | ENSG00000254622 |
| HGNC:40740 | NAV2-AS5 | 11p15.1 | 100874012 | ENSG00000255043 |
| HGNC:41416 | NAV2-IT1 | 11p15.1 | 100874305 | ENSG00000255270 |
| HGNC:49075 | NBAT1 | 6p22.3 | 729177 | ENSG00000260455 |
| HGNC:20691 | NBR2 | 17q21.31 | 10230 | ENSG00000198496 |
| HGNC:48675 | NCAM1-AS1 | 11q23.2 | 100288346 | ENSG00000227487 |
| HGNC:40392 | NCBP2-AS1 | 3q29 | 100874001 | ENSG00000225578 |
| HGNC:40393 | NCF4-AS1 | 22q12.3 | 107985578 | ENSG00000183822 |
| HGNC:49645 | NCK1-DT | 3q22.3 | 101927597 | ENSG00000239213 |
| HGNC:41246 | NCKAP5-AS1 | 2q21.2 | 101928185 | ENSG00000233729 |
| HGNC:54065 | NCKAP5-AS2 | 2q21.2 | 101928161 | ENSG00000226953 |
| HGNC:41497 | NCKAP5-IT1 | 2q21.2 | 100874346 | ENSG00000232474 |
| HGNC:40954 | NCOA7-AS1 | 6q22.32 | 104355145 | ENSG00000232131 |
| HGNC:37153 | NCRUPAR | 5q13.3 | 100302746 |  |
| HGNC:40844 | NDFIP2-AS1 | 13q31.1 | 100874208 | ENSG00000232132 |
| HGNC:40395 | NDP-AS1 | Xp11.3 | 100873919 | ENSG00000236276 |
| HGNC:52899 | NDST1-AS1 | 5q33.1 | 102546298 | ENSG00000254333 |
| HGNC:45273 | NDUFA6-DT | 22q13.2 | 100132273 | ENSG00000237037 |
| HGNC:40396 | NDUFB2-AS1 | 7q34 | 100134713 | ENSG00000240889 |
| HGNC:50826 | NDUFV2-AS1 | 18p11.22 | 101927275 | ENSG00000266053 |
| HGNC:30815 | NEAT1 | 11q13.1 | 283131 | ENSG00000245532 |
| HGNC:44899 | NEBL-AS1 | 10p12.31 | 100128511 | ENSG00000231920 |
| HGNC:40813 | NECTIN3-AS1 | 3q13.13 | 100506555 | ENSG00000242242 |
| HGNC:41432 | NEGR1-IT1 | 1p31.1 | 100852409 | ENSG00000228853 |
| HGNC:51220 | NEURL1-AS1 | 10q24.33 | 102724341 | ENSG00000235470 |
| HGNC:31983 | NEXN-AS1 | 1p31.1 | 374987 | ENSG00000235927 |
| HGNC:40402 | NFIA-AS1 | 1p31.3 | 645030 | ENSG00000237853 |
| HGNC:40401 | NFIA-AS2 | 1p31.3 | 100996570 | ENSG00000237928 |
| HGNC:49451 | NFYC-AS1 | 1p34.2 | 100130557 | ENSG00000272145 |
| HGNC:53922 | NGF-AS1 | 1p13.2 | 112840934 | ENSG00000228035 |
| HGNC:40403 | NHS-AS1 | Xp22.13 | 100873920 | ENSG00000230020 |
| HGNC:27385 | NIFK-AS1 | 2q14.3 | 254128 | ENSG00000236859 |
| HGNC:51293 | NIPBL-DT | 5p13.2 | 646719 | ENSG00000285967 |
| HGNC:48595 | NKAIN3-IT1 | 8q12.3 | 643763 | ENSG00000274956 |
| HGNC:51599 | NKILA | 20q13.31 | 105416157 | ENSG00000278709 |
| HGNC:40585 | NKX2-1-AS1 | 14q13.3 | 100506237 | ENSG00000253563 |
| HGNC:37154 | NKX2-2-AS1 | 20p11.22 | 100874189 | ENSG00000258197 |
| HGNC:40676 | NLGN1-AS1 | 3q26.31 | 100874010 | ENSG00000228213 |
| HGNC:38793 | NLGN4Y-AS1 | Yq11.221 | 100874056 | ENSG00000228787 |
| HGNC:40406 | NMBR-AS1 | 6q24.1 | 111216274 | ENSG00000236822 |
| HGNC:49005 | NNT-AS1 | 5p12 | 100652772 | ENSG00000248092 |
| HGNC:44310 | NOL4L-DT | 20q11.21 | 149950 | ENSG00000204393 |
| HGNC:20205 | NOP14-AS1 | 4p16.3 | 317648 | ENSG00000249673 |
| HGNC:51587 | NOP53-AS1 | 19q13.33 | 106144593 | ENSG00000269656 |
| HGNC:44311 | NORAD | 20q11.23 | 647979 | ENSG00000260032 |
| HGNC:24129 | NPHP3-AS1 | 3q22.1 | 348808 | ENSG00000248724 |
| HGNC:37635 | NPPA-AS1 | 1p36.21 | 100379251 | ENSG00000242349 |
| HGNC:22128 | NPSR1-AS1 | 7p14.3 | 404744 | ENSG00000197085 |
| HGNC:45091 | NPTN-IT1 | 15q24.1 | 101241892 | ENSG00000281183 |
| HGNC:48622 | NR2F1-AS1 | 5q15 | 441094 | ENSG00000237187 |
| HGNC:44222 | NR2F2-AS1 | 15q26.2 | 644192 | ENSG00000247809 |
| HGNC:48588 | NRAV | 12q24.31 | 100506668 | ENSG00000248008 |
| HGNC:40780 | NREP-AS1 | 5q22.1 | 100873948 | ENSG00000250095 |
| HGNC:43633 | NRG1-IT1 | 8p12 | 100856811 | ENSG00000253974 |
| HGNC:43635 | NRG1-IT3 | 8p12 | 100874286 | ENSG00000254049 |
| HGNC:31429 | NRG3-AS1 | 10q23.1 | 101929590 | ENSG00000225738 |
| HGNC:51269 | NRIR | 2p25.2 | 104326052 | ENSG00000225964 |
| HGNC:37079 | NRON | 9q33.3 | 641373 | ENSG00000253079 |
| HGNC:51222 | NRSN2-AS1 | 20p13 | 100507459 | ENSG00000225377 |
| HGNC:51368 | NSMCE1-DT | 16p12.1 | 400512 | ENSG00000245888 |
| HGNC:32293 | NTM-AS1 | 11q25 | 101929637 | ENSG00000224795 |
| HGNC:41437 | NTM-IT | 11q25 | 100874281 | ENSG00000238262 |
| HGNC:27532 | NTRK3-AS1 | 15q25.3 | 283738 | ENSG00000260305 |
| HGNC:40419 | NUCB1-AS1 | 19q13.33 | 100874085 | ENSG00000235191 |
| HGNC:50502 | NUP50-DT | 22q13.31 | 100506714 | ENSG00000226328 |
| HGNC:45161 | NUTM2A-AS1 | 10q23.2 | 728190 | ENSG00000223482 |
| HGNC:51204 | NUTM2B-AS1 | 10q22.3 | 101060691 | ENSG00000225484 |
| HGNC:32047 | OBSCN-AS1 | 1q42.13 | 574407 | ENSG00000162913 |
| HGNC:40751 | OCIAD1-AS1 | 4p11 | 100861517 | ENSG00000248256 |
| HGNC:54070 | ODC1-DT | 2p25.1 | 101929715 | ENSG00000257135 |
| HGNC:49461 | ODF2-AS1 | 9q34.11 | 107080620 | ENSG00000225951 |
| HGNC:40724 | OGFR-AS1 | 20q13.33 | 101409261 | ENSG00000229873 |
| HGNC:43563 | OIP5-AS1 | 15q15.1 | 729082 | ENSG00000247556 |
| HGNC:28060 | OLMALINC | 10q24.31 | 90271 | ENSG00000235823 |
| HGNC:39192 | OOEP-AS1 | 6q13 | 106478938 | ENSG00000231332 |
| HGNC:40421 | OPA1-AS1 | 3q29 | 100873941 | ENSG00000224855 |
| HGNC:41366 | OPCML-IT1 | 11q25 | 100874333 | ENSG00000254896 |
| HGNC:41365 | OPCML-IT2 | 11q25 | 100874332 | ENSG00000255371 |
| HGNC:49168 | OR2A1-AS1 | 7q35 | 101928492 | ENSG00000244479 |
| HGNC:40767 | OSBPL10-AS1 | 3p23 | 100874206 | ENSG00000232490 |
| HGNC:48585 | OSER1-DT | 20q13.12 | 100505783 | ENSG00000223891 |
| HGNC:41009 | OSGEPL1-AS1 | 2q32.2 | 101409258 | ENSG00000253559 |
| HGNC:50296 | OSMR-AS1 | 5p13.1 | 101929768 | ENSG00000249740 |
| HGNC:43666 | OSTM1-AS1 | 6q21 | 100287366 | ENSG00000225174 |
| HGNC:41250 | OSTN-AS1 | 3q28 | 106480738 | ENSG00000233308 |
| HGNC:50466 | OTUD6B-AS1 | 8q21.3 | 100506365 | ENSG00000253738 |
| HGNC:43906 | OTX2-AS1 | 14q22.3 | 100309464 | ENSG00000248550 |
| HGNC:49422 | OVAAL | 1q25.3 | 148756 | ENSG00000236719 |
| HGNC:44484 | OVCH1-AS1 | 12p11.22 | 101055625 | ENSG00000257599 |
| HGNC:49319 | OVOL1-AS1 | 11q13.1 | 101927828 | ENSG00000255120 |
| HGNC:40423 | OXCT1-AS1 | 5p13.1 | 100874002 | ENSG00000248668 |
| HGNC:40886 | P3H2-AS1 | 3q28 | 101929152 | ENSG00000225764 |
| HGNC:43560 | P4HA2-AS1 | 5q31.1 | 100861518 | ENSG00000237714 |
| HGNC:53160 | P4HA3-AS1 | 11q13.4 | 101928580 | ENSG00000246211 |
| HGNC:50345 | PABPC1L2B-AS1 | Xq13.1-q13.2 | 101928345 | ENSG00000226725 |
| HGNC:40424 | PABPC4-AS1 | 1p34.3 | 101929516 | ENSG00000228060 |
| HGNC:31845 | PABPC5-AS1 | Xq21.31 | 102724167 | ENSG00000234161 |
| HGNC:50552 | PACERR | 1q31.1 | 103752588 | ENSG00000273129 |
| HGNC:27772 | PACRG-AS1 | 6q26 | 285796 | ENSG00000281692 |
| HGNC:40871 | PACRG-AS2 | 6q26 | 101929239 | ENSG00000225437 |
| HGNC:52053 | PACRG-AS3 | 6q26 | 729658 | ENSG00000225683 |
| HGNC:39932 | PAN3-AS1 | 13q12.2 | 100288730 | ENSG00000261485 |
| HGNC:52282 | PANCR | 4q25 | 110231149 | ENSG00000250103 |
| HGNC:44048 | PANDAR | 6p21.2 | 101154753 | ENSG00000281450 |
| HGNC:49513 | PANTR1 | 2q12.1 | 100506421 | ENSG00000233639 |
| HGNC:35152 | PAPPA-AS1 | 9q33.2 | 493913 | ENSG00000256040 |
| HGNC:35160 | PAPPA-AS2 | 9q33.1 | 103611155 | ENSG00000226604 |
| HGNC:50861 | PAQR9-AS1 | 3q23 | 101927832 | ENSG00000241570 |
| HGNC:53772 | PARAL1 | 20p12.2 | 101929371 | ENSG00000243961 |
| HGNC:44964 | PARD3-AS1 | 10p11.21 | 100505601 | ENSG00000226386 |
| HGNC:44109 | PARD6G-AS1 | 18q23 | 100130522 | ENSG00000267270 |
| HGNC:17263 | PART1 | 5q12.1 | 25859 | ENSG00000152931 |
| HGNC:50886 | PARTICL | 2p11.2 | 100630918 |  |
| HGNC:49670 | PAUPAR | 11p13 | 103157000 | ENSG00000281880 |
| HGNC:53448 | PAX6-AS1 | 11p13 | 440034 |  |
| HGNC:49271 | PAX8-AS1 | 2q14.1 | 654433 | ENSG00000189223 |
| HGNC:39603 | PAXBP1-AS1 | 21q22.11 | 100506215 | ENSG00000238197 |
| HGNC:27328 | PAXIP1-AS1 | 7q36.2 | 202781 | ENSG00000273344 |
| HGNC:48958 | PAXIP1-AS2 | 7q36.2 | 100132707 | ENSG00000214106 |
| HGNC:8637 | PCA3 | 9q21.2 | 50652 | ENSG00000225937 |
| HGNC:43022 | PCAT1 | 8q24.21 | 100750225 | ENSG00000253438 |
| HGNC:45089 | PCAT2 | 8q24.21 | 103164619 | ENSG00000253264 |
| HGNC:24853 | PCAT4 | 4q21.21 | 118425 | ENSG00000251321 |
| HGNC:48665 | PCAT5 | 10p11.21 | 102578074 | ENSG00000280719 |
| HGNC:43714 | PCAT6 | 1q32.1 | 100506696 | ENSG00000228288 |
| HGNC:48824 | PCAT7 | 9q22.32 | 101928099 | ENSG00000231806 |
| HGNC:48977 | PCAT14 | 22q11.23 | 101978785 | ENSG00000280623 |
| HGNC:49211 | PCAT18 | 18q11.2 | 728606 | ENSG00000265369 |
| HGNC:49593 | PCAT19 | 19q13.2 | 100505495 | ENSG00000267107 |
| HGNC:50895 | PCAT29 | 15q23 | 104472713 |  |
| HGNC:42948 | PCBP1-AS1 | 2p13.3 | 400960 | ENSG00000179818 |
| HGNC:49150 | PCBP2-OT1 | 12q13.13 | 102157401 | ENSG00000282977 |
| HGNC:39901 | PCCA-AS1 | 13q32.3 | 100885777 | ENSG00000234650 |
| HGNC:39897 | PCDH9-AS1 | 13q21.32 | 100874065 | ENSG00000234527 |
| HGNC:39896 | PCDH9-AS2 | 13q21.32 | 100874064 | ENSG00000228842 |
| HGNC:40427 | PCDH9-AS3 | 13q21.32 | 100874086 | ENSG00000225263 |
| HGNC:40428 | PCDH9-AS4 | 13q21.32 | 100874087 | ENSG00000233840 |
| HGNC:44166 | PCED1B-AS1 | 12q13.11 | 100233209 | ENSG00000247774 |
| HGNC:52263 | PCF11-AS1 | 11q14.1 | 106736475 | ENSG00000269939 |
| HGNC:30145 | PCGEM1 | 2q32.3 | 64002 | ENSG00000227418 |
| HGNC:37184 | PCNA-AS1 | 20p12.3 | 100302739 |  |
| HGNC:40430 | PCOLCE-AS1 | 7q22.1 | 100129845 | ENSG00000224729 |
| HGNC:51448 | PCSK6-AS1 | 15q26.3 | 105371027 | ENSG00000259764 |
| HGNC:40431 | PCYT1B-AS1 | Xp22.11 | 100874088 | ENSG00000236836 |
| HGNC:27425 | PDCD4-AS1 | 10q25.2 | 282997 | ENSG00000203497 |
| HGNC:53462 | PDYN-AS1 | 20p13 | 727993 | ENSG00000233896 |
| HGNC:40814 | PDZRN3-AS1 | 3p13 | 101927249 | ENSG00000239677 |
| HGNC:35127 | PEG3-AS1 | 19q13.43 | 100169890 |  |
| HGNC:19969 | PEG13 | 8q24.3 | 359809 | ENSG00000282164 |
| HGNC:41251 | PEX5L-AS1 | 3q26.33 | 100874040 | ENSG00000243799 |
| HGNC:41252 | PEX5L-AS2 | 3q26.33 | 101928790 | ENSG00000244302 |
| HGNC:44181 | PGM5-AS1 | 9q21.11 | 572558 | ENSG00000224958 |
| HGNC:51194 | PGM5P3-AS1 | 9p24.3 | 101929127 | ENSG00000277631 |
| HGNC:51195 | PGM5P4-AS1 | 2q14.1 | 103344932 | ENSG00000231943 |
| HGNC:52650 | PGR-AS1 | 11q22.1 | 101054525 | ENSG00000282728 |
| HGNC:40943 | PHACTR2-AS1 | 6q24.2 | 285740 | ENSG00000235740 |
| HGNC:40445 | PHEX-AS1 | Xp22.11 | 100873942 | ENSG00000224204 |
| HGNC:40446 | PHKA1-AS1 | Xq13.1 | 101928259 | ENSG00000231944 |
| HGNC:44110 | PHKA2-AS1 | Xp22.13 | 100132163 | ENSG00000237836 |
| HGNC:27576 | PICART1 | 17q21.33 | 284080 | ENSG00000246640 |
| HGNC:19725 | PICSAR | 21q22.3 | 378825 | ENSG00000275874 |
| HGNC:54080 | PIGY-DT | 4q22.1 | 101929134 | ENSG00000285122 |
| HGNC:32346 | PIK3CD-AS1 | 1p36.22 | 644997 | ENSG00000179840 |
| HGNC:51334 | PIK3CD-AS2 | 1p36.22 | 101929074 | ENSG00000231789 |
| HGNC:41072 | PIK3IP1-AS1 | 22q12.2 | 101929760 | ENSG00000228839 |
| HGNC:53590 | PINCR | Xp11.3 | 101927501 | ENSG00000224294 |
| HGNC:38872 | PINK1-AS | 1p36.12 | 100861548 | ENSG00000117242 |
| HGNC:16671 | PISRT1 | 3q23 | 140464 | ENSG00000281473 |
| HGNC:44116 | PITPNA-AS1 | 17p13.3 | 100306951 | ENSG00000236618 |
| HGNC:53391 | PITPNM2-AS1 | 12q24.31 | 100507091 | ENSG00000251497 |
| HGNC:44675 | PITRM1-AS1 | 10p15.2 | 100507034 | ENSG00000237399 |
| HGNC:51659 | PKIA-AS1 | 8q21.13 | 101927003 | ENSG00000254266 |
| HGNC:50597 | PKN2-AS1 | 1p22.2 | 101927891 | ENSG00000237505 |
| HGNC:50690 | PKNOX2-AS1 | 11q24.2 | 103695364 | ENSG00000254880 |
| HGNC:52580 | PKP4-AS1 | 2q24.1 | 100129029 | ENSG00000204380 |
| HGNC:51585 | PLA2G4C-AS1 | 19q13.33 | 106144526 | ENSG00000269420 |
| HGNC:51419 | PLA2G4E-AS1 | 15q15.1 | 101928388 | ENSG00000246740 |
| HGNC:14616 | PLAC4 | 21q22.2 | 191585 | ENSG00000280109 |
| HGNC:51143 | PLBD1-AS1 | 12p13.1-p12.3 | 101928290 | ENSG00000256751 |
| HGNC:41414 | PLCB1-IT1 | 20p12.3 | 100874337 | ENSG00000225479 |
| HGNC:43662 | PLCB2-AS1 | 15q15.1 | 100874186 | ENSG00000259307 |
| HGNC:45193 | PLCE1-AS1 | 10q23.33 | 100128054 | ENSG00000268894 |
| HGNC:51206 | PLCE1-AS2 | 10q23.33 | 101927049 | ENSG00000232913 |
| HGNC:40450 | PLCG1-AS1 | 20q12 | 101927117 | ENSG00000226648 |
| HGNC:41231 | PLCH1-AS1 | 3q25.31 | 100874035 | ENSG00000239508 |
| HGNC:41232 | PLCH1-AS2 | 3q25.31 | 100874036 | ENSG00000242925 |
| HGNC:40449 | PLCL2-AS1 | 3p24.3 | 100874003 | ENSG00000226441 |
| HGNC:41145 | PLCXD2-AS1 | 3q13.2 | 100874115 | ENSG00000240766 |
| HGNC:40451 | PLS1-AS1 | 3q23 | 100873943 | ENSG00000239641 |
| HGNC:50343 | PLS3-AS1 | Xq23 | 101927352 | ENSG00000271826 |
| HGNC:40907 | PLSCR5-AS1 | 3q24 | 100874104 | ENSG00000241457 |
| HGNC:43698 | PLUT | 13q12.2 | 100861550 | ENSG00000247381 |
| HGNC:52949 | POC1B-AS1 | 12q21.33 | 109729146 | ENSG00000270344 |
| HGNC:40459 | POLH-AS1 | 6p21.1 | 111216283 | ENSG00000203362 |
| HGNC:49459 | POT1-AS1 | 7q31.33 | 401398 | ENSG00000224897 |
| HGNC:40058 | POTEH-AS1 | 22q11.1 | 100852406 | ENSG00000236666 |
| HGNC:40979 | POU6F2-AS1 | 7p14.1 | 100861520 | ENSG00000224122 |
| HGNC:21887 | POU6F2-AS2 | 7p14.1 | 100689074 | ENSG00000233854 |
| HGNC:40463 | PPEF1-AS1 | Xp22.13 | 100874004 | ENSG00000237221 |
| HGNC:53397 | PPFIA2-AS1 | 12q21.31 | 102724663 | ENSG00000257467 |
| HGNC:54093 | PPM1K-DT | 4q22.1 | 105369192 | ENSG00000246375 |
| HGNC:51903 | PPP1R12A-AS1 | 12q21.31 | 105369865 | ENSG00000257557 |
| HGNC:48717 | PPP1R26-AS1 | 9q34.3 | 100506599 | ENSG00000225361 |
| HGNC:42984 | PPP2R2B-IT1 | 5q32 | 100874361 | ENSG00000249553 |
| HGNC:50750 | PPP3CB-AS1 | 10q22.2 | 101929145 | ENSG00000221817 |
| HGNC:51112 | PPP4R1-AS1 | 18p11.22 | 101927323 | ENSG00000263627 |
| HGNC:52646 | PRAL | 17p13.1 | 109245082 | ENSG00000279296 |
| HGNC:48587 | PRC1-AS1 | 15q26.1 | 100507118 | ENSG00000258725 |
| HGNC:40916 | PRICKLE2-AS1 | 3p14.1 | 100652759 | ENSG00000241572 |
| HGNC:40917 | PRICKLE2-AS2 | 3p14.1 | 100874242 | ENSG00000241101 |
| HGNC:40918 | PRICKLE2-AS3 | 3p14.1 | 100874243 | ENSG00000226017 |
| HGNC:34235 | PRINS | 10p12.1 | 100169750 |  |
| HGNC:40468 | PRKAG2-AS1 | 7q36.1 | 100505483 | ENSG00000239911 |
| HGNC:40471 | PRKAR2A-AS1 | 3p21.31 | 100506637 | ENSG00000224424 |
| HGNC:51347 | PRKCA-AS1 | 17q24.2 | 101928001 | ENSG00000264630 |
| HGNC:44689 | PRKCQ-AS1 | 10p14 | 439949 | ENSG00000237943 |
| HGNC:40477 | PRKCZ-AS1 | 1p36.33 | 100506504 | ENSG00000182873 |
| HGNC:45029 | PRKG1-AS1 | 10q21.1 | 100506939 | ENSG00000236671 |
| HGNC:54059 | PRKRA-AS1 | 2q31.2 | 101927027 | ENSG00000223960 |
| HGNC:40479 | PRKX-AS1 | Xp22.33 | 100873944 | ENSG00000236188 |
| HGNC:40533 | PRMT5-AS1 | 14q11.2 | 100505758 | ENSG00000237054 |
| HGNC:48942 | PRNCR1 | 8q24.21 | 101867536 | ENSG00000282961 |
| HGNC:18046 | PRNT | 20p13 | 149830 | ENSG00000180259 |
| HGNC:27343 | PROSER2-AS1 | 10p14 | 219731 | ENSG00000225778 |
| HGNC:43656 | PROX1-AS1 | 1q32.3 | 100505832 | ENSG00000230461 |
| HGNC:27961 | PRR7-AS1 | 5q35.3 | 340037 | ENSG00000246334 |
| HGNC:51822 | PRR29-AS1 | 17q23.3 | 400612 | ENSG00000264954 |
| HGNC:25606 | PRR34 | 22q13.31 | 55267 | ENSG00000182257 |
| HGNC:50499 | PRR34-AS1 | 22q13.31 | 150381 | ENSG00000241990 |
| HGNC:41151 | PRRT3-AS1 | 3p25.3 | 100874032 | ENSG00000230082 |
| HGNC:50684 | PRRX2-AS1 | 9q34.11 | 101929437 | ENSG00000236024 |
| HGNC:52765 | PSD2-AS1 | 5q31.2 | 101929696 | ENSG00000249131 |
| HGNC:52550 | PSG8-AS1 | 19q13.2 | 100289650 | ENSG00000225877 |
| HGNC:26445 | PSMA3-AS1 | 14q23.1 | 379025 | ENSG00000257621 |
| HGNC:39758 | PSMB8-AS1 | 6p21.32 | 100507463 | ENSG00000204261 |
| HGNC:40480 | PSMD6-AS1 | 3p14.1 | 109729140 | ENSG00000243410 |
| HGNC:44125 | PSMD6-AS2 | 3p14.1 | 100507062 | ENSG00000239653 |
| HGNC:22230 | PSMG3-AS1 | 7p22.3 | 114796 | ENSG00000230487 |
| HGNC:17203 | PSORS1C3 | 6p21.33 | 100130889 | ENSG00000204528 |
| HGNC:52951 | PSPC1-AS2 | 13q12.11 | 109729130 | ENSG00000226352 |
| HGNC:37703 | PTCHD1-AS | Xp22.11 | 100873065 | ENSG00000233067 |
| HGNC:37127 | PTCSC1 | 8q24 | 100302522 |  |
| HGNC:44086 | PTCSC2 | 9q22.33 | 101928337 | ENSG00000236130 |
| HGNC:43959 | PTCSC3 | 14q13.3 | 100886964 | ENSG00000259104 |
| HGNC:48773 | PTENP1-AS | 9p13.3 | 101243555 | ENSG00000281128 |
| HGNC:48711 | PTGES2-AS1 | 9q34.11 | 389791 |  |
| HGNC:44174 | PTOV1-AS1 | 19q13.33 | 100506033 | ENSG00000268006 |
| HGNC:51284 | PTOV1-AS2 | 19q13.33 | 101928378 | ENSG00000269352 |
| HGNC:49753 | PTPRD-AS1 | 9p24.1 | 101929407 | ENSG00000225706 |
| HGNC:49754 | PTPRD-AS2 | 9p23 | 101929428 | ENSG00000226717 |
| HGNC:44638 | PTPRG-AS1 | 3p14.2 | 100506994 | ENSG00000241472 |
| HGNC:50634 | PTPRJ-AS1 | 11p11.2 | 104326192 | ENSG00000254879 |
| HGNC:48995 | PURPL | 5p14.1 | 643401 | ENSG00000250337 |
| HGNC:9709 | PVT1 | 8q24.21 | 5820 | ENSG00000249859 |
| HGNC:30089 | PWAR1 | 15q11.2 | 145624 | ENSG00000279050 |
| HGNC:29998 | PWAR4 | 15q11.2 | 347745 |  |
| HGNC:30090 | PWAR5 | 15q11.2 | 8123 | ENSG00000279192 |
| HGNC:49129 | PWAR6 | 15q11.2 | 100506965 | ENSG00000257151 |
| HGNC:30001 | PWARSN | 15q11.2 | 347746 |  |
| HGNC:33235 | PWRN1 | 15q11.2 | 791114 | ENSG00000259905 |
| HGNC:33236 | PWRN2 | 15q11.2 | 791115 | ENSG00000260551 |
| HGNC:49131 | PWRN3 | 15q11.2 | 101928840 | ENSG00000260760 |
| HGNC:49130 | PWRN4 | 15q11.2 | 105370731 | ENSG00000260232 |
| HGNC:44123 | PXN-AS1 | 12q24.23 | 100506649 | ENSG00000255857 |
| HGNC:45036 | PYCARD-AS1 | 16p11.2 | 100652740 | ENSG00000261359 |
| HGNC:49278 | RAB6C-AS1 | 2q21.1 | 100131320 | ENSG00000225449 |
| HGNC:44178 | RAB11B-AS1 | 19p13.2 | 100507567 | ENSG00000269386 |
| HGNC:48672 | RAB30-AS1 | 11q14.1 | 100506233 | ENSG00000246067 |
| HGNC:41471 | RABGAP1L-IT1 | 1q25.1 | 106480742 | ENSG00000223525 |
| HGNC:32158 | RAD21-AS1 | 8q24.11 | 644660 | ENSG00000253327 |
| HGNC:48621 | RAD51-AS1 | 15q15.1 | 100505648 | ENSG00000245849 |
| HGNC:48994 | RAET1E-AS1 | 6q25.1 | 100652739 | ENSG00000223701 |
| HGNC:40496 | RAI1-AS1 | 17p11.2 | 100861516 | ENSG00000237328 |
| HGNC:50743 | RALY-AS1 | 20q11.22 | 101926888 | ENSG00000285230 |
| HGNC:44358 | RAMP2-AS1 | 17q21.2 | 100190938 | ENSG00000197291 |
| HGNC:40957 | RAP2C-AS1 | Xq26.2 | 101928578 | ENSG00000232160 |
| HGNC:28081 | RAPGEF4-AS1 | 2q31.1 | 91149 | ENSG00000228016 |
| HGNC:49577 | RARA-AS1 | 17q21.2 | 101929693 | ENSG00000265666 |
| HGNC:54077 | RARB-AS1 | 3p24.2 | 105376997 |  |
| HGNC:41376 | RASA2-IT1 | 3q23 | 100874298 | ENSG00000250170 |
| HGNC:39938 | RASA3-IT1 | 13q34 | 100874321 | ENSG00000232487 |
| HGNC:44170 | RASAL2-AS1 | 1q25.2 | 100302401 | ENSG00000224687 |
| HGNC:40499 | RASGRF2-AS1 | 5q14.1 | 102524628 | ENSG00000251450 |
| HGNC:49091 | RASSF1-AS1 | 3p21.3 | 102060282 | ENSG00000281358 |
| HGNC:48637 | RASSF8-AS1 | 12p12.1 | 100506451 | ENSG00000246695 |
| HGNC:42778 | RB1-DT | 13q14.2 | 100862704 | ENSG00000231473 |
| HGNC:33770 | RBAKDN | 7p22.1 | 389458 | ENSG00000273313 |
| HGNC:48591 | RBFADN | 18q23 | 100506070 | ENSG00000261126 |
| HGNC:48871 | RBM5-AS1 | 3p21.31 | 100775107 | ENSG00000281691 |
| HGNC:28818 | RBM12B-AS1 | 8q22.1 | 55472 | ENSG00000279331 |
| HGNC:53636 | RBM15-AS1 | 1p13.3 | 440600 | ENSG00000227963 |
| HGNC:39805 | RBM26-AS1 | 13q31.1 | 100505538 | ENSG00000227354 |
| HGNC:39987 | RBMS3-AS1 | 3p24.1 | 100873977 | ENSG00000235593 |
| HGNC:39988 | RBMS3-AS2 | 3p24.1 | 100873978 | ENSG00000203506 |
| HGNC:39989 | RBMS3-AS3 | 3p24.1 | 100873979 | ENSG00000235904 |
| HGNC:48721 | RBPMS-AS1 | 8p12 | 100128750 | ENSG00000254109 |
| HGNC:41496 | RC3H1-IT1 | 1q25.1 | 106481790 | ENSG00000236535 |
| HGNC:39009 | RCAN3AS | 1p36.11 | 100750325 |  |
| HGNC:41262 | RCC2-AS1 | 1p36.13 |  | ENSG00000227751 |
| HGNC:51658 | RDH10-AS1 | 8q21.11 | 101926926 | ENSG00000250295 |
| HGNC:40501 | RERE-AS1 | 1p36.23 | 102724552 | ENSG00000232912 |
| HGNC:39990 | RERG-AS1 | 12p12.3 | 100873980 | ENSG00000255660 |
| HGNC:39991 | RERG-IT1 | 12p12.3 | 100874290 | ENSG00000256650 |
| HGNC:41377 | REV3L-IT1 | 6q21 | 106478974 | ENSG00000229276 |
| HGNC:9978 | RFPL1S | 22q12.2 | 10740 | ENSG00000225465 |
| HGNC:9981 | RFPL3S | 22q12.3 | 10737 | ENSG00000205853 |
| HGNC:51197 | RFX3-AS1 | 9p24.2 | 101929302 | ENSG00000232104 |
| HGNC:48666 | RGMB-AS1 | 5q15 | 503569 | ENSG00000246763 |
| HGNC:49273 | RGPD4-AS1 | 2q12.3 | 729121 | ENSG00000230651 |
| HGNC:41308 | RHOA-IT1 | 3p21.31 | 106480739 | ENSG00000235908 |
| HGNC:51582 | RHOXF1-AS1 | Xq24 | 101928969 | ENSG00000258545 |
| HGNC:28457 | RHPN1-AS1 | 8q24.3 | 78998 | ENSG00000254389 |
| HGNC:41150 | RMDN2-AS1 | 2p22.2 | 101410544 | ENSG00000235848 |
| HGNC:29893 | RMST | 12q23.1 | 196475 | ENSG00000255794 |
| HGNC:49289 | RNASEH1-AS1 | 2p25.3 | 100506054 | ENSG00000234171 |
| HGNC:39967 | RNASEH2B-AS1 | 13q14.3 | 100874255 | ENSG00000233672 |
| HGNC:48940 | RNF139-AS1 | 8q24.13 | 101927612 | ENSG00000245149 |
| HGNC:30963 | RNF144A-AS1 | 2p25.1 | 386597 | ENSG00000228203 |
| HGNC:44127 | RNF157-AS1 | 17q25.1 | 100507218 | ENSG00000267128 |
| HGNC:41161 | RNF185-AS1 | 22q12.2 | 100852405 | ENSG00000254835 |
| HGNC:41463 | RNF216-IT1 | 7p22.1 | 100874342 | ENSG00000237738 |
| HGNC:50866 | RNF217-AS1 | 6q22.31 | 7955 | ENSG00000236548 |
| HGNC:42700 | RNF219-AS1 | 13q22.3-q31.1 | 100874222 | ENSG00000234377 |
| HGNC:51346 | RNFT1-DT | 17q23.1 | 101927755 | ENSG00000267302 |
| HGNC:52946 | ROCR | 17q24.3 | 102723505 | ENSG00000228639 |
| HGNC:39984 | ROPN1L-AS1 | 5p15.2 | 100505845 | ENSG00000250600 |
| HGNC:40508 | ROR1-AS1 | 1p31.3 | 101927034 | ENSG00000223949 |
| HGNC:51410 | RORA-AS1 | 15q22.2 | 101928784 | ENSG00000245534 |
| HGNC:51411 | RORA-AS2 | 15q22.2 | 100996876 | ENSG00000259482 |
| HGNC:49803 | RORB-AS1 | 9q21.13 | 103752585 | ENSG00000224825 |
| HGNC:45238 | RPARP-AS1 | 10q24.32 | 100505761 | ENSG00000269609 |
| HGNC:26749 | RPL34-AS1 | 4q25 | 285456 | ENSG00000234492 |
| HGNC:40511 | RPS6KA2-AS1 | 6q27 | 100861523 | ENSG00000231654 |
| HGNC:41378 | RPS6KA2-IT1 | 6q27 | 100874353 | ENSG00000232082 |
| HGNC:53744 | RPS6KB2-AS1 | 11q13.2 | 111216279 | ENSG00000255949 |
| HGNC:40512 | RRM1-AS1 | 11p15.4 | 106478966 | ENSG00000255276 |
| HGNC:50465 | RRS1-AS1 | 8q13.1 | 100505676 | ENSG00000246145 |
| HGNC:41439 | RSF1-IT1 | 11q14.1 | 100874308 | ENSG00000255409 |
| HGNC:41438 | RSF1-IT2 | 11q14.1 | 100874307 | ENSG00000254985 |
| HGNC:50573 | RTCA-AS1 | 1p21.2 | 100506007 | ENSG00000224616 |
| HGNC:51344 | RUNDC3A-AS1 | 17q21.31 | 101926996 | ENSG00000267750 |
| HGNC:16623 | RUNX1-IT1 | 21q22.12 | 80215 |  |
| HGNC:53512 | RUNX2-AS1 | 6p21.1 | 105375077 | ENSG00000261080 |
| HGNC:26680 | RUSC1-AS1 | 1q22 | 284618 | ENSG00000225855 |
| HGNC:40514 | RUVBL1-AS1 | 3q21.3 | 100874089 | ENSG00000239608 |
| HGNC:48910 | RXYLT1-AS1 | 12q14.2 | 104169670 | ENSG00000255850 |
| HGNC:39835 | SACS-AS1 | 13q12.12 | 100506680 | ENSG00000229558 |
| HGNC:49001 | SALRNA1 | 14q23.1 | 104548971 | ENSG00000258952 |
| HGNC:49003 | SALRNA2 | 15q23 | 104548973 | ENSG00000280515 |
| HGNC:49002 | SALRNA3 | 15q23 | 104548972 | ENSG00000281264 |
| HGNC:30937 | SAMD12-AS1 | 8q24.12 | 552860 | ENSG00000281641 |
| HGNC:49644 | SAMMSON | 3p13 | 101927152 | ENSG00000240405 |
| HGNC:39599 | SAMSN1-AS1 | 21q11.2 | 100874190 | ENSG00000223662 |
| HGNC:26760 | SAP30L-AS1 | 5q33.2 | 386627 | ENSG00000245275 |
| HGNC:39824 | SAPCD1-AS1 | 6p21.33 | 104413891 | ENSG00000235663 |
| HGNC:50687 | SATB1-AS1 | 3p24.3 | 101927777 | ENSG00000228956 |
| HGNC:26490 | SATB2-AS1 | 2q33.1 | 150538 | ENSG00000225953 |
| HGNC:27438 | SBF2-AS1 | 11p15.4 | 283104 | ENSG00000246273 |
| HGNC:43718 | SCAANT1 | 3p14.1 | 100861563 | ENSG00000280620 |
| HGNC:50544 | SCAMP1-AS1 | 5q14.1 | 728769 | ENSG00000245556 |
| HGNC:52930 | SCAT1 | 17q25.3 | 101928710 | ENSG00000267123 |
| HGNC:53976 | SCAT2 | 12q13.13 | 112935960 | ENSG00000257596 |
| HGNC:40967 | SCAT8 | 6q12 | 112935969 | ENSG00000236345 |
| HGNC:39895 | SCEL-AS1 | 13q22.3 | 104355296 | ENSG00000224347 |
| HGNC:48603 | SCHLAP1 | 2q31.3 | 101669767 | ENSG00000281131 |
| HGNC:54069 | SCN1A-AS1 | 2q24.3 | 101929680 | ENSG00000236107 |
| HGNC:50601 | SCOC-AS1 | 4q31.1 | 100129858 | ENSG00000196951 |
| HGNC:44314 | SDCBP2-AS1 | 20p13 | 100507495 | ENSG00000234684 |
| HGNC:53213 | SEC23A-AS1 | 14q21.1 | 105370458 | ENSG00000258651 |
| HGNC:44003 | SEC24B-AS1 | 4q25 | 100533182 | ENSG00000247950 |
| HGNC:40586 | SEC62-AS1 | 3q26.2 | 106478967 | ENSG00000240373 |
| HGNC:49096 | SEMA3B-AS1 | 3p21.31 | 101928931 | ENSG00000232352 |
| HGNC:40518 | SEMA3F-AS1 | 3p21.31 | 100129060 | ENSG00000235016 |
| HGNC:52973 | SEMA5A-AS1 | 5p15.31 | 101929338 | ENSG00000251370 |
| HGNC:51110 | SEMA6A-AS1 | 5q23.1 | 101927233 | ENSG00000248445 |
| HGNC:52754 | SEMA6A-AS2 | 5q23.1 | 105379132 | ENSG00000249167 |
| HGNC:44177 | SENCR | 11q24.3 | 100507392 | ENSG00000254703 |
| HGNC:27737 | SEPSECS-AS1 | 4p15.2 | 285540 | ENSG00000281501 |
| HGNC:51345 | SEPT4-AS1 | 17q22 | 101927688 | ENSG00000264672 |
| HGNC:51153 | SEPT7-AS1 | 7p14.2 | 101928545 | ENSG00000228878 |
| HGNC:32019 | SERTAD4-AS1 | 1q32.2 | 574036 | ENSG00000203706 |
| HGNC:51589 | SFTPD-AS1 | 10q22.3 | 105419997 | ENSG00000273372 |
| HGNC:49683 | SGMS1-AS1 | 10q11.23 | 104355295 | ENSG00000226200 |
| HGNC:41081 | SGO1-AS1 | 3p24.3 | 100874028 | ENSG00000231304 |
| HGNC:44501 | SH3BP5-AS1 | 3p25.1 | 100505696 | ENSG00000224660 |
| HGNC:45242 | SH3PXD2A-AS1 | 10q24.33 | 100505839 | ENSG00000280693 |
| HGNC:44168 | SH3RF3-AS1 | 2q13 | 100287216 | ENSG00000259863 |
| HGNC:52905 | SH3TC2-DT | 5q32 | 255187 | ENSG00000250072 |
| HGNC:40014 | SHANK2-AS1 | 11q13.4 | 100874198 | ENSG00000226627 |
| HGNC:40015 | SHANK2-AS2 | 11q13.4 | 100874199 | ENSG00000236262 |
| HGNC:25098 | SHANK2-AS3 | 11q13.4 | 220070 | ENSG00000171671 |
| HGNC:40526 | SIAH2-AS1 | 3q25.1 | 100874005 | ENSG00000244265 |
| HGNC:41126 | SIDT1-AS1 | 3q13.2 | 100874030 | ENSG00000239453 |
| HGNC:41495 | SIK3-IT1 | 11q23.3 | 100874315 | ENSG00000231865 |
| HGNC:26403 | SILC1 | 2p25.2 | 150622 | ENSG00000232044 |
| HGNC:53902 | SIRLNT | 8p11.21 | 112543493 | ENSG00000253802 |
| HGNC:51229 | SIRPG-AS1 | 20p13 | 101929010 | ENSG00000237914 |
| HGNC:51912 | SIRT1-AS | 10q21.3 | 106633813 |  |
| HGNC:40532 | SIX3-AS1 | 2p21 | 100506108 | ENSG00000236502 |
| HGNC:53166 | SKAP1-AS1 | 17q21.32 | 110806289 | ENSG00000263787 |
| HGNC:44187 | SLC2A1-AS1 | 1p34.2 | 440584 | ENSG00000227533 |
| HGNC:53163 | SLC5A4-AS1 | 22q12.3 | 110806273 | ENSG00000242082 |
| HGNC:40546 | SLC6A1-AS1 | 3p25.3 | 100874090 | ENSG00000232287 |
| HGNC:44064 | SLC7A11-AS1 | 4q28.3 | 641364 | ENSG00000250033 |
| HGNC:54092 | SLC7A14-AS1 | 3q26.2 | 101928583 | ENSG00000285051 |
| HGNC:44102 | SLC8A1-AS1 | 2p22.1 | 100128590 | ENSG00000227028 |
| HGNC:40550 | SLC9A3-AS1 | 5p15.33 | 100288152 | ENSG00000225138 |
| HGNC:40928 | SLC9A9-AS1 | 3q24 | 100885796 | ENSG00000240012 |
| HGNC:40929 | SLC9A9-AS2 | 3q24 | 106480356 | ENSG00000244493 |
| HGNC:53143 | SLC12A5-AS1 | 20q13.12 | 109729184 | ENSG00000204044 |
| HGNC:40807 | SLC12A9-AS1 | 7q22.1 | 105375430 | ENSG00000236305 |
| HGNC:51125 | SLC14A2-AS1 | 18q12.3 | 101927980 | ENSG00000267097 |
| HGNC:49445 | SLC16A1-AS1 | 1p13.2 | 100506392 | ENSG00000226419 |
| HGNC:51205 | SLC16A12-AS1 | 10q23.31 | 101926906 | ENSG00000234452 |
| HGNC:43438 | SLC25A5-AS1 | Xq24 | 100303728 | ENSG00000224281 |
| HGNC:44298 | SLC25A21-AS1 | 14q13.3 | 100129794 | ENSG00000258708 |
| HGNC:27844 | SLC25A25-AS1 | 9q34.11 | 100289019 | ENSG00000234771 |
| HGNC:42795 | SLC25A30-AS1 | 13q14.13 | 100874259 | ENSG00000251015 |
| HGNC:53623 | SLC25A34-AS1 | 1p36.21 | 110806303 | ENSG00000224459 |
| HGNC:22385 | SLC26A4-AS1 | 7q22.3 | 286002 | ENSG00000233705 |
| HGNC:40686 | SLC26A9-AS1 | 1q32.1 | 103021296 |  |
| HGNC:44881 | SLC39A12-AS1 | 10p12.33 | 100129213 | ENSG00000226083 |
| HGNC:49057 | SLC44A3-AS1 | 1p21.3 | 101928079 | ENSG00000224081 |
| HGNC:40537 | SLCO4A1-AS1 | 20q13.33 | 100127888 | ENSG00000232803 |
| HGNC:44126 | SLFNL1-AS1 | 1p34.2 | 100507178 | ENSG00000281207 |
| HGNC:51198 | SLIT1-AS1 | 10q24.1 | 100505540 | ENSG00000234855 |
| HGNC:41383 | SLIT2-IT1 | 4p15.31 | 100505893 | ENSG00000248228 |
| HGNC:49379 | SMAD1-AS1 | 4q31.21 | 104326058 | ENSG00000250902 |
| HGNC:49381 | SMAD1-AS2 | 4q31.21 | 101927659 | ENSG00000250582 |
| HGNC:30586 | SMAD5-AS1 | 5q31.1 | 9597 | ENSG00000164621 |
| HGNC:39963 | SMAD9-IT1 | 13q13.3 | 100874072 | ENSG00000236711 |
| HGNC:39982 | SMARCA5-AS1 | 4q31.21 | 100128055 | ENSG00000245112 |
| HGNC:50827 | SMC2-AS1 | 9q31.1 | 101928550 | ENSG00000270332 |
| HGNC:48718 | SMC5-AS1 | 9q21.12 | 100507299 | ENSG00000268364 |
| HGNC:17914 | SMCR2 | 17p11.2 | 105371564 | ENSG00000223979 |
| HGNC:17918 | SMCR5 | 17p11.2 | 140771 | ENSG00000226746 |
| HGNC:17919 | SMCR6 | 17p11.2 | 140772 |  |
| HGNC:1220 | SMG6-IT1 | 17p13.3 | 53400 | ENSG00000278941 |
| HGNC:24518 | SMG7-AS1 | 1q25.3 | 284649 | ENSG00000232860 |
| HGNC:51825 | SMILR | 8q24.13 | 105375734 | ENSG00000255364 |
| HGNC:42674 | SMIM2-AS1 | 13q14.11 | 101929212 | ENSG00000227258 |
| HGNC:41492 | SMIM2-IT1 | 13q14.11 | 100874377 | ENSG00000235285 |
| HGNC:53137 | SMIM10L2B-AS1 | Xq26.3 | 100287728 | ENSG00000228372 |
| HGNC:41293 | SMIM15-AS1 | 5q12.1 | 101928630 | ENSG00000251279 |
| HGNC:53307 | SMUG1-AS1 | 12q13.13 | 105369776 | ENSG00000283073 |
| HGNC:41406 | SMYD3-IT1 | 1q44 | 106478975 | ENSG00000230184 |
| HGNC:28327 | SNAI3-AS1 | 16q24.2 | 197187 | ENSG00000260630 |
| HGNC:44312 | SNAP25-AS1 | 20p12.2 | 100131208 | ENSG00000227906 |
| HGNC:41501 | SNAP47-AS1 | 1q42.13 | 100885800 | ENSG00000230005 |
| HGNC:50600 | SNCA-AS1 | 4q22.1 | 644248 | ENSG00000247775 |
| HGNC:24158 | SND1-IT1 | 7q32.1 | 27099 | ENSG00000279078 |
| HGNC:32688 | SNHG1 | 11q12.3 | 23642 | ENSG00000255717 |
| HGNC:10118 | SNHG3 | 1p35.3 | 8420 | ENSG00000242125 |
| HGNC:32964 | SNHG4 | 5q31.2 | 724102 | ENSG00000281398 |
| HGNC:21026 | SNHG5 | 6q14.3 | 387066 | ENSG00000203875 |
| HGNC:32965 | SNHG6 | 8q13.1 | 641638 | ENSG00000245910 |
| HGNC:28254 | SNHG7 | 9q34.3 | 84973 | ENSG00000233016 |
| HGNC:33098 | SNHG8 | 4q26 | 100093630 | ENSG00000269893 |
| HGNC:33102 | SNHG9 | 16p13.3 | 735301 | ENSG00000255198 |
| HGNC:27510 | SNHG10 | 14q32.13 | 283596 | ENSG00000247092 |
| HGNC:25046 | SNHG11 | 20q11.23 | 128439 | ENSG00000174365 |
| HGNC:30062 | SNHG12 | 1p35.3 | 85028 | ENSG00000197989 |
| HGNC:37462 | SNHG14 | 15q11.2 | 104472715 | ENSG00000224078 |
| HGNC:27797 | SNHG15 | 7p13 | 285958 | ENSG00000232956 |
| HGNC:44352 | SNHG16 | 17q25.1 | 100507246 | ENSG00000163597 |
| HGNC:48600 | SNHG17 | 20q11.23 | 388796 | ENSG00000196756 |
| HGNC:49007 | SNHG18 | 5p15.31 | 100505806 | ENSG00000250786 |
| HGNC:49574 | SNHG19 | 16p13.3 | 100507303 | ENSG00000260260 |
| HGNC:33099 | SNHG20 | 17q25.2 | 654434 | ENSG00000234912 |
| HGNC:50284 | SNHG21 | 15q25.2 | 100505616 | ENSG00000250988 |
| HGNC:50285 | SNHG22 | 18q21.1 | 103091864 | ENSG00000267322 |
| HGNC:51534 | SNHG25 | 17q23.3 | 105376843 | ENSG00000266402 |
| HGNC:53131 | SNHG26 | 7p15.3 | 109729180 | ENSG00000228649 |
| HGNC:53481 | SNHG27 | 4q28.3 | 101927305 | ENSG00000251676 |
| HGNC:27647 | SNHG28 | 1q23.2 | 284677 | ENSG00000188004 |
| HGNC:28619 | SNHG29 | 17p11.2 | 125144 | ENSG00000175061 |
| HGNC:41269 | SNRK-AS1 | 3p22.1 | 100873954 | ENSG00000234617 |
| HGNC:54058 | SNTG2-AS1 | 2p25.3 | 101060391 | ENSG00000235688 |
| HGNC:27054 | SOCS2-AS1 | 12q22 | 144481 | ENSG00000246985 |
| HGNC:53445 | SOD2-OT1 | 6q25.3 | 100129518 | ENSG00000285427 |
| HGNC:45244 | SORCS3-AS1 | 10q25.1 | 100505890 | ENSG00000226387 |
| HGNC:41385 | SOS1-IT1 | 2p22.1 | 100505911 | ENSG00000229692 |
| HGNC:42733 | SOX1-OT | 13q34 | 100505996 | ENSG00000224243 |
| HGNC:20209 | SOX2-OT | 3q26.33 | 347689 | ENSG00000242808 |
| HGNC:53311 | SOX5-AS1 | 12p12.1 | 101928471 | ENSG00000256120 |
| HGNC:49321 | SOX9-AS1 | 17q24.3 | 400618 | ENSG00000234899 |
| HGNC:39807 | SOX21-AS1 | 13q32.1 | 100507533 | ENSG00000227640 |
| HGNC:51341 | SP2-AS1 | 17q21.32 | 100506325 | ENSG00000234494 |
| HGNC:49383 | SPACA6P-AS | 19q13.41 | 102238594 | ENSG00000269959 |
| HGNC:41140 | SPAG5-AS1 | 17q11.2 | 100506436 | ENSG00000227543 |
| HGNC:31683 | SPANXA2-OT1 | Xq27.2 | 619455 | ENSG00000277215 |
| HGNC:39933 | SPART-AS1 | 13q13.3 | 100507135 | ENSG00000120664 |
| HGNC:28013 | SPATA3-AS1 | 2q37.1 | 348761 | ENSG00000238062 |
| HGNC:28676 | SPATA8 | 15q26.2 | 145946 | ENSG00000185594 |
| HGNC:48627 | SPATA8-AS1 | 15q26.2 | 100652749 | ENSG00000259282 |
| HGNC:39905 | SPATA13-AS1 | 13q12.12 | 100874231 | ENSG00000227213 |
| HGNC:41086 | SPATA17-AS1 | 1q41 | 103752555 | ENSG00000234070 |
| HGNC:48613 | SPATA41 | 15q26.3 | 388182 | ENSG00000189419 |
| HGNC:41198 | SPATA42 | 1p13.3 | 642864 | ENSG00000203897 |
| HGNC:41177 | SPIN4-AS1 | Xq11.1 | 100874033 | ENSG00000233661 |
| HGNC:53162 | SPINT1-AS1 | 15q15.1 | 102724362 | ENSG00000261183 |
| HGNC:53117 | SPON1-AS1 | 11p15.2 | 109729138 | ENSG00000254418 |
| HGNC:53465 | SPRY4-AS1 | 5q31.3 | 101926941 | ENSG00000231185 |
| HGNC:42394 | SPRY4-IT1 | 5q31.3 | 100642175 |  |
| HGNC:44138 | SRD5A3-AS1 | 4q12 | 100506462 | ENSG00000249700 |
| HGNC:53953 | SREBF2-AS1 | 22q13.2 | 112637020 | ENSG00000184068 |
| HGNC:40902 | SRGAP2-AS1 | 1p11.2 | 100873165 | ENSG00000230806 |
| HGNC:40898 | SRGAP3-AS1 | 3p25.3 | 100874103 | ENSG00000224808 |
| HGNC:40899 | SRGAP3-AS2 | 3p25.3 | 101927416 | ENSG00000228723 |
| HGNC:40900 | SRGAP3-AS3 | 3p25.3 | 100288831 | ENSG00000227929 |
| HGNC:42434 | SRGAP3-AS4 | 3p25.3 | 101927440 | ENSG00000235830 |
| HGNC:48619 | SRP14-AS1 | 15q15.1 | 100131089 | ENSG00000248508 |
| HGNC:50643 | SRP54-AS1 | 14q13.2 | 100506157 | ENSG00000258704 |
| HGNC:44162 | SRRM2-AS1 | 16p13.3 | 100128788 | ENSG00000205913 |
| HGNC:32328 | SSBP3-AS1 | 1p32.3 | 619518 | ENSG00000198711 |
| HGNC:27384 | SSSCA1-AS1 | 11q13.1 | 254100 | ENSG00000260233 |
| HGNC:26502 | SSTR5-AS1 | 16p13.3 | 146336 | ENSG00000261713 |
| HGNC:51129 | ST3GAL5-AS1 | 2p11.2 | 101928113 | ENSG00000232504 |
| HGNC:40828 | ST3GAL6-AS1 | 3q12.1 | 100874207 | ENSG00000239445 |
| HGNC:41380 | ST6GAL2-IT1 | 2q12.2 | 100874354 | ENSG00000238250 |
| HGNC:16000 | ST7-AS1 | 7q31.2 | 93653 | ENSG00000227199 |
| HGNC:16044 | ST7-AS2 | 7q31.2 | 93654 | ENSG00000226367 |
| HGNC:16045 | ST7-OT3 | 7q31.3 | 93655 |  |
| HGNC:44880 | ST8SIA6-AS1 | 10p12.33 | 100128098 | ENSG00000204832 |
| HGNC:27521 | ST20-AS1 | 15q25.1 | 283687 | ENSG00000259642 |
| HGNC:49568 | STAM-AS1 | 10p12.33 | 102723166 | ENSG00000260589 |
| HGNC:44117 | STARD4-AS1 | 5q22.1 | 100505678 | ENSG00000246859 |
| HGNC:40827 | STARD7-AS1 | 2q11.2 | 285033 | ENSG00000204685 |
| HGNC:40873 | STARD13-AS | 13q13.1 | 100874241 | ENSG00000236581 |
| HGNC:41453 | STARD13-IT1 | 13q13.1 | 100874373 | ENSG00000230300 |
| HGNC:44101 | STAU2-AS1 | 8q21.11 | 100128126 | ENSG00000253302 |
| HGNC:40820 | STEAP2-AS1 | 7q21.13 | 100874100 | ENSG00000227646 |
| HGNC:41053 | STEAP3-AS1 | 2q14.2 | 100874111 | ENSG00000229867 |
| HGNC:40879 | STIM2-AS1 | 4p15.2 | 105374546 | ENSG00000240005 |
| HGNC:43811 | STK4-AS1 | 20q13.12 | 100505826 | ENSG00000227477 |
| HGNC:39935 | STK24-AS1 | 13q32.2 | 100874069 | ENSG00000224418 |
| HGNC:53468 | STK32A-AS1 | 5q32 | 105378217 | ENSG00000250343 |
| HGNC:41209 | STPG2-AS1 | 4q22.3 | 101410545 | ENSG00000251620 |
| HGNC:51176 | STPG3-AS1 | 9q34.3 | 100129722 | ENSG00000275549 |
| HGNC:44585 | STT3A-AS1 | 11q24.2 | 105369550 | ENSG00000254671 |
| HGNC:51174 | STX17-AS1 | 9q31.1 | 441461 | ENSG00000255145 |
| HGNC:48877 | STX18-AS1 | 4p16.2 | 100507266 | ENSG00000247708 |
| HGNC:41415 | STX18-IT1 | 4p16.3 | 104472519 | ENSG00000248221 |
| HGNC:44183 | STXBP5-AS1 | 6q24.3 | 729178 | ENSG00000233452 |
| HGNC:39965 | SUCLA2-AS1 | 13q14.2 | 101929410 | ENSG00000227848 |
| HGNC:49643 | SUCLG2-AS1 | 3p14.1 | 101927111 | ENSG00000241316 |
| HGNC:51219 | SVIL-AS1 | 10p11.23 | 102724316 | ENSG00000224597 |
| HGNC:40793 | SYNE1-AS1 | 6q25.2 | 100505475 | ENSG00000234577 |
| HGNC:53831 | SYNGAP1-AS1 | 6p21.32 | 112390310 | ENSG00000274259 |
| HGNC:41387 | SYNJ2-IT1 | 6q25.3 | 100874300 | ENSG00000233496 |
| HGNC:40774 | SYNPR-AS1 | 3p14.2 | 100874016 | ENSG00000241359 |
| HGNC:40571 | SYP-AS1 | Xp11.23 | 100873921 | ENSG00000237341 |
| HGNC:41225 | SZT2-AS1 | 1p34.2 | 100873952 | ENSG00000229372 |
| HGNC:53508 | TAB2-AS1 | 6q25.1 | 105378049 | ENSG00000225924 |
| HGNC:20176 | TAB3-AS1 | Xp21.2 | 727682 | ENSG00000231542 |
| HGNC:40013 | TAB3-AS2 | Xp21.2 | 100873926 | ENSG00000235512 |
| HGNC:40573 | TAF1A-AS1 | 1q41 | 100506161 | ENSG00000225265 |
| HGNC:26832 | TAPT1-AS1 | 4p15.32 | 202020 | ENSG00000263327 |
| HGNC:50506 | TARID | 6q23.2 | 100507308 | ENSG00000227954 |
| HGNC:51369 | TAT-AS1 | 16q22.2 | 100132529 | ENSG00000260886 |
| HGNC:52782 | TBC1D8-AS1 | 2q11.2 | 100506286 | ENSG00000272902 |
| HGNC:51221 | TBC1D22A-AS1 | 22q13.31 | 642757 | ENSG00000280080 |
| HGNC:53943 | TBILA | 3q13.2 | 112806053 | ENSG00000261488 |
| HGNC:41243 | TBL1XR1-AS1 | 3q26.32 | 100874217 | ENSG00000231310 |
| HGNC:50355 | TBX2-AS1 | 17q23.2 | 103689912 | ENSG00000267280 |
| HGNC:27402 | TBX5-AS1 | 12q24.21 | 255480 | ENSG00000255399 |
| HGNC:52256 | TBX18-AS1 | 6q14.3 | 102724201 | ENSG00000228290 |
| HGNC:41191 | TCEAL3-AS1 | Xq22.2 | 100874119 | ENSG00000224031 |
| HGNC:49532 | TCERG1L-AS1 | 10q26.3 | 101927489 | ENSG00000230098 |
| HGNC:51642 | TCF4-AS1 | 18q21.2 | 105372127 | ENSG00000267028 |
| HGNC:51643 | TCF4-AS2 | 18q21.2 | 106480339 | ENSG00000267402 |
| HGNC:41388 | TCF7L1-IT1 | 2p11.2 | 100874334 | ENSG00000231134 |
| HGNC:13463 | TCL6 | 14q32.13 | 27004 | ENSG00000187621 |
| HGNC:40578 | TDRKH-AS1 | 1q21.3 | 109729141 | ENSG00000203288 |
| HGNC:53456 | TEMN3-AS1 | 4q34.3 | 105377573 | ENSG00000251336 |
| HGNC:28076 | TENM3-AS1 | 4q34.3 | 90768 | ENSG00000177822 |
| HGNC:51142 | TESC-AS1 | 12q24.22 | 101928244 | ENSG00000258285 |
| HGNC:41125 | TET2-AS1 | 4q24 | 104384744 | ENSG00000251586 |
| HGNC:42784 | TEX26-AS1 | 13q12.3 | 100507064 | ENSG00000224743 |
| HGNC:49500 | TEX36-AS1 | 10q26.13 | 100169752 | ENSG00000237675 |
| HGNC:48667 | TEX41 | 2q22.3 | 401014 | ENSG00000226674 |
| HGNC:40579 | TFAP2A-AS1 | 6p24.3 | 100130275 | ENSG00000229950 |
| HGNC:52289 | TFAP2A-AS2 | 6p24.3 | 109729173 |  |
| HGNC:41389 | TGFA-IT1 | 2p13.3 | 100874273 | ENSG00000224606 |
| HGNC:50628 | TGFB2-AS1 | 1q41 | 728463 | ENSG00000232480 |
| HGNC:50629 | TGFB2-OT1 | 1q41 | 103611157 | ENSG00000281453 |
| HGNC:53144 | TGFB3-AS1 | 14q24.3 | 109729179 | ENSG00000258876 |
| HGNC:40495 | TH2LCRR | 5q31.1 | 101927761 | ENSG00000223442 |
| HGNC:41013 | THAP7-AS1 | 22q11.21 | 439931 | ENSG00000230513 |
| HGNC:44172 | THAP9-AS1 | 4q21.22 | 100499177 | ENSG00000251022 |
| HGNC:41249 | THOC7-AS1 | 3p14.1 | 100874039 | ENSG00000240549 |
| HGNC:53788 | THORLNC | 2q14.2 | 100506797 | ENSG00000226856 |
| HGNC:44515 | THRB-AS1 | 3p24.2 | 644990 | ENSG00000228791 |
| HGNC:41390 | THRB-IT1 | 3p24.2 | 100874274 | ENSG00000224822 |
| HGNC:49503 | THRIL | 12q24.31 | 102659353 | ENSG00000280634 |
| HGNC:51420 | THSD4-AS1 | 15q23 | 101929196 | ENSG00000259964 |
| HGNC:51421 | THSD4-AS2 | 15q23 | 101929173 |  |
| HGNC:44478 | THUMPD3-AS1 | 3p25.3 | 440944 | ENSG00000206573 |
| HGNC:41028 | TIPARP-AS1 | 3q25.31 | 100287227 | ENSG00000243926 |
| HGNC:40720 | TLR8-AS1 | Xp22.2 | 349408 | ENSG00000233338 |
| HGNC:37183 | TLX1NB | 10q24.31 | 100038246 | ENSG00000236311 |
| HGNC:40587 | TM4SF1-AS1 | 3q25.1 | 100874091 | ENSG00000240541 |
| HGNC:41085 | TM4SF19-AS1 | 3q29 | 100874214 | ENSG00000235897 |
| HGNC:51424 | TMC3-AS1 | 15q25.1 | 101929655 | ENSG00000259343 |
| HGNC:49060 | TMCC1-AS1 | 3q22.1 | 100507032 | ENSG00000271270 |
| HGNC:54046 | TMCO1-AS1 | 1q24.1 | 100147773 | ENSG00000224358 |
| HGNC:19230 | TMEM9B-AS1 | 11p15.4 | 493900 | ENSG00000254860 |
| HGNC:51209 | TMEM26-AS1 | 10q21.2 | 101928781 | ENSG00000237233 |
| HGNC:44272 | TMEM44-AS1 | 3q29 | 100507297 | ENSG00000231770 |
| HGNC:26301 | TMEM51-AS1 | 1p36.21 | 200197 | ENSG00000175147 |
| HGNC:27349 | TMEM72-AS1 | 10q11.21 | 220980 | ENSG00000224812 |
| HGNC:50442 | TMEM92-AS1 | 17q21.33 | 103752589 | ENSG00000251179 |
| HGNC:26794 | TMEM105 | 17q25.3 | 284186 | ENSG00000185332 |
| HGNC:50307 | TMEM108-AS1 | 3q22.1 | 101927455 | ENSG00000251011 |
| HGNC:27466 | TMEM132D-AS1 | 12q24.33 | 283352 | ENSG00000249196 |
| HGNC:53324 | TMEM132D-AS2 | 12q24.33 | 101927735 | ENSG00000256699 |
| HGNC:51273 | TMEM147-AS1 | 19q13.12 | 100506469 | ENSG00000236144 |
| HGNC:43839 | TMEM161B-AS1 | 5q14.3 | 100505894 | ENSG00000247828 |
| HGNC:53265 | TMEM202-AS1 | 15q24.1 | 105370888 | ENSG00000261423 |
| HGNC:41939 | TMEM212-AS1 | 3q26.31 | 100874219 | ENSG00000234717 |
| HGNC:41505 | TMEM212-IT1 | 3q26.31 | 100874359 | ENSG00000235943 |
| HGNC:44357 | TMEM220-AS1 | 17p13.1-p12 | 101101775 | ENSG00000263400 |
| HGNC:51191 | TMEM246-AS1 | 9q31.1 | 101928470 | ENSG00000225376 |
| HGNC:27340 | TMEM254-AS1 | 10q22.3 | 219347 | ENSG00000230091 |
| HGNC:44261 | TMLHE-AS1 | Xq28 | 100507404 | ENSG00000224533 |
| HGNC:44158 | TMPO-AS1 | 12q23.1 | 100128191 | ENSG00000257167 |
| HGNC:53858 | TMSB15B-AS1 | Xq22.2 | 100128594 | ENSG00000231728 |
| HGNC:53164 | TNFRSF10A-AS1 | 8p21.3 | 110806274 | ENSG00000253930 |
| HGNC:26966 | TNFRSF14-AS1 | 1p36.32 | 115110 | ENSG00000238164 |
| HGNC:49093 | TNK2-AS1 | 3q29 | 100128262 | ENSG00000224614 |
| HGNC:45173 | TNKS2-AS1 | 10q23.32 | 100507633 | ENSG00000228701 |
| HGNC:41391 | TNR-IT1 | 1q25.1 | 100874256 | ENSG00000235628 |
| HGNC:44360 | TNRC6C-AS1 | 17q25.3 | 100131096 | ENSG00000204282 |
| HGNC:44340 | TOB1-AS1 | 17q21.33 | 400604 | ENSG00000229980 |
| HGNC:27403 | TOLLIP-AS1 | 11p15.5 | 255512 | ENSG00000255153 |
| HGNC:51556 | TONSL-AS1 | 8q24.3 | 100287098 | ENSG00000232600 |
| HGNC:43652 | TP53COR1 | 6p21.2 | 102800311 |  |
| HGNC:17026 | TP53TG1 | 7q21.12 | 11257 | ENSG00000182165 |
| HGNC:29052 | TP73-AS1 | 1p36.32 | 57212 | ENSG00000227372 |
| HGNC:53635 | TPM1-AS | 15q22.2 | 111064646 | ENSG00000259498 |
| HGNC:42391 | TPRG1-AS1 | 3q28 | 100874043 | ENSG00000234076 |
| HGNC:41062 | TPRG1-AS2 | 3q28 | 100874027 | ENSG00000230115 |
| HGNC:43686 | TPT1-AS1 | 13q14.13 | 100190939 | ENSG00000170919 |
| HGNC:40005 | TRAF3IP2-AS1 | 6q21 | 643749 | ENSG00000231889 |
| HGNC:48663 | TRAM2-AS1 | 6p12.2 | 401264 | ENSG00000225791 |
| HGNC:41046 | TRAPPC12-AS1 | 2p25.3 | 100861515 | ENSG00000225234 |
| HGNC:40592 | TRDN-AS1 | 6q22.31 | 101927990 | ENSG00000235535 |
| HGNC:44307 | TRERNA1 | 20q13.13 | 100887755 | ENSG00000231265 |
| HGNC:48974 | TRG-AS1 | 7p14.1 | 100506776 | ENSG00000281103 |
| HGNC:27471 | TRHDE-AS1 | 12q21.1 | 283392 | ENSG00000236333 |
| HGNC:39761 | TRIM31-AS1 | 6p22.1 | 104533120 | ENSG00000231226 |
| HGNC:41422 | TRIM36-IT1 | 5q22.3 | 100874338 | ENSG00000250472 |
| HGNC:49006 | TRIM52-AS1 | 5q35.3 | 100507602 | ENSG00000248275 |
| HGNC:41116 | TRMT2B-AS1 | Xq22.1 | 106481789 | ENSG00000225839 |
| HGNC:40936 | TRPC7-AS1 | 5q31.1 | 100874024 | ENSG00000248211 |
| HGNC:40937 | TRPC7-AS2 | 5q31.1 | 106478968 | ENSG00000250947 |
| HGNC:50758 | TRPM2-AS | 21q22.3 | 101928607 | ENSG00000230061 |
| HGNC:39756 | TSBP1-AS1 | 6p21.32 | 101929163 | ENSG00000225914 |
| HGNC:43684 | TSC22D1-AS1 | 13q14.11 | 641467 | ENSG00000278156 |
| HGNC:12377 | TSIX | Xq13.2 | 9383 | ENSG00000270641 |
| HGNC:41462 | TSPAN9-IT1 | 12p13.33 | 100874356 | ENSG00000256197 |
| HGNC:1271 | TSPEAR-AS1 | 21q22.3 | 54082 | ENSG00000235890 |
| HGNC:16428 | TSPEAR-AS2 | 21q22.3 | 114043 | ENSG00000182912 |
| HGNC:44148 | TSPOAP1-AS1 | 17q22 | 100506779 | ENSG00000265148 |
| HGNC:40595 | TTC3-AS1 | 21q22.13 | 100874006 | ENSG00000228677 |
| HGNC:41115 | TTC21B-AS1 | 2q24.3 | 100506134 | ENSG00000224490 |
| HGNC:29336 | TTC28-AS1 | 22q12.1 | 284900 | ENSG00000235954 |
| HGNC:40851 | TTC39A-AS1 | 1p32.3 | 102724097 | ENSG00000261664 |
| HGNC:51321 | TTC39C-AS1 | 18q11.2 | 102724246 | ENSG00000264745 |
| HGNC:41486 | TTLL7-IT1 | 1p31.1 | 100874314 | ENSG00000233061 |
| HGNC:41159 | TTLL10-AS1 | 1p36.33 | 100506376 | ENSG00000205231 |
| HGNC:24214 | TTLL11-IT1 | 9q34.11 | 105376261 | ENSG00000237548 |
| HGNC:44124 | TTN-AS1 | 2q31.2 | 100506866 | ENSG00000237298 |
| HGNC:14022 | TTTY1 | Yp11.2 | 50858 | ENSG00000129845 |
| HGNC:37981 | TTTY1B | Yp11.2 | 100101116 | ENSG00000129816 |
| HGNC:14023 | TTTY2 | Yp11.2 | 60439 | ENSG00000212855 |
| HGNC:37982 | TTTY2B | Yp11.2 | 100101117 | ENSG00000212856 |
| HGNC:16480 | TTTY3 | Yq11.23 | 114760 | ENSG00000231141 |
| HGNC:31888 | TTTY3B | Yq11.23 | 474148 | ENSG00000280961 |
| HGNC:16481 | TTTY4 | Yq11.223 | 114761 | ENSG00000226906 |
| HGNC:31891 | TTTY4B | Yq11.23 | 474149 | ENSG00000235412 |
| HGNC:31892 | TTTY4C | Yq11.23 | 474150 | ENSG00000228296 |
| HGNC:16482 | TTTY5 | Yq11.223 | 83863 | ENSG00000215560 |
| HGNC:16483 | TTTY6 | Yq11.223 | 84672 | ENSG00000131538 |
| HGNC:31887 | TTTY6B | Yq11.223 | 441543 | ENSG00000131548 |
| HGNC:18488 | TTTY7 | Yp11.2 | 246122 | ENSG00000147753 |
| HGNC:37463 | TTTY7B | Yp11.2 | 100101120 | ENSG00000147761 |
| HGNC:18489 | TTTY8 | Yp11.2 | 84673 | ENSG00000183385 |
| HGNC:37622 | TTTY8B | Yp11.2 | 100101118 | ENSG00000185700 |
| HGNC:18490 | TTTY9A | Yq11.222 | 83864 |  |
| HGNC:32425 | TTTY9B | Yq11.222 | 425057 | ENSG00000131007 |
| HGNC:18491 | TTTY10 | Yq11.223 | 246119 | ENSG00000229236 |
| HGNC:18492 | TTTY11 | Yp11.2 | 83866 | ENSG00000180910 |
| HGNC:18493 | TTTY12 | Yp11.2 | 83867 | ENSG00000237048 |
| HGNC:18494 | TTTY13 | Yq11.223 | 83868 | ENSG00000184991 |
| HGNC:38596 | TTTY13B | Yp11.2 | 100287735 |  |
| HGNC:18495 | TTTY14 | Yq11.222 | 83869 | ENSG00000176728 |
| HGNC:18567 | TTTY15 | Yq11.221 | 64595 | ENSG00000233864 |
| HGNC:18840 | TTTY16 | Yp11.2 | 252948 | ENSG00000225520 |
| HGNC:18841 | TTTY17A | Yq11.223 | 252949 | ENSG00000228240 |
| HGNC:31889 | TTTY17B | Yq11.23 | 474151 | ENSG00000227439 |
| HGNC:31890 | TTTY17C | Yq11.23 | 474152 | ENSG00000223641 |
| HGNC:18842 | TTTY18 | Yp11.2 | 252950 | ENSG00000233699 |
| HGNC:18843 | TTTY19 | Yp11.2 | 252952 | ENSG00000232419 |
| HGNC:18844 | TTTY20 | Yp11.2 | 252951 | ENSG00000232808 |
| HGNC:18845 | TTTY21 | Yp11.2 | 252953 | ENSG00000228890 |
| HGNC:37980 | TTTY21B | Yp11.2 | 100101115 | ENSG00000237563 |
| HGNC:18846 | TTTY22 | Yp11.2 | 252954 | ENSG00000224075 |
| HGNC:18847 | TTTY23 | Yp11.2 | 252955 | ENSG00000239225 |
| HGNC:37983 | TTTY23B | Yp11.2 | 100101121 | ENSG00000250204 |
| HGNC:51120 | TUB-AS1 | 11p15.4 | 101927917 | ENSG00000248332 |
| HGNC:26066 | TUG1 | 22q12.2 | 55000 | ENSG00000253352 |
| HGNC:44088 | TUNAR | 14q32.2 | 100507043 | ENSG00000250366 |
| HGNC:27701 | TUSC7 | 3q13.31 | 285194 | ENSG00000243197 |
| HGNC:49111 | TUSC8 | 13q14.11 | 400128 | ENSG00000237361 |
| HGNC:30008 | TXNDC12-AS1 | 1p32.3 | 104355143 | ENSG00000228369 |
| HGNC:49083 | UBA6-AS1 | 4q13.2 | 550112 | ENSG00000248049 |
| HGNC:42502 | UBAC2-AS1 | 13q32.3 | 100289373 | ENSG00000228889 |
| HGNC:54095 | UBE2D3-AS1 | 4q24 | 105377348 | ENSG00000246560 |
| HGNC:40598 | UBE2E1-AS1 | 3p24.3 | 100874092 | ENSG00000223791 |
| HGNC:44512 | UBE2E2-AS1 | 3p24.3 | 100505877 | ENSG00000233153 |
| HGNC:40722 | UBE2Q1-AS1 | 1q21.3 | 100874097 | ENSG00000229780 |
| HGNC:49911 | UBE2R2-AS1 | 9p13.3 | 101929665 | ENSG00000235481 |
| HGNC:48614 | UBL7-AS1 | 15q24.1 | 440288 | ENSG00000247240 |
| HGNC:44111 | UBOX5-AS1 | 20p13 | 100134015 | ENSG00000235958 |
| HGNC:51661 | UBR5-AS1 | 8q22.3 | 101927221 | ENSG00000246263 |
| HGNC:41227 | UBXN7-AS1 | 3q29 | 100874034 | ENSG00000225822 |
| HGNC:41141 | UBXN10-AS1 | 1p36.12 | 101928017 | ENSG00000225986 |
| HGNC:37126 | UCA1 | 19p13.12 | 652995 | ENSG00000214049 |
| HGNC:40600 | UCHL1-AS1 | 4p13 | 101410542 | ENSG00000251173 |
| HGNC:31967 | UCKL1-AS1 | 20q13.33 | 100113386 | ENSG00000280213 |
| HGNC:41007 | UFL1-AS1 | 6q16.1 | 100861530 | ENSG00000233797 |
| HGNC:40601 | UGDH-AS1 | 4p14 | 100885776 | ENSG00000249348 |
| HGNC:51824 | UMLILO | 4q13.3 |  | ENSG00000228277 |
| HGNC:23821 | UMODL1-AS1 | 21q22.3 | 150147 | ENSG00000184385 |
| HGNC:45096 | UNC5B-AS1 | 10q22.1 | 728978 | ENSG00000237512 |
| HGNC:40603 | UPK1A-AS1 | 19q13.12 | 100862728 | ENSG00000226510 |
| HGNC:41467 | UPP2-IT1 | 2q24.1 | 100874283 | ENSG00000237327 |
| HGNC:23128 | URB1-AS1 | 21q22.11 | 84996 | ENSG00000256073 |
| HGNC:48673 | USP2-AS1 | 11q23.3 | 100499227 | ENSG00000245248 |
| HGNC:44140 | USP3-AS1 | 15q22.31 | 100130855 | ENSG00000259248 |
| HGNC:39961 | USP12-AS1 | 13q12.13 | 100874070 | ENSG00000232162 |
| HGNC:39962 | USP12-AS2 | 13q12.13 | 100874071 | ENSG00000230641 |
| HGNC:27249 | USP27X-AS1 | Xp11.23 | 158572 | ENSG00000234390 |
| HGNC:40909 | USP30-AS1 | 12q24.11 | 100131733 | ENSG00000256262 |
| HGNC:43991 | USP46-AS1 | 4q12 | 643783 | ENSG00000248866 |
| HGNC:40802 | UST-AS1 | 6q25.1 | 100128176 | ENSG00000227660 |
| HGNC:53952 | UVRAG-DT | 11q13.5 | 100506113 | ENSG00000255507 |
| HGNC:49239 | UXT-AS1 | Xp11.23 | 100133957 | ENSG00000267064 |
| HGNC:48605 | VAC14-AS1 | 16q22.1 | 100130894 | ENSG00000214353 |
| HGNC:53215 | VASH1-AS1 | 14q24.3 | 100506603 | ENSG00000258301 |
| HGNC:40608 | VAV3-AS1 | 1p13.3 | 100873946 | ENSG00000230489 |
| HGNC:40163 | VCAN-AS1 | 5q14.3 | 105379054 | ENSG00000249835 |
| HGNC:44879 | VIM-AS1 | 10p13 | 100507347 | ENSG00000229124 |
| HGNC:40610 | VIPR1-AS1 | 3p22.1 | 100874007 | ENSG00000232354 |
| HGNC:49621 | VLDLR-AS1 | 9p24.2 | 401491 | ENSG00000236404 |
| HGNC:48915 | VPS9D1-AS1 | 16q24.3 | 100128881 | ENSG00000261373 |
| HGNC:44167 | VPS13A-AS1 | 9q21.2 | 100286938 | ENSG00000232998 |
| HGNC:51413 | VPS33B-DT | 15q26.1 | 101926911 | ENSG00000214432 |
| HGNC:50770 | VSTM2A-OT1 | 7p11.2 | 285878 | ENSG00000224223 |
| HGNC:44270 | VWA8-AS1 | 13q14.11 | 100507240 | ENSG00000278338 |
| HGNC:41508 | VWC2L-IT1 | 2q35 | 100885780 | ENSG00000224257 |
| HGNC:27347 | WAC-AS1 | 10p12.1 | 220906 | ENSG00000254635 |
| HGNC:40612 | WARS2-AS1 | 1p12 | 101929147 | ENSG00000231365 |
| HGNC:41393 | WARS2-IT1 | 1p12 | 104472716 | ENSG00000224238 |
| HGNC:39841 | WASF3-AS1 | 13q12.13 | 100874061 | ENSG00000237001 |
| HGNC:43440 | WASHC5-AS1 | 8q24.13 | 106479020 | ENSG00000253167 |
| HGNC:38513 | WASIR1 | Xq28 and Yq12 | 100128260 | ENSG00000185203 |
| HGNC:38609 | WASIR2 | 16p13.3 | 100132169 | ENSG00000231439 |
| HGNC:40935 | WDFY3-AS1 | 4q21.23 | 100874023 | ENSG00000251260 |
| HGNC:21603 | WDFY3-AS2 | 4q21.23 | 404201 | ENSG00000180769 |
| HGNC:45131 | WDR7-OT1 | 18q21.31 | 107985140 | ENSG00000267225 |
| HGNC:27437 | WDR11-AS1 | 10q26.12 | 283089 | ENSG00000227165 |
| HGNC:41186 | WDR86-AS1 | 7q36.1 | 100131176 | ENSG00000243836 |
| HGNC:48669 | WEE2-AS1 | 7q34 | 285962 | ENSG00000228775 |
| HGNC:40616 | WNT5A-AS1 | 3p14.3 | 100874008 | ENSG00000244586 |
| HGNC:51639 | WSPAR | 5q31.1 | 105664404 | ENSG00000249073 |
| HGNC:18135 | WT1-AS | 11p13 | 51352 | ENSG00000183242 |
| HGNC:41041 | WWC2-AS1 | 4q35.1 | 101928734 | ENSG00000251128 |
| HGNC:26390 | WWC2-AS2 | 4q35.1 | 152641 | ENSG00000251359 |
| HGNC:41236 | WWC3-AS1 | Xp22.2 | 100873953 | ENSG00000225076 |
| HGNC:53169 | WWOX-AS1 | 16q23.1 | 102724047 | ENSG00000260969 |
| HGNC:41035 | WWTR1-AS1 | 3q25.1 | 100128025 | ENSG00000241313 |
| HGNC:41469 | WWTR1-IT1 | 3q25.1 | 106478977 | ENSG00000241985 |
| HGNC:45056 | XACT | Xq23 | 105463123 | ENSG00000241743 |
| HGNC:40078 | XIAP-AS1 | Xq25 | 106480735 | ENSG00000237331 |
| HGNC:40679 | XIRP2-AS1 | 2q24.3 | 100874011 | ENSG00000254552 |
| HGNC:12810 | XIST | Xq13.2 | 7503 | ENSG00000229807 |
| HGNC:41153 | XXYLT1-AS1 | 3q29 | 100874528 | ENSG00000233303 |
| HGNC:41154 | XXYLT1-AS2 | 3q29 | 101410543 | ENSG00000230266 |
| HGNC:49034 | YAM1 | 16p11.2 | 107161157 |  |
| HGNC:41101 | YEATS2-AS1 | 3q27.1 | 100874113 | ENSG00000233885 |
| HGNC:48728 | YTHDF3-AS1 | 8q12.3 | 101410533 | ENSG00000270673 |
| HGNC:44188 | ZBED3-AS1 | 5q13.3 | 728723 | ENSG00000250802 |
| HGNC:48646 | ZBED5-AS1 | 11p15.4 | 729013 | ENSG00000247271 |
| HGNC:48573 | ZBTB11-AS1 | 3q12.3 | 100009676 | ENSG00000256628 |
| HGNC:40640 | ZBTB20-AS1 | 3q13.31 | 100131117 | ENSG00000241560 |
| HGNC:42421 | ZBTB20-AS2 | 3q13.31 | 100506673 | ENSG00000241295 |
| HGNC:42422 | ZBTB20-AS3 | 3q13.31 | 104413890 | ENSG00000239946 |
| HGNC:42423 | ZBTB20-AS4 | 3q13.31 | 100874131 | ENSG00000242767 |
| HGNC:52841 | ZBTB20-AS5 | 3q13.31 | 101929754 | ENSG00000242290 |
| HGNC:41493 | ZBTB40-IT1 | 1p36.12 | 100874345 | ENSG00000237200 |
| HGNC:40753 | ZBTB46-AS1 | 20q13.33 | 101928604 | ENSG00000231208 |
| HGNC:33799 | ZC3H18-AS1 | 16q24.2 | 400555 |  |
| HGNC:39900 | ZDHHC20-IT1 | 13q12.11 | 100874367 | ENSG00000236953 |
| HGNC:42354 | ZEB1-AS1 | 10p11.22 | 220930 | ENSG00000237036 |
| HGNC:37149 | ZEB2-AS1 | 2q22.3 | 100303491 | ENSG00000238057 |
| HGNC:53967 | ZEBTR | 10p11.22 | 113391337 |  |
| HGNC:33101 | ZFAS1 | 20q13.13 | 441951 | ENSG00000177410 |
| HGNC:33992 | ZFAT-AS1 | 8q24.22 | 594840 | ENSG00000248492 |
| HGNC:52658 | ZFHX2-AS1 | 14q11.2 | 109729160 | ENSG00000157306 |
| HGNC:44165 | ZFHX4-AS1 | 8q21.13 | 100192378 | ENSG00000253661 |
| HGNC:50698 | ZFPM2-AS1 | 8q23.1 | 102723356 | ENSG00000251003 |
| HGNC:40617 | ZFX-AS1 | Xp22.11 | 100873922 | ENSG00000234230 |
| HGNC:38798 | ZFY-AS1 | Yp11.2 | 107987337 | ENSG00000233070 |
| HGNC:40920 | ZIC4-AS1 | 3q24 | 100873950 | ENSG00000241202 |
| HGNC:51304 | ZIM2-AS1 | 19q13.43 | 101929059 | ENSG00000269793 |
| HGNC:53912 | ZKSCAN2-DT | 16p12.1 | 112577464 | ENSG00000274925 |
| HGNC:53964 | ZKSCAN7-AS1 | 3p21.31 | 112840933 | ENSG00000236869 |
| HGNC:27433 | ZMIZ1-AS1 | 10q22.3 | 283050 | ENSG00000224596 |
| HGNC:40624 | ZMYM4-AS1 | 1p34.3 | 100861513 | ENSG00000227409 |
| HGNC:40890 | ZMYND10-AS1 | 3p21.31 | 100874210 | ENSG00000235058 |
| HGNC:54109 | ZNF25-DT | 10p11.21 | 105376499 | ENSG00000226447 |
| HGNC:51179 | ZNF30-AS1 | 19q13.11 | 102723513 | ENSG00000270876 |
| HGNC:23577 | ZNF32-AS1 | 10q11.21 | 414197 | ENSG00000226245 |
| HGNC:23593 | ZNF32-AS2 | 10q11.21 | 414208 | ENSG00000230565 |
| HGNC:23583 | ZNF32-AS3 | 10q11.21 | 414201 | ENSG00000223910 |
| HGNC:53930 | ZNF114-AS1 | 19q13.33 | 105372429 | ENSG00000268186 |
| HGNC:40620 | ZNF197-AS1 | 3p21.31 | 100874094 | ENSG00000233509 |
| HGNC:28586 | ZNF205-AS1 | 16p13.3 | 81854 |  |
| HGNC:50505 | ZNF213-AS1 | 16p13.3 | 100507458 | ENSG00000263072 |
| HGNC:53779 | ZNF236-DT | 18q23 | 100131655 | ENSG00000264278 |
| HGNC:27821 | ZNF252P-AS1 | 8q24.3 | 286103 | ENSG00000255559 |
| HGNC:23130 | ZNF295-AS1 | 21q22.3 | 150142 | ENSG00000237232 |
| HGNC:40759 | ZNF337-AS1 | 20p11.21 | 102724826 | ENSG00000213742 |
| HGNC:50736 | ZNF341-AS1 | 20q11.22 | 101929746 | ENSG00000230753 |
| HGNC:41423 | ZNF346-IT1 | 5q35.2 | 106480741 | ENSG00000251666 |
| HGNC:48598 | ZNF350-AS1 | 19q13.41 | 101669766 | ENSG00000269235 |
| HGNC:41136 | ZNF385D-AS1 | 3p24.3 | 100874216 | ENSG00000225542 |
| HGNC:42420 | ZNF385D-AS2 | 3p24.3 | 100874221 | ENSG00000223351 |
| HGNC:53777 | ZNF426-DT | 19p13.2 | 101928238 | ENSG00000278611 |
| HGNC:53776 | ZNF433-AS1 | 19p13.2 | 101928464 | ENSG00000219665 |
| HGNC:25122 | ZNF436-AS1 | 1p36.12 | 148898 | ENSG00000249087 |
| HGNC:53824 | ZNF451-AS1 | 6p12.1 | 101927211 | ENSG00000226803 |
| HGNC:53774 | ZNF460-AS1 | 19q13.43 | 105372476 | ENSG00000267871 |
| HGNC:27370 | ZNF503-AS1 | 10q22.2 | 253264 | ENSG00000226051 |
| HGNC:23525 | ZNF503-AS2 | 10q22.2 | 100131213 | ENSG00000237149 |
| HGNC:51305 | ZNF528-AS1 | 19q13.41 | 102724105 | ENSG00000269834 |
| HGNC:51275 | ZNF529-AS1 | 19q13.12 | 101927599 | ENSG00000233527 |
| HGNC:27613 | ZNF561-AS1 | 19p13.2 | 284385 | ENSG00000267106 |
| HGNC:44324 | ZNF571-AS1 | 19q13.12 | 100507433 | ENSG00000267470 |
| HGNC:25213 | ZNF582-AS1 | 19q13.43 | 386758 | ENSG00000267454 |
| HGNC:41215 | ZNF630-AS1 | Xp11.23 | 100874120 | ENSG00000277541 |
| HGNC:51285 | ZNF649-AS1 | 19q13.41 | 101928571 | ENSG00000268095 |
| HGNC:44321 | ZNF667-AS1 | 19q13.43 | 100128252 | ENSG00000166770 |
| HGNC:44266 | ZNF674-AS1 | Xp11.3 | 401588 | ENSG00000230844 |
| HGNC:54048 | ZNF687-AS1 | 1q21.3 | 100507670 | ENSG00000232671 |
| HGNC:53141 | ZNF710-AS1 | 15q26.1 | 109729181 | ENSG00000259291 |
| HGNC:27617 | ZNF790-AS1 | 19q13.12 | 284408 |  |
| HGNC:51303 | ZNF793-AS1 | 19q13.12 | 101927720 | ENSG00000266916 |
| HGNC:41927 | ZNRF3-AS1 | 22q12.1 | 100874123 | ENSG00000177993 |
| HGNC:41440 | ZNRF3-IT1 | 22q12.1 | 100874339 | ENSG00000235786 |
| HGNC:43594 | ZRANB2-AS1 | 1p31.1 | 100132618 | ENSG00000235079 |
| HGNC:43595 | ZRANB2-AS2 | 1p31.1 | 100852410 | ENSG00000229956 |
| HGNC:48982 | ZSCAN16-AS1 | 6p22.1 | 100129195 | ENSG00000269293 |
| HGNC:45103 | ZSWIM8-AS1 | 10q22.2 | 100507331 | ENSG00000272589 |

**Table S2 Abnormal expression of 248 lncRNAs from the cBioPortal**

| id | TCGA-4J-AA1J-01 | TCGA-BI-A0VS-01 | TCGA-BI-A20A-01 | TCGA-C5-A0TN-01 | TCGA-C5-A1BE-01 | TCGA-C5-A1BF-01 | TCGA-C5-A1BI-01 | TCGA-C5-A1BJ-01 | TCGA-C5-A1BK-01 | TCGA-C5-A1BL-01 |
| --- | --- | --- | --- | --- | --- | --- | --- | --- | --- | --- |
| EXOC3-AS1 | 0.1843 | 2.3997 | -0.3 | 7.5422 | -0.4461 | -0.9985 | -0.5216 | 1.9745 | -0.3212 | 2.2834 |
| HCG18 | -1.0301 | 0.4842 | 0.5615 | 2.5993 | 0.1453 | 0.5987 | -0.695 | 0.0466 | 0.0082 | 0.2133 |
| NORAD | 1.7025 | 7.1538 | -1.3564 | 0.0329 | 3.4058 | 1.0101 | 0.2659 | 1.1263 | -0.3187 | 3.1371 |
| LINC00467 | 0.0023 | -1.2144 | -1.0542 | -1.0523 | -0.6458 | 0.4595 | 0.7319 | 0.2459 | 0.2988 | 0.2472 |
| SNHG11 | -0.5069 | 0.2081 | -0.9667 | -0.2502 | 1.3415 | 0.0361 | -0.776 | 0.0378 | 0.2048 | 0.2301 |
| FAM157A | -0.5323 | -0.4996 | -0.2045 | -0.7929 | -0.6864 | 0.9317 | 4.4123 | 0.218 | -0.5947 | 5.9261 |
| SNHG28 | -0.763 | 0.8833 | 0.6005 | -0.1255 | -0.7655 | 1.5053 | 0.7633 | 0.6492 | 0.4672 | -0.7808 |
| PVT1 | -0.5577 | 0.1126 | 0.0162 | 0.1353 | 0.145 | -0.2449 | -0.5016 | -0.2207 | 0.4881 | -0.0961 |
| GAS5 | -0.2492 | -0.6743 | -0.5906 | -0.6529 | -0.7154 | 0.909 | -0.2535 | 0.1163 | 0.598 | -0.4948 |
| LINC00638 | 0.2494 | 2.9377 | -0.3902 | 0.2461 | -0.6623 | 1.4474 | -0.5333 | 1.1635 | -0.8195 | 0.2877 |
| HCP5 | 1.4629 | -1.2916 | 0.8597 | 4.3528 | 0.6676 | -0.6722 | -0.4652 | 0.0316 | 0.1917 | -0.8025 |
| IGF2BP2-AS1 | 0.1469 | 0.5408 | -0.4959 | 0.9971 | 0.8397 | -0.4959 | -0.4959 | -0.1679 | -0.4959 | -0.4959 |
| SNHG20 | -0.9641 | -0.616 | 0.4626 | -1.0191 | -0.8562 | -0.1452 | -0.8628 | -0.7666 | 0.085 | -0.2744 |
| HCG11 | -1.0035 | 0.307 | 0.6137 | 3.191 | -0.4532 | 0.6343 | 0.5348 | 0.9921 | -0.5926 | 2.1488 |
| LINC00957 | -0.5798 | 0.3427 | 0.6519 | 0.4195 | 0.0858 | -0.3599 | -0.0813 | 0.3369 | 0.624 | 0.7216 |
| LINC00923 | 3.8491 | -0.2813 | 1.513 | 2.5256 | 0.0886 | -0.516 | -0.2909 | -0.516 | -0.516 | 3.4787 |
| LINC00964 | -0.0288 | 1.4318 | -0.4 | -0.3052 | -0.3277 | -0.4415 | 2.0858 | -0.4404 | -0.2115 | 0.1279 |
| ARRDC1-AS1 | -0.1298 | -0.9208 | -0.1669 | -0.5791 | -0.6161 | -0.6453 | -0.7272 | -0.5066 | -0.2666 | -0.6178 |
| LINC00112 | -0.2877 | -0.2877 | 4.7704 | -0.2877 | -0.2877 | -0.2877 | -0.2877 | -0.2877 | -0.2877 | -0.2877 |
| LINC01588 | 1.0614 | 2.7803 | -0.2542 | -1.0642 | -0.9255 | 0.0584 | 2.6653 | 0.4906 | 0.8657 | 0.1252 |
| FAM225B | -0.2055 | -0.1136 | -0.2515 | -0.6797 | -0.494 | 0.4071 | 0.0401 | 0.9092 | -0.5383 | 0.5586 |
| EGOT | 0.2014 | -0.5444 | 0.3816 | -0.5671 | -0.6255 | -0.4681 | 0.6687 | 1.0253 | -0.5036 | 0.9538 |
| FAM182A | -0.4544 | -0.5016 | -0.5016 | -0.5016 | -0.4852 | -0.462 | 1.9075 | 2.1718 | -0.0755 | 6.5249 |
| FAM182B | -0.4207 | -0.7432 | -0.5679 | -0.5618 | 0.6898 | -0.5206 | 0.1723 | 2.0185 | -0.3613 | 7.0716 |
| SNHG10 | -0.236 | 0.1477 | -0.1516 | -0.6912 | -0.7389 | -1.2178 | -1.0438 | -0.6967 | -0.2382 | 0.0503 |
| SPATA41 | 0.5227 | 0.03 | -0.4727 | 0.9418 | 0.377 | -0.0749 | 0.0466 | 0.6014 | 2.7288 | 1.1575 |
| TMEM105 | -0.1682 | -0.7226 | -0.5417 | 0.8361 | -0.3588 | -0.1353 | 0.0672 | -0.2908 | -0.0494 | -0.4761 |
| TP53TG1 | 0.3131 | -0.1736 | 0.6905 | -0.2985 | -0.6663 | 0.1985 | -0.1222 | 0.0523 | 0.0836 | -0.4929 |
| FAM66C | -0.6363 | -0.2025 | 0.8391 | 0.3577 | -0.0519 | 1.1227 | -0.584 | 0.4364 | -0.6847 | -0.7161 |
| FAM225A | -0.6538 | -0.3292 | -0.3072 | -0.7467 | -0.3918 | 0.0358 | 0.2541 | 0.3757 | -0.2154 | 0.0365 |
| MIR31HG | -0.3307 | 1.062 | -0.1497 | 4.4169 | -0.8899 | 1.5494 | 0.6065 | 0.1244 | 0.288 | 0.4424 |
| LINC00894 | 0.4149 | 0.0174 | 6.1409 | -0.88 | -0.7719 | -0.6147 | 0.5454 | -0.4923 | -0.0327 | -0.7057 |
| DUBR | 0.0948 | 0.1574 | -0.09 | 0.8983 | -0.7764 | 0.3031 | -0.6711 | -0.2276 | 0.0195 | -0.0893 |
| LINC01550 | -0.67 | -0.2561 | -0.6062 | -0.7073 | 0.5715 | 0.7474 | -0.2746 | 0.1207 | -0.1648 | 0.9469 |
| DSCR9 | -0.4693 | -0.0715 | -0.3138 | -0.666 | -0.489 | -0.7917 | -0.7167 | 0.4715 | 0.5744 | 0.8006 |
| JPX | -0.4873 | 0.4148 | 2.6073 | 0.8272 | 0.2112 | 0.5807 | -0.8461 | -0.8261 | -0.3344 | 2.3805 |
| LINC00592 | -0.5489 | -0.0237 | -0.0537 | -0.4012 | -0.5888 | -0.0724 | -0.3469 | -0.4477 | 0.0199 | 0.1619 |
| SNHG12 | -0.488 | -0.7654 | -0.03 | -0.9273 | -0.7147 | -0.8854 | -0.2792 | -0.3295 | 0.6849 | -0.9558 |
| SNHG15 | -0.4073 | -0.4622 | -0.4291 | 0.4143 | -0.3295 | -0.0472 | -0.2218 | 0.2598 | 0.5311 | 0.8797 |
| MIR205HG | 0.8263 | 0.6051 | 0.6378 | 0.2624 | -0.4405 | -0.1385 | 0.8979 | -0.161 | 0.6123 | 0.2425 |
| LINC00158 | -0.5533 | 0.0932 | 1.1546 | -0.0878 | -0.2757 | -0.3852 | -0.2433 | -0.2465 | 3.2663 | 0.2931 |
| LINC00240 | -0.5893 | -0.6854 | -0.2516 | 1.3606 | -0.2513 | -0.1967 | -0.6001 | -0.3533 | -0.0762 | -0.4847 |
| LINC00346 | 2.3652 | -1.0497 | -0.6915 | -0.2879 | -0.5944 | 0.0105 | -0.248 | 1.3971 | -0.3429 | 0.4506 |
| LINC01590 | 0.7135 | 0.0555 | -0.1011 | -0.217 | -0.7685 | 0.1149 | -0.7087 | -0.6459 | -0.4399 | -0.7999 |
| MIR155HG | -0.7267 | -0.0567 | 0.1741 | -0.3502 | -0.3488 | -0.25 | 0.0793 | -0.309 | 5.5851 | 0.383 |
| ZFAS1 | -0.6455 | 0.2372 | -0.9643 | -0.5573 | 0.0621 | 0.8731 | -0.763 | -0.2539 | 0.0442 | -0.5563 |
| CYTOR | -0.4774 | -0.4219 | -0.4396 | 1.51 | -0.5409 | 1.0341 | -0.5303 | -0.318 | 0.9326 | -0.4186 |
| FAM238A | -0.6757 | -0.6757 | 1.3274 | -0.6757 | -0.6757 | -0.6757 | 1.3241 | 0.314 | 0.6212 | -0.6757 |
| LINC00893 | 0.4029 | 0.2574 | 3.8528 | -0.7755 | -0.7041 | -0.8845 | 0.615 | -0.3163 | 0.5378 | -0.6578 |
| LINC00482 | -0.585 | -0.6282 | -0.3848 | -0.0039 | -0.5895 | 0.3466 | -0.3547 | -0.3728 | -0.5453 | -0.5193 |
| LINC00661 | 1.0654 | -0.3232 | 0.7524 | -0.3232 | -0.3232 | -0.3232 | -0.3232 | -0.3232 | -0.3232 | -0.3232 |
| LINC00689 | -0.4087 | -0.3347 | -0.2817 | -0.4852 | -0.3765 | 6.2422 | -0.1687 | -0.3215 | -0.2777 | -0.4852 |
| LINC00926 | -0.3622 | 0.2114 | 0.3862 | -0.744 | -0.801 | -0.3745 | -0.3575 | 0.4269 | 1.9472 | -0.7192 |
| SNHG17 | -0.233 | 2.3671 | -0.9805 | 1.6645 | 1.3779 | -0.5452 | -0.7991 | -0.2872 | 0.8977 | -0.0591 |
| CDKN2A-DT | -0.5626 | 0.2832 | -0.2343 | -1.0083 | 0.4498 | -0.6969 | 0.0213 | -0.5879 | 1.1099 | -0.0766 |
| LINC00426 | -0.5589 | 0.0547 | 0.3465 | -0.7215 | -0.5031 | -0.4035 | 0.3878 | 0.1273 | 1.1738 | 0.5401 |
| SNHG7 | -0.3811 | -0.9375 | -0.6965 | -0.5294 | -0.6222 | -0.4669 | -0.1877 | -0.7656 | -0.2704 | -0.1104 |
| SNHG9 | 0.0294 | 0.0008 | -0.7747 | -0.4389 | -0.498 | -0.3044 | -0.6173 | -0.6246 | -0.3171 | -0.5449 |
| LOH12CR2 | -0.3022 | 0.3042 | 0.0689 | 0.1931 | 0.0216 | -0.4394 | -0.2668 | -0.1139 | -0.7849 | -0.6939 |
| ZNF436-AS1 | 0.2813 | 1.1115 | 0.8147 | -1.1658 | -0.2474 | -0.2911 | -0.4004 | -0.7337 | -0.53 | -0.9825 |
| LINC00663 | -0.8412 | -1.1967 | -1.0813 | -1.328 | -0.7146 | -0.4938 | -0.6417 | 0.3532 | 0.0683 | -0.2881 |
| LINC01600 | -0.269 | -0.9431 | 1.1459 | -0.9431 | -0.2427 | 0.4704 | 0.0996 | -0.083 | -0.605 | -0.2313 |
| C21ORF62-AS1 | -0.8369 | -1.1982 | -0.8512 | -1.2894 | -0.5058 | 0.134 | -0.5019 | -0.712 | -0.3815 | -0.4532 |
| DGCR5 | -0.5663 | -0.5057 | -0.0111 | 1.492 | 0.1572 | -0.2568 | -0.5234 | -0.303 | -0.2458 | -0.4908 |
| LINC00161 | -0.4634 | -0.4634 | -0.4634 | -0.4634 | 2.1328 | 0.3227 | -0.4634 | -0.4634 | -0.4634 | -0.4634 |
| LINC00336 | 0.1483 | -0.5865 | -0.5865 | 0.0962 | -0.5865 | -0.5865 | -0.5865 | -0.3615 | -0.5865 | -0.2762 |
| LINC01547 | -0.3397 | -1.1905 | 0.3833 | -1.0124 | -0.0058 | -0.1241 | 0.0806 | 0.8872 | 0.8438 | 0.5343 |
| MIR9-3HG | 1.2109 | -1.0265 | 1.3253 | 0.2683 | -0.0106 | -1.2896 | 0.6699 | 1.1441 | 0.6616 | -0.1272 |
| H19 | 0.0346 | -0.3728 | -0.3546 | 2.4231 | -0.3918 | -0.2381 | -0.3854 | 0.1186 | -0.3945 | -0.351 |
| LINC00265 | 0.9167 | -1.2001 | 0.5137 | -0.0555 | -0.4708 | -0.2559 | 0.2251 | -0.5393 | 1.4848 | 1.262 |
| LINC01555 | 0.449 | -0.3952 | -0.0682 | 0.5852 | -0.3952 | -0.3952 | -0.3952 | -0.1797 | -0.3952 | -0.3952 |
| SNHG6 | -0.6892 | 0.1202 | -0.085 | -0.1679 | -0.1839 | 0.6923 | -0.2746 | -0.3882 | -0.0052 | -0.4868 |
| DIO3OS | 0.2087 | -0.3969 | -0.0767 | 1.0665 | -0.5671 | 0.4393 | 0.3076 | 0.0072 | -0.4965 | -0.5671 |
| FAM66D | -0.6788 | -0.6688 | -0.6698 | -0.5867 | -0.6951 | -0.422 | 0.0953 | -0.5219 | 0.3021 | -0.5298 |
| LINC00319 | -0.5972 | -0.0415 | -0.5965 | -0.3193 | -0.4304 | 2.3957 | -0.298 | 0.6727 | -0.4947 | 0.4278 |
| ATP2B1-AS1 | -0.2559 | 0.5032 | -0.173 | 0.4589 | 1.7515 | -0.1034 | -0.6634 | -0.0689 | 0.1187 | 0.3281 |
| DSCR10 | -0.1634 | 2.6788 | -0.1634 | -0.1634 | -0.1634 | -0.1634 | -0.1634 | -0.1634 | -0.1634 | -0.1634 |
| LINC00305 | -0.1975 | -0.1975 | -0.1975 | -0.1975 | -0.1975 | -0.1975 | -0.1975 | -0.1975 | -0.1975 | -0.1975 |
| LINC00652 | -0.2766 | 0.4075 | -0.4755 | -0.4755 | -0.4755 | 0.0449 | -0.3343 | -0.1802 | 0.8059 | -0.2828 |
| NEAT1 | 0.3564 | -0.6328 | 0.1241 | -0.5739 | -0.7413 | -0.5118 | -0.3412 | -0.3974 | 0.0215 | -1.0439 |
| OLMALINC | -0.1598 | -1.2427 | -0.3385 | -1.2409 | -0.2568 | -0.3711 | 0.0228 | -0.1399 | 0.1552 | 0.0424 |
| SNHG5 | -0.5758 | -0.7553 | -0.6743 | -0.8613 | -0.1551 | 1.3603 | -0.7973 | -0.7908 | 0.0421 | -0.9541 |
| URB1-AS1 | -0.3276 | -0.9312 | -0.4174 | -0.6532 | 0.6955 | 0.2387 | -1.0113 | 0.174 | 0.0447 | -0.2312 |
| FAM215A | 0.0506 | -0.5052 | -0.5052 | 0.4631 | -0.5052 | -0.5052 | -0.2903 | -0.5052 | -0.5052 | -0.5052 |
| LINC00092 | -0.6938 | -0.2767 | 0.308 | -0.6938 | 0.1301 | 0.0437 | -0.5738 | -0.509 | 0.2401 | -0.3115 |
| NBR2 | 1.7687 | -0.8379 | -0.3636 | -1.182 | -0.5741 | -0.0532 | -0.6591 | -0.7408 | -0.3882 | -1.1315 |
| SNHG1 | -0.2886 | -0.6436 | -0.1297 | -0.4249 | -0.1072 | -0.6645 | 0.1796 | -0.2357 | 0.4741 | -0.2739 |
| LINC00574 | 1.1612 | -0.709 | -0.4893 | 3.2141 | -0.5359 | 3.9369 | -0.593 | 0.7739 | 0.6118 | -0.709 |
| HCG27 | -0.1628 | -0.7037 | 2.1241 | -0.0948 | -0.5517 | -0.5571 | -0.6222 | -0.2474 | 0.7418 | 0.5968 |
| LINC00111 | -0.4136 | -0.4136 | 1.3617 | -0.4136 | -0.4136 | -0.4136 | 1.359 | 0.756 | -0.4136 | -0.4136 |
| BCAR4 | -0.075 | 0.0566 | -0.1184 | -0.1184 | 0.0018 | -0.1184 | -0.0848 | -0.0741 | -0.1184 | -0.0726 |
| LINC00662 | 0.2174 | -0.7372 | -0.5887 | -0.8714 | -0.838 | 0.693 | -0.7107 | -0.7276 | -0.8223 | -0.8174 |
| LINC00852 | -1.0692 | -0.0695 | -0.2337 | -1.8276 | -0.2875 | -1.3312 | -0.4435 | 0.1526 | 0.5956 | -0.3889 |
| LINC00982 | -0.4268 | -0.4327 | -0.4101 | -0.4572 | -0.373 | -0.1767 | -0.4102 | -0.3175 | -0.3657 | -0.2967 |
| LINC01465 | -0.7878 | 0.5514 | -0.2435 | 0.5347 | -0.2211 | -0.4261 | -0.6014 | 0.8708 | -0.3241 | -0.4424 |
| MALAT1 | -0.6314 | 0.1132 | -0.1367 | -0.7019 | -0.2522 | 0.2865 | -0.3982 | -0.163 | 0.3647 | -0.5274 |
| MIR99AHG | -0.1826 | -0.6266 | 1.9054 | -0.6726 | 0.3377 | -0.2711 | -0.2231 | 0.5604 | -0.6269 | 1.4694 |
| ATP1A1-AS1 | 0.181 | -0.6263 | -0.2737 | 0.65 | -1.0654 | -0.6909 | -0.923 | -0.8402 | -0.6343 | -1.1371 |
| FAM201A | -0.016 | 0.3643 | 0.7239 | 1.4785 | 0.8198 | -0.3511 | -0.4563 | -0.5327 | -0.8531 | -1.194 |
| HCCAT5 | -0.2629 | -0.2629 | -0.2629 | -0.2629 | -0.2629 | -0.2629 | -0.2629 | 1.8842 | -0.2629 | -0.2629 |

This table shows 100 lncRNA expression values in 10 cases selected from 248 lncRNA expression values in 212 TCGA samples.

**Table S3 The relative expression of 7 DELs in tumor and adjacent tissues in CC**

| Gene Name | log2FC | *P-*adjusted |
| --- | --- | --- |
| HULC | 2.559 | 0.110 |
| LINC00189 | -0.604 | 0.606 |
| LINC00173 | -1.157 | 0.318 |
| HCG11 | -1.188 | **0.028** |
| MIR22HG | -1.503 | **0.029** |
| CASC15 | -1.577 | 0.115 |
| LINC00905 | ... | ... |
| FC, fold change; …, missing value | |  |

Bold numbers indicate statistically significant differences with a pvalue < 0.05.

**Table S4 Expression levels of HCG11 and MIR22HG in 20 cancers from circlncRNAnet data**

| Cancer Type | HCG11 | | MIR22HG | |
| --- | --- | --- | --- | --- |
| Log2FC | *P*-adjusted | Log2FC | *P*-adjusted |
| BLCA | -0.96 | **0.007** | -2.12 | **0.000** |
| BRCA | -1.28 | **0.000** | -1.61 | **0.000** |
| CESC | -1.19 | **0.028** | -1.50 | **0.029** |
| CHOL | 0.37 | 0.595 | -1.26 | **0.000** |
| COAD | 0.07 | 0.736 | -1.77 | **0.000** |
| ESCA | -0.01 | 0.980 | -0.96 | **0.005** |
| HNSC | -0.41 | **0.023** | -0.76 | **0.000** |
| KICH | -0.36 | 0.142 | -0.03 | 0.987 |
| KIRC | -0.04 | 0.751 | -0.65 | **0.000** |
| KIRP | 0.19 | 0.377 | -1.32 | **0.000** |
| LIHC | -0.69 | **0.000** | -0.66 | **0.000** |
| LUAD | -0.39 | **0.001** | -1.63 | **0.000** |
| LUSC | -0.55 | **0.000** | -1.98 | **0.000** |
| PAAD | -0.12 | 0.923 | -0.28 | 0.737 |
| PCPG | 1.60 | **0.031** | -1.55 | **0.025** |
| PRAD | -1.16 | **0.000** | -0.92 | **0.000** |
| READ | 0.02 | 0.991 | -1.79 | **0.000** |
| STAD | -0.25 | 0.252 | -1.42 | **0.000** |
| THCA | -0.64 | **0.000** | -1.28 | **0.000** |
| UCEC | -1.87 | **0.000** | -1.44 | **0.000** |
| FC, fold change. | |  |  |  |
| Bold numbers indicate statistically significant differences with a pvalue < 0.05. | | | | |

| **Table S5 Subgroup survival analyses for correlation of clinicopathological characteristics and HCG11 expression in CC patients** |
| --- |
|

| **Variable** | **HCG11 expression (Patients/Recurrence)** | | **HR (95% CI)** | ***P* value** |
| --- | --- | --- | --- | --- |
| **Low** | **High** |
| Age at diagnosis | | | | |
| <45 | 51/4 | 48/7 | 1.88 (0.55-6.42) | 0.314 |
| ≥ 45 | 47/4 | 53/10 | 2.23 (0.70-7.13) | 0.177 |
| Number of pregnancies | | | | |
| ≤ 3 | 49/4 | 56/10 | 2.00 (0.63-6.37) | 0.243 |
| ＞3 | 37/3 | 36/6 | 2.64 (0.65-10.68) | 0.173 |
| Smoking status | | | | |
| No | 52/5 | 46/8 | 1.84 (0.60-5.64) | 0.284 |
| Yes | 38/1 | 47/8 | 6.11 (0.76-49.44) | 0.090 |
| Neoplasm histologic grade | | | | |
| G1/G2 | 53/5 | 50/8 | 1.73 (0.56-5.33) | 0.399 |
| G3/G4 | 40/3 | 37/9 | 3.01 (0.81-11.11) | 0.099 |
| Stage | | | | |
| I/II | 74/8 | 83/14 | 1.70 (0.71-4.05) | 0.232 |
| III/IV | 21/0 | 16/3 | 77.51 (0.00-7151709.93) | 0.456 |
| T stage | | | | |
| T1/T2 | 78/7 | 62/11 | 1.99 (0.77-5.13) | 0.155 |
| T3/T4 | 4/0 | 7/2 | 46.13 (0.00-5843399.72) | 0.523 |
| Lymph node metastasis | | | | |
| N0 | 47/1 | 43/6 | 6.57 (0.79-54.56) | 0.082 |
| N1 | 26/5 | 15/5 | 2.33 (0.66-8.26) | 0.189 |
| Metastasis | | | | |
| M0 | 38/2 | 41/8 | 4.08 (0.86-19.22) | 0.076 |
| M1 | 2/0 | 6/0 |  |  |
| Chemotherapy | |  |  |  |
| NO | 48/3 | 54/9 | 2.48 (0.67-9.20) | 0.174 |
| YES | 50/5 | 47/8 | 1.87 (0.61-5.72) | 0.272 |
| Radiation therapy | | | | |
| NO | 27/2 | 28/5 | 2.58 (0.50-13.28) | 0.258 |
| YES | 62/6 | 68/12 | 1.84 (0.69-4.93) | 0.233 |
| Molecular therapy | | | | |
| NO | 25/3 | 24/6 | 1.80 (0.44-7.40) | 0.414 |
| YES | 50/5 | 48/8 | 1.84 (0.60-5.63) | 0.285 |
| HR, Hazard Ratio; CI, confidence interval. | | |  |  |

**Table S6 GO terms and KEEG pathways enriched by the co-expressed genes of MIR22HG**

| **Category** | **Term** | **Count (genes)** | ***P* value** |
| --- | --- | --- | --- |
| GO term: BP | cell cycle G1/S phase transition | 36 | 2.24E-31 |
|  | G1/S transition of mitotic cell cycle | 35 | 1.83E-30 |
|  | mitotic cell cycle phase transition | 41 | 9.63E-28 |
|  | DNA replication initiation | 21 | 5.13E-24 |
|  | mitotic cell cycle process | 48 | 6.76E-22 |
| GO term: CC | nuclear part | 131 | 2.30E-22 |
|  | protein-containing complex | 137 | 4.20E-22 |
|  | nuclear lumen | 122 | 7.90E-21 |
|  | transferase complex, transferring phosphorus-containing groups | 33 | 7.90E-21 |
|  | nucleoplasm | 111 | 1.50E-20 |
| GO term: MF | DNA-directed 5'-3' RNA polymerase activity | 15 | 1.67E-13 |
|  | nucleotidyltransferase activity | 20 | 4.40E-13 |
|  | transferase activity, transferring phosphorus-containing groups | 43 | 3.35E-10 |
|  | DNA replication origin binding | 9 | 4.75E-10 |
|  | cyclin-dependent protein serine/threonine kinase activity | 11 | 4.75E-10 |
| KEGG pathways | Cell cycle | 33 | 6.99E-29 |
|  | Spliceosome | 21 | 2.78E-14 |
|  | Pyrimidine metabolism | 19 | 3.61E-14 |
|  | RNA polymerase | 13 | 2.29E-13 |
|  | Epstein-Barr virus infection | 21 | 1.43E-11 |
|  | DNA replication | 12 | 1.62E-11 |
|  | Purine metabolism | 19 | 1.10E-10 |
|  | Viral carcinogenesis | 19 | 2.38E-10 |
|  | p53 signaling pathway | 11 | 8.19E-08 |
|  | Cellular senescence | 14 | 5.82E-07 |
|  | HTLV-I infection | 17 | 8.17E-07 |
|  | Small cell lung cancer | 11 | 1.04E-06 |
|  | Hepatitis B | 12 | 7.93E-06 |
|  | Cushing's syndrome | 12 | 1.54E-05 |
|  | RNA degradation | 9 | 1.56E-05 |
| GO, gene ontology; KEGG, Kyoto Encyclopedia of Genes and Genomes; BP, biological process;  CC, cellular component; MF, molecular function. | | | |
|

| **Table S7 Primer sequence used in this study** | |
| --- | --- |
| Gene | Sequence (5'--3') |
| MIR22HG-F | ATCCAAAGCAGGACAGCA |
| MIR22HG-R | TGGCAGGTTTACACTCACT |
| GAPDH-F | GTCAAGGCTGAGAACGGGAA |
| GAPDH-R | AAATGAGCCCCAGCCTTCTC |
